# Supplementary material for: Multicomponent non-pharmacological intervention to prevent delirium for hospitalised people with advanced cancer: study protocol for a phase II cluster randomised controlled trial
Source: PubMed Central journal article supplement — BMJ Open. 2019 Jan 28;9(1):e026177. doi: 10.1136/bmjopen-2018-026177 (PMC6352777; doi:10.1136/bmjopen-2018-026177), 2019-01-28
Supplement: bmjopen-2018-026177.draft_revisions.pdf [file bmjopen-2018-026177.draft_revisions.pdf]

# BMJ Open

BMJ Open is committed to open peer review. As part of this commitment we make the peer review history of every article we publish publicly available.

When an article is published we post the peer reviewers' comments and the authors' responses online. We also post the versions of the paper that were used during peer review. These are the versions that the peer review comments apply to.

The versions of the paper that follow are the versions that were submitted during the peer review process. They are not the versions of record or the final published versions. They should not be cited or distributed as the published version of this manuscript.

BMJ Open is an open access journal and the full, final, typeset and author-corrected version of record of the manuscript is available on our site with no access controls, subscription charges or pay-per-view fees (<http://bmjopen.bmj.com>).

If you have any questions on BMJ Open's open peer review process please email [info.bmjopen@bmj.com](mailto:info.bmjopen@bmj.com)

# BMJ Open

## Multicomponent non-pharmacological intervention to prevent delirium for hospitalised people with advanced cancer: study protocol for a phase II cluster randomised controlled trial

|                               |                                                                                                                                                                                                                                                                                                                                                                                                                                                                                                                                                                                                                                                                                                                                                                                                                                                                                                                                                                                                                                                                                                                                                                                                                                                                                                                                                                                                                                                                                                                                                                                                                                                                                                                                                                                                                                                                                                                                                                                                                                                                                                                                                                                                                           |
|-------------------------------|---------------------------------------------------------------------------------------------------------------------------------------------------------------------------------------------------------------------------------------------------------------------------------------------------------------------------------------------------------------------------------------------------------------------------------------------------------------------------------------------------------------------------------------------------------------------------------------------------------------------------------------------------------------------------------------------------------------------------------------------------------------------------------------------------------------------------------------------------------------------------------------------------------------------------------------------------------------------------------------------------------------------------------------------------------------------------------------------------------------------------------------------------------------------------------------------------------------------------------------------------------------------------------------------------------------------------------------------------------------------------------------------------------------------------------------------------------------------------------------------------------------------------------------------------------------------------------------------------------------------------------------------------------------------------------------------------------------------------------------------------------------------------------------------------------------------------------------------------------------------------------------------------------------------------------------------------------------------------------------------------------------------------------------------------------------------------------------------------------------------------------------------------------------------------------------------------------------------------|
| Journal:                      | <i>BMJ Open</i>                                                                                                                                                                                                                                                                                                                                                                                                                                                                                                                                                                                                                                                                                                                                                                                                                                                                                                                                                                                                                                                                                                                                                                                                                                                                                                                                                                                                                                                                                                                                                                                                                                                                                                                                                                                                                                                                                                                                                                                                                                                                                                                                                                                                           |
| Manuscript ID                 | bmjopen-2018-026177                                                                                                                                                                                                                                                                                                                                                                                                                                                                                                                                                                                                                                                                                                                                                                                                                                                                                                                                                                                                                                                                                                                                                                                                                                                                                                                                                                                                                                                                                                                                                                                                                                                                                                                                                                                                                                                                                                                                                                                                                                                                                                                                                                                                       |
| Article Type:                 | Protocol                                                                                                                                                                                                                                                                                                                                                                                                                                                                                                                                                                                                                                                                                                                                                                                                                                                                                                                                                                                                                                                                                                                                                                                                                                                                                                                                                                                                                                                                                                                                                                                                                                                                                                                                                                                                                                                                                                                                                                                                                                                                                                                                                                                                                  |
| Date Submitted by the Author: | 21-Aug-2018                                                                                                                                                                                                                                                                                                                                                                                                                                                                                                                                                                                                                                                                                                                                                                                                                                                                                                                                                                                                                                                                                                                                                                                                                                                                                                                                                                                                                                                                                                                                                                                                                                                                                                                                                                                                                                                                                                                                                                                                                                                                                                                                                                                                               |
| Complete List of Authors:     | <p>Hosie, Annmarie; University of Technology Sydney, IMPACCT - Improving Palliative, Aged and Chronic Care through Clinical Research and Translation</p> <p>Phillips, Jane; University of Technology Sydney, IMPACCT - Improving Palliative, Aged and Chronic Care through Clinical Research and Translation</p> <p>Lam, Lawrence; University of Technology Sydney, IMPACCT - Improving Palliative, Aged and Chronic Care through Clinical Research and Translation</p> <p>Kochovska, Slavica; University of Technology Sydney Faculty of Health, IMPACCT - Improving Palliative, Aged and Chronic Care through Clinical Research and Translation</p> <p>Noble, Beverly; University of Technology Sydney, IMPACCT - Improving Palliative, Aged and Chronic Care through Clinical Research and Translation</p> <p>Brassil, Meg; University of Technology Sydney, IMPACCT - Improving Palliative, Aged and Chronic Care through Clinical Research and Translation</p> <p>Kurrle, Susan; Hornsby Ku-ring-gai Health Service, University of Sydney, Northern Clinical School</p> <p>Cumming, Anne; Australian Commission on Safety and Quality in Healthcare</p> <p>Caplan, Gideon; Prince of Wales Hospital, Geriatric Medicine; University of New South Wales</p> <p>Chye, Richard; St. Vincent's Hospital, Sacred Heart Health Service</p> <p>Le, Brian; Royal Melbourne Hospital, Palliative and Supportive Services</p> <p>Ely, E. Wesley; Vanderbilt University Medical Center, Center for Critical Illness, Brain dysfunction &amp; Survivorship (CIBS)</p> <p>Lawlor, Peter; University of Ottawa, Department of Medicine</p> <p>Bush, Shirley H.; University of Ottawa, Department of Medicine</p> <p>Davis, Jan Maree; Calvary Health Care Kogarah, Palliative Care</p> <p>Lovell, Melanie; Hornsby Ku-ring-gai Health Service, University of Sydney, Northern Clinical School; Greenwich Hospital, HammondCare</p> <p>Brown, Linda; University of Technology Sydney, IMPACCT - Improving Palliative, Aged and Chronic Care through Clinical Research and Translation</p> <p>Fazekas, Belinda; University of Technology Sydney, IMPACCT - Improving Palliative, Aged and Chronic Care through Clinical Research</p> |

1  
2  
3  
4  
5  
6  
7  
8  
9  
10  
11  
12  
13  
14  
15  
16  
17  
18  
19  
20  
21  
22  
23  
24  
25  
26  
27  
28  
29  
30  
31  
32  
33  
34  
35  
36  
37  
38  
39  
40  
41  
42  
43  
44  
45  
46  
47  
48  
49  
50  
51  
52  
53  
54  
55  
56  
57  
58  
59  
60

|           |                                                                                                                                                                                                                                                                                                                                                                                                                                                        |
|-----------|--------------------------------------------------------------------------------------------------------------------------------------------------------------------------------------------------------------------------------------------------------------------------------------------------------------------------------------------------------------------------------------------------------------------------------------------------------|
|           | and Translation<br>Cheah, Seong; University of Technology Sydney Faculty of Health,<br>Centre for Midwifery, Child and Family Health<br>Edwards, Layla; University of Technology Sydney, IMPACCT - Improving<br>Palliative, Aged and Chronic Care through Clinical Research and<br>Translation<br>Agar, Meera ; University of Technology Sydney, IMPACCT - Improving<br>Palliative, Aged and Chronic Care through Clinical Research and<br>Translation |
| Keywords: | delirium, neoplasms, prevention, non-pharmacological, clinical trial,<br>PALLIATIVE CARE                                                                                                                                                                                                                                                                                                                                                               |
|           |                                                                                                                                                                                                                                                                                                                                                                                                                                                        |

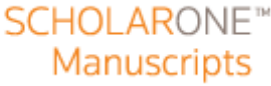

## The PRESERVE pilot study

## Title: Multicomponent non-pharmacological intervention to prevent delirium for hospitalised people with advanced cancer: study protocol for a phase II cluster randomised controlled trial

---

**Author**Annamarie Hosie<sup>1</sup>Jane Phillips<sup>1</sup>,Lawrence Lam<sup>1</sup>Slavica Kochovska<sup>1</sup>,Beverly Noble<sup>1</sup>Meg Brassil<sup>1</sup>Susan Kurrle<sup>2</sup>Anne Cumming<sup>3</sup>Gideon A Caplan<sup>4,5</sup>Richard Chye<sup>6</sup>Brian Le<sup>7</sup>E. Wesley Ely<sup>8</sup>Peter G. Lawlor<sup>9</sup>Shirley H. Bush<sup>9</sup>Jan Maree Davis<sup>10</sup>Melanie Lovell<sup>1,2,11</sup>Linda Brown<sup>1</sup>Belinda Fazekas<sup>1</sup>Seong Leang Cheah<sup>1</sup>Layla Edwards<sup>1</sup>Meera Agar<sup>1</sup>**Email**

annmarie.hosie@uts.edu.au

jane.phillips@uts.edu.au

lawrence.lam@uts.edu.au

slavica.kochovska@uts.edu.au

bev.noble@bigpond.com

meg.brassil@bigpond.com.au

susan.kurrle@sydney.edu.au

anne.cumming@safetyandquality.gov.au

gideon.caplan@health.nsw.gov.au

richard.chye@svha.org.au

brian.le@mh.org.au

wes.ely@vumc.org

plawlor@bruyere.org

sbush@bruyere.org

janmaree.davis@health.nsw.gov.au

mlovell@hammond.com.au

linda.brown@uts.edu.au

belinda.fazekas@uts.edu.au

seong.cheah@uts.edu.au

layla.edwards@uts.edu.au

meera.agar@uts.edu.au

**Institutions**

1. University of Technology Sydney, IMPACCT, Bld. 10, Level 3, 235-253 Jones St, Ultimo, Australia
2. University of Sydney, Northern Clinical School, Hornsby Ku-ring-gai Health Service, Hornsby, NSW 2077, Australia
3. Australian Commission on Safety and Quality in Health Care, Level 5, 255 Elizabeth St, Sydney, Australia
4. Prince of Wales Hospital, Geriatric Medicine, High Street, Randwick, NSW, 2035, Australia
5. University of New South Wales, Randwick, NSW, 2035, Australia
6. St Vincent's Hospital, Sacred Heart Health Service, Darlinghurst Road, Darlinghurst, NSW 2010, Australia
7. Royal Melbourne Hospital, Palliative and Supportive Services, 1 South West Grattan Street, Parkville, VIC 3050, Australia
8. Center for Critical Illness, Brain dysfunction & Survivorship (CIBS), 2525 West End Ave, Suite 450, Nashville, TN 37203-8300, USA
9. University of Ottawa, Department of Medicine, 43 Bruyère Street, Ottawa K1N 5C8, Canada
10. Calvary Health Care Kogarah Palliative Care, Rocky Point Road Kogarah NSW 2217, Australia
11. Greenwich Hospital, HammondCare, 97-115 River Rd, Greenwich, NSW 2065, Australia

**Corresponding Author**

Dr Annmarie Hosie

Phone: +61 2 9514 4404

Email: [annmarie.hosie@uts.edu.au](mailto:annmarie.hosie@uts.edu.au)**Document details**

Number of tables: 1

Number of figures: 2

Number of references: 45

Word count: 3988

The PRESERVE pilot study

## Abstract

### Introduction

Delirium is a significant medical complication for hospitalised patients. Up to one-third of delirium episodes are preventable in older inpatients through non-pharmacological strategies that support essential human needs, such as physical and cognitive activity, sleep, hydration, vision and hearing. We hypothesized that a multicomponent intervention similarly may decrease delirium incidence, and/or its duration and severity, in inpatients with advanced cancer. Prior to a phase III trial, we aimed to determine if a multicomponent non-pharmacological delirium prevention intervention is feasible and acceptable for this specific inpatient group.

### Methods and analysis

The study is a phase II cluster randomised wait-listed controlled trial involving inpatients with advanced cancer at four Australian palliative care inpatient units. Intervention sites will introduce delirium screening, diagnostic assessment and a multicomponent delirium prevention intervention with six domains of care: preserving natural sleep; maintaining optimal vision and hearing; optimising hydration; promoting communication, orientation and cognition; optimising mobility; and promoting family partnership. Interdisciplinary teams will tailor intervention delivery to each site, and to patient need. Control sites will first introduce only delirium screening and diagnosis, later implementing the intervention, modified according to initial results. The primary outcome is adherence to the intervention during the first seven days of admission, as measured for 60 consecutively admitted eligible patients. Secondary outcomes relate to fidelity and feasibility, acceptability and sustainability of the study intervention, processes and measures in this patient population, using quantitative and qualitative measures. Delirium incidence and severity will be measured to inform power calculations for a future phase III trial.

The PRESERVE pilot study

### **Ethics and dissemination**

Ethical approval was obtained for all four sites. Trial results, qualitative sub-study findings, and implementation of the intervention will be submitted for publication in peer-reviewed journals, and reported at conferences, to study sites and key peak bodies.

### **Trial registration**

ACTRN12617001070325p

### **Key words**

Delirium, cancer, neoplasms, inpatients, palliative care, clinical trial, feasibility studies

### **Strengths and limitations of this study**

- Strengths are the cluster RCT design; inclusion of patient and family perspectives; and sponsorship by the Palliative Care Clinical Trials Collaborative (PaCCSC), a national, multi-site clinical trials group which provides rigorous research governance.
- A limitation is that site and research staff will not be blinded to the intervention.
- The study is being conducted in Australian palliative care inpatient settings and will include only patients with advanced cancer, which will limit the generalisability of results for other settings and people with other advanced illnesses.

The PRESERVE pilot study

## Introduction

Delirium is a serious acute neurocognitive disorder and medical complication for people with advanced cancer receiving palliative care in hospital, where it occurs for up to one in two patients and is reversible in only up to half of cases, at best.<sup>1-3</sup> It causes sudden disruption to attention and cognition, such as memory and language deficit, disorientation, and perception.<sup>1</sup> During delirium, feelings of fear, humiliation, confusion and isolation are common,<sup>4</sup> at a time when connection with family, friends and health professionals is important and highly valued.<sup>5</sup> Family experience high levels of distress as a result.<sup>5</sup> Delirium is further associated with increased falls, pressure areas, longer-term cognitive and functional decline, duration of hospital stay, mortality, and health care costs.<sup>6-8</sup>

Despite the incidence of delirium and its profound impacts on people with advanced illness, there are limited treatment options and, to date, no effective pharmacological intervention.<sup>9-11</sup> Nor have evidence-based processes for delirium prevention, recognition or assessment been translated in palliative care units.<sup>12,13</sup> The most effective strategy for delirium in older patients across a range of hospital settings is prevention through non-pharmacological strategies to meet essential needs, such as physical and cognitive activity, sleep, hydration, vision and hearing. When implemented as a 'multicomponent intervention', these strategies have reduced delirium incidence by one-third.<sup>9,14</sup> A meta-analysis (n=4,267) of randomised or matched trials of non-pharmacological prevention strategies reported significant reduction in delirium incidence, with the odds of delirium 53% lower in the intervention group compared with controls (odds ratio (OR) 0.47, 95% confidence interval (CI) 0.38-0.58, p<0.001).<sup>14</sup> A Cochrane Review of 39 randomised controlled trials (n=16,082) of non-pharmacological, medication or anaesthetic interventions reported that seven non-pharmacological intervention studies (n=1,950) reduced delirium incidence (relative risk (RR) 0.69, 95% CI 0.59 to 0.81), while evidence for most medication and anaesthetic

## The PRESERVE pilot study

1  
2  
3 interventions was uncertain.<sup>9</sup> There was moderate quality evidence that the non-  
4  
5 pharmacological interventions reduced length of hospital admission and improved the  
6  
7 likelihood of return to independent living, with low quality evidence of decreased delirium  
8  
9 duration and severity.<sup>9</sup> Studies of non-pharmacological interventions for delirium have  
10  
11 mainly focused on older patients, yet often excluded patients with advanced cancer and other  
12  
13 life-threatening illnesses.<sup>15</sup> Also, strategies within the interventions were diverse, some were  
14  
15 better operationalised than others, and not all used a randomised design.<sup>14</sup>  
16  
17

18  
19 The one study testing a non-pharmacological delirium prevention intervention in people with  
20  
21 advanced cancer (n=1,516) in seven Canadian specialist palliative care inpatient units  
22  
23 reported no statistically significant difference in delirium incidence, total days in delirium,  
24  
25 duration of first episode, severity or delirium-free survival.<sup>16</sup> Strategies were fewer and less  
26  
27 targeted to essential needs of patients than those reported in the more recent meta-analysis  
28  
29 and Cochrane review;<sup>9,14</sup> and included: i) orientating patients to time, person and place each  
30  
31 shift; ii) informing family about delirium, its symptoms and prevention of confusion; and iii)  
32  
33 assessing pharmacological risk factors for delirium before querying physicians about  
34  
35 consequent planned medication change. There also was inadequate rate and timeliness of  
36  
37 completion of the primary measure, the Confusion Assessment Method. While adherence to  
38  
39 the intervention was greater than 80%, there was no difference in overall use of psychoactive  
40  
41 medication between the two arms. Given that such medication is associated with  
42  
43 delirium,<sup>17,18</sup> this factor may partly explain the study's negative results.<sup>16</sup>  
44  
45  
46  
47

48  
49 There are possible barriers to implementation of non-pharmacological delirium prevention  
50  
51 strategies for people with advanced cancer. These include their common frailty and fatigue  
52  
53 which reduces capacity to participate in activities such as exercise. Patients and family may  
54  
55 not realise the serious risks associated with an episode of delirium, or prioritise prevention  
56  
57 strategies without this knowledge. Some clinicians may perceive that delirium is inevitable  
58  
59



The PRESERVE pilot study

and innocuous in advanced cancer and palliative care contexts;<sup>19,20</sup> and presume that preventing delirium is not possible, necessary or likely to be effective. Clinicians historically have relied on pharmacological intervention for delirium, rather than intentionally striving to prevent delirium through non-pharmacological means. With competing demands and without evidence of effectiveness, hospital managers may not value the importance of preventing delirium or allocate the required resources or personnel for non-pharmacological strategies, particularly for people approaching the end of their life.

Based on the body of research conducted with older people in hospital described above,<sup>9,14</sup> we hypothesised that a similar multicomponent intervention would reduce delirium incidence and/or decrease its duration and severity for inpatients with advanced cancer. Given the noted possible barriers to implementation in this specific patient group, piloting the intervention and study design was required prior to testing the hypothesis in a phase III (efficacy) trial.

## **Aim**

To determine if a multicomponent non-pharmacological delirium prevention intervention is feasible and acceptable for inpatients with advanced cancer.

## **Methods and analysis**

### **Design**

A phase II, cluster randomised controlled trial (RCT) with a waitlist control.<sup>21</sup> Participating sites will be randomised to the intervention (screening and immediate implementation of intervention) or control (screening and waitlist to the modified-intervention) (Figure 1).

The use of this design in the phase II trial was to inform the feasibility and design, delivery methods and power calculations of a future multi-site phase III cluster RCT. A cluster approach was chosen because the proposed intervention is more suited to implementation at a site level, and a traditional RCT design would risk contamination in the control arm. The use

1 The PRESERVE pilot study

2  
3 of a cluster RCT design is an advance on prior studies of non-pharmacological prevention  
4 interventions that used non-randomised designs. A waitlist control arm was chosen as key  
5 stakeholders at interested sites considered that the delirium prevention strategies were  
6 important, that participation in a trial that enabled access to the intervention was more  
7 appealing and ethically sound, and that the intervention strategies were well established as  
8 effective in other hospital settings and the potential benefits were clear, in principle. The  
9 waitlist control adds to the resource and time requirements of the trial, but will allow the  
10 intervention and study processes to be modified and/or refined at the two waitlist control  
11 sites, should initial results indicate that this is required.<sup>21</sup>

### 22 **Sites (clusters) and patient population**

23  
24 The participating sites are four Australian palliative care units, where approximately 75% of  
25 patients have a primary diagnosis of advanced cancer.<sup>22</sup>

26  
27 In line with the cluster RCT design, consent to participate was obtained at the site level from  
28 the person with the delegation to approve participation. Data will be collected for all  
29 admitted patients aged  $\geq 18$  years with a diagnosis of advanced cancer, for which no  
30 individual patient consent will be required.

### 31 **Intervention**

32  
33 Intervention sites will implement i) delirium screening; ii) delirium diagnosis assessments;  
34 and iii) the multicomponent delirium prevention intervention.

35  
36 Bedside nurses will undertake the Nursing Delirium Screening Scale (Nu-DESC)<sup>23</sup> for all  
37 eligible patients at the end of every shift. Within 24 hours of the patient assessed as having a  
38 Nu-DESC score  $\geq 2$ , a trained physician will apply Diagnostic and Statistical Manual of  
39 Mental Disorders, Fifth edition (DSM-5) diagnostic criteria for delirium,<sup>1</sup> operationalised

The PRESERVE pilot study

using the Delirium Rating Scale-Revised-1998 (DRS-R-98).<sup>24</sup> These processes currently are not routine at the participating sites and therefore will be additional to usual care.

The multicomponent delirium prevention intervention involves five domains of care that, when delivered in combination, significantly reduced delirium incidence in older hospitalised patients in previous clinical trials.<sup>9,14</sup> We added family partnership as an additional domain, as it was recommended by our consumer investigators and an expert working group, is highly valued by patients and family members,<sup>5,25</sup> and identified as essential by the Australian Commission for Safety and Quality in Healthcare (ACSQHC) in a new Delirium Standard, if preferred by the patient.<sup>26</sup>

The delirium prevention intervention will be delivered to all eligible patients from admission until discharge or death by members of the interdisciplinary team and volunteers. The domains and strategies of the multicomponent intervention are presented in Table 1.

Control sites will initially implement only delirium screening and diagnosis. Once the intervention sites achieve their sample, control sites will implement the intervention.

All sites will continue usual care with respect to treatment of patients with delirium.

## The PRESERVE pilot study

**Table 1: Multicomponent delirium prevention intervention**

| Domain                                           | Strategies                                                                                                                                                                                                                                                                                                                                                                                                                                                                                                                                                                                                              | Implementation                                                                                                                                                                                                                                                                                                                                                                                                                                                                                                        |
|--------------------------------------------------|-------------------------------------------------------------------------------------------------------------------------------------------------------------------------------------------------------------------------------------------------------------------------------------------------------------------------------------------------------------------------------------------------------------------------------------------------------------------------------------------------------------------------------------------------------------------------------------------------------------------------|-----------------------------------------------------------------------------------------------------------------------------------------------------------------------------------------------------------------------------------------------------------------------------------------------------------------------------------------------------------------------------------------------------------------------------------------------------------------------------------------------------------------------|
| Preserve natural sleep                           | <ul style="list-style-type: none"> <li>• Offer ear plugs to patients who have low risk of falls</li> <li>• Offer eye shades to patients who have low risk of falls</li> <li>• Reduce noise outside patient rooms during 21:00-06:00</li> <li>• Normal day-night light variation in room and unit</li> <li>• Exposure to natural light during daylight hours</li> <li>• Schedule care activities to allow uninterrupted sleep during the night</li> <li>• Avoid caffeine after 4pm</li> </ul>                                                                                                                            | <ul style="list-style-type: none"> <li>• The patient wears ear plugs at night</li> <li>• The patient wear eye shades at night</li> <li>• Room curtains/blinds are open during the day</li> <li>• Room lights are off or minimised at night</li> <li>• The patient spends time outside during the day</li> <li>• The patient drinks no caffeinated drinks after 4pm</li> <li>• The patient reports uninterrupted night-time sleep</li> </ul>                                                                           |
| Maintain optimal sensory perception              | <ul style="list-style-type: none"> <li>• Assess hearing</li> <li>• Assist with and re-inforce use of hearing aids and special communication techniques</li> <li>• Ear wax clearing as needed</li> <li>• Assess need for visual aids (glasses, magnifying lenses)</li> <li>• If needed, ask family to provide for the patient;</li> <li>• Assist with and reinforce use of visual aids</li> </ul>                                                                                                                                                                                                                        | <ul style="list-style-type: none"> <li>• The patient has their hearing assessed</li> <li>• The patient has ear wax cleaning</li> <li>• The patient wears functioning hearing aids</li> <li>• The patient has their vision assessed</li> <li>• The patient wears their glasses appropriately</li> <li>• The patient uses visual aids</li> </ul>                                                                                                                                                                        |
| Optimise hydration                               | <ul style="list-style-type: none"> <li>• Encourage oral fluids</li> <li>• Physical assistance with drinks and meals, as required</li> <li>• Drinking aids, as required</li> <li>• Be alert and respond to reversible causes of poor oral intake within 24 hours e.g. nausea, vomiting, drowsiness, sore mouth</li> </ul>                                                                                                                                                                                                                                                                                                | <ul style="list-style-type: none"> <li>• The patient is encouraged to drink</li> <li>• The patient is assisted with meals</li> <li>• Drinking aids are provided e.g. straws</li> <li>• Intervention for reversible causes of poor oral intake are in place</li> </ul>                                                                                                                                                                                                                                                 |
| Promote communication, orientation and cognition | <ul style="list-style-type: none"> <li>• Interpreter and translation for people with NESB</li> <li>• Greet the patient by name</li> <li>• Introduce self by name and role</li> <li>• Refer to person, time and place when talking with the patient</li> <li>• Time aids in room e.g. watch, personal or wall clock; wall, desk or electronic calendar</li> <li>• Update in-room whiteboards daily with date, day, place, reason for admission, team member names, schedule</li> <li>• Minimise number of transfers to other beds or rooms within the unit</li> <li>• Discuss current events with the patient</li> </ul> | <ul style="list-style-type: none"> <li>• Interpreter is available and used</li> <li>• Orientating information is translated into the patient's native language</li> <li>• The patient can see the time, day, date and month in their room</li> <li>• The patient remains in the same bed location within the unit</li> <li>• The patient discusses current events</li> <li>• The patient reminisces and/or talks about their life and family</li> <li>• The patient spends time in cognitively stimulating</li> </ul> |

The PRESERVE pilot study

|                    |                                                                                                                                                                                                                                                                                                                                                                                                                                                                                                                                                                                                                                                                                                                                                                                                                                                                                                                                                                  |                                                                                                                                                                                                                                                                                                                                                                |
|--------------------|------------------------------------------------------------------------------------------------------------------------------------------------------------------------------------------------------------------------------------------------------------------------------------------------------------------------------------------------------------------------------------------------------------------------------------------------------------------------------------------------------------------------------------------------------------------------------------------------------------------------------------------------------------------------------------------------------------------------------------------------------------------------------------------------------------------------------------------------------------------------------------------------------------------------------------------------------------------|----------------------------------------------------------------------------------------------------------------------------------------------------------------------------------------------------------------------------------------------------------------------------------------------------------------------------------------------------------------|
|                    | <ul style="list-style-type: none"> <li>• Encourage the patient to reminisce and talk</li> <li>• Encourage the patient to engage in cognitively stimulating activities</li> </ul>                                                                                                                                                                                                                                                                                                                                                                                                                                                                                                                                                                                                                                                                                                                                                                                 | <ul style="list-style-type: none"> <li>activities e.g. reading, puzzles, games, knitting, music</li> <li>• Cognitive stimulating activities are in the patient’s care plan</li> </ul>                                                                                                                                                                          |
| Optimise mobility  | <ul style="list-style-type: none"> <li>• Minimise use of tethers e.g. intravenous line, indwelling catheter, drain, oxygen</li> <li>• Minimise use of physical restraints e.g. bed rails, lock-in chair tables, vest restraints, limb restraints</li> <li>• Encourage and/or assist the patient to undertake physical activity throughout the day according to their capacity             <ul style="list-style-type: none"> <li>○ Level 0: No activity planned (state reason),</li> <li>○ Level 1: Active range of movement exercises in bed and/or sitting position in bed e.g. regular bed adjustment, assistance with re-positioning</li> <li>○ Level 2: Assistance to sit on the side of the bed</li> <li>○ Level 3: Sitting out of bed in a chair, standing</li> <li>○ Level 4: Walking (marching in place, independent or assisted walking around room and unit)</li> <li>○ Level 5: Attend inpatient gym, walking outside of unit</li> </ul> </li> </ul> | <ul style="list-style-type: none"> <li>• The patient is free of tethers</li> <li>• The patient is free of physical restraint</li> <li>• The patient moves and/or exercises to their optimal capacity</li> </ul>                                                                                                                                                |
| Family partnership | <ul style="list-style-type: none"> <li>• Ask family about the patient’s baseline cognition</li> <li>• Inform the patient and family about delirium risk</li> <li>• Inform the patient and family about delirium prevention strategies and invite participation</li> </ul>                                                                                                                                                                                                                                                                                                                                                                                                                                                                                                                                                                                                                                                                                        | <ul style="list-style-type: none"> <li>• Family are asked about the patient’s baseline cognition on admission</li> <li>• Delirium information brochure is provided to the patient and family</li> <li>• Verbally inform of delirium risk and prevention</li> <li>• Patients and family are invited to participate in delirium prevention strategies</li> </ul> |

1 The PRESERVE pilot study

2  
3 **Site engagement, education and training**

4  
5  
6 The phase II trial will not pre-determine delivery methods for the intervention, instead  
7  
8 observing the methods of each site. Engagement of site staff and volunteers will be guided by  
9  
10 Michie's Behaviour Change Wheel (BCW), an evidenced-based framework for changing  
11  
12 health-related behaviours.<sup>27</sup> Each site will form an interdisciplinary working group of  
13  
14 medical, nursing, allied health, pastoral care, volunteer coordinator and managerial staff. The  
15  
16 function of the working groups will be to determine how to deliver the intervention with the  
17  
18 available resources, composition and capabilities of their site team.<sup>27</sup> Working group  
19  
20 members will communicate the study to the whole team, promote the delirium screening,  
21  
22 diagnosis and prevention strategies, and inform patients and family about delirium and the  
23  
24 prevention strategies. Site teams will be encouraged to tailor the intervention strategies to  
25  
26 each patient's assessed needs and preferences to ensure person-centred care, as well as to  
27  
28 adopt simple and feasible methods of delivery and documentation of the intervention.  
29  
30

31  
32  
33 Education and training of site staff and volunteers in the delirium screening and prevention  
34  
35 strategies will be standardised, interdisciplinary and based on Biggs' educational model.<sup>28,29</sup>

36  
37 This model will align educational objectives and methods with the delirium learning needs of  
38  
39 staff, and promote critical reflection on attitudes, practice and functional knowledge of the  
40  
41 complexities of caring for a person with advanced cancer in hospital.<sup>28,29</sup> Education and  
42  
43 training will take place for two-months prior to data collection. A brief, simple study  
44  
45 overview manual also will be developed.  
46  
47

48  
49 Study investigators and/or project staff will attend sites to: i) promote fidelity to the study  
50  
51 processes and aims; ii) assist with education and training activities; iii) resolve issues that  
52  
53 delay implementation of the intervention or threaten its integrity; iv) act as a 'delirium  
54  
55 resource person'; and v) support and encourage site staff and volunteer participation in the  
56  
57 intervention.  
58  
59

1 The PRESERVE pilot study

2  
3 The frequency, duration and mode of administration of education and training will be  
4  
5 determined prior to implementing delirium screening, diagnosis and prevention strategies in  
6  
7 collaboration with participating sites, then standardised for each. Based on the learnings  
8  
9 obtained in this phase II trial, we will develop a replicable standardised education resource  
10  
11 for the phase III trial.  
12

### 13 14 **Randomization**

15  
16 Randomization of sites will take place after Human Research Ethics Committee (HREC) and  
17  
18 local governance approvals are obtained. In keeping with the method of the anticipated phase  
19  
20 III trial, we will use a permuted block randomisation method with various block sizes to  
21  
22 allocate sites to the intervention or waitlist control. Randomisation will be performed by the  
23  
24 study statistician (LL) from the coordinating centre, the University of Technology Sydney  
25  
26 (UTS).  
27  
28

### 29 30 **Blinding and avoidance of contamination**

31  
32 The study design and nature of the intervention means that blinding of site staff will not be  
33  
34 possible. Written information for patients and family caregivers will provide only general  
35  
36 information about the study aims, rather than specifics of the design or site allocation.  
37  
38 Attention will be focused on research nurse training and standardization of data collection to  
39  
40 limit the potential for bias.  
41  
42

43  
44 To avoid contamination between sites, personnel collecting data at an intervention site will  
45  
46 not collect data in a control site, and vice versa. Site investigators, research nurses and  
47  
48 project staff will be asked not to discuss the intervention in joint tele-meetings with control  
49  
50 sites. Clinicians at control sites initially will receive information and training on delirium  
51  
52 screening and diagnosis only, and only general information about the prevention intervention  
53  
54 in discussions and promotion, until they move into the intervention phase.  
55  
56  
57  
58  
59  
60

1 The PRESERVE pilot study

2  
3 **Data collection**

4  
5 Research nurses will collect baseline data from sites' most recent Palliative Care Outcomes  
6 Collaborative (PCOC) report (a national program which measures and benchmarks patient  
7 outcomes in palliative care using standardised clinical assessment tools)<sup>23</sup> (Figure 2) and  
8 from key personnel. Research nurses will screen consecutively admitted patients for  
9 eligibility, collect delirium screening and diagnostic assessment measures for enrolled  
10 patients and record these in a Case Report Form (CRF). At intervention sites, specially  
11 designed checklists will capture family caregivers, staff and volunteers' delivery (or  
12 otherwise) of delirium prevention strategies within each domain of the multicomponent  
13 intervention (Table 1), as well as who delivered it. Whenever the patient does not receive the  
14 strategy, the reason will be recorded according to the following categories:  
15  
16  
17  
18  
19  
20  
21  
22  
23  
24  
25

- 26 • Not required
- 27
- 28 • Patient choice
- 29
- 30 • Not clinically appropriate
- 31
- 32 • Not possible with current resources
- 33
- 34 • Other
- 35
- 36
- 37

38  
39 At study completion, the project team will collect PCOC data for the study time-frame (Age,  
40 Gender, Country of birth, Preferred language, Aboriginal or Torres Strait Islander status,  
41 Primary diagnosis, Length of stay, Performance status [Australian-modified Karnofsky  
42 Performance Status (AKPS)<sup>30</sup> and Resource Utilisation Groups - Activities of Daily Living  
43 (RUG-ADL)],<sup>31</sup> Palliative care phase).<sup>32</sup>  
44  
45  
46  
47  
48  
49

50 **Assessments**

51  
52 Figure 2 gives the schedule of study measures and time points; Text Box 1 provides  
53 information on the palliative care and delirium measures.  
54  
55  
56  
57  
58  
59  
60



## The PRESERVE pilot study

**Text Box 1: Description of study measures**

The **Australian-modified Karnofsky Performance Status (AKPS)** was adapted from the Karnofsky Performance Status with good face validity and longitudinal test-retest reliability.<sup>30</sup> The AKPS measures patients' overall performance status, using 10-point increments along a scale of 100-10. A score of 100 denotes normal function with no evidence of disease, decreasing to a minimum score of 10, assigned when patients are comatose or barely rousable. Routinely applied on an at least daily basis in most Australian inpatient unit palliative care services. The AKPS will be used to report the patient cohort's performance status at participating sites.

The **Resource Utilisation Groups - Activities of Daily Living (RUG-ADL)**<sup>31</sup> is a validated functional assessment tool which assigns a score of 4-18, based on what a patient does in relation to bed mobility, transfers, eating and toileting, rather than they can do. Higher scores indicate the need for more assistance to undertake activities and that more resources are required to provide this assistance. Applied on an at least daily basis in most Australian inpatient unit palliative care services. The measure will be used to report the patient cohort's functional status at participating sites.

The **Palliative Care Phase**<sup>32</sup> classification is not a validated tool, but is applied on an at least daily basis in most Australian palliative care services to describe the needs of the patient and family and prompt a timely and appropriate clinical response. Phases are: 1. Stable (problems and symptoms are adequately managed and there is a plan of care); 2. Unstable (urgent intervention required because a new symptom or problem develops, or an existing problem rapidly escalates); 3. Deteriorating (a gradual decline in function AND worsening of an existing problem or development of a new but anticipated problem); 4. Terminal (death is likely within days); and 5. Bereavement (post death support). The measure will be used to report the patient cohort's palliative care needs at participating sites.

The **Nursing Delirium Screening Scale (Nu-DESC)**<sup>24</sup> was validated in an oncology inpatient population with a sensitivity of 85.7% and specificity of 86.8%.<sup>24</sup> It is a brief (less than one minute) five-item and low burden tool, incorporating nurses' observation of disorientation, inappropriate behavior, inappropriate communication, illusions/hallucinations and psychomotor retardation. Nurses assign a score of 0–2 for each item, giving a maximum score of 10. The psychomotor retardation item improves recognition of hypoactive delirium,<sup>33</sup> the most prevalent subtype in palliative care inpatient populations.<sup>3</sup> The Nu-DESC has been used in previous research in inpatient palliative care populations<sup>11</sup> and considered feasible and acceptable by palliative care nurses.<sup>19</sup> The Nu-DESC will be used by bedside nurses to screen patients for delirium every eight-hour shift.

The **DSM-5 diagnostic criteria for delirium** are within the most current version of the American Psychiatric Association: Diagnostic and Statistical Manual of Mental Disorders.<sup>1</sup> Criteria are: A.

## The PRESERVE pilot study

1  
2  
3 Disturbed attention and awareness; B. Disturbance developed over a short period of time (usually  
4 hours to a few days), is a change from baseline attention and awareness, and fluctuates in severity; C.  
5 An additional disturbance in cognition; D. Disturbances in A and C are not caused by another  
6 neurocognitive disorder nor occur in the context of severely reduced level of arousal; and E. The  
7 disturbance is a direct physiological consequence of another medical condition, substance  
8 intoxication or withdrawal, exposure to a toxin, or has multiple aetiologies. Treating physicians will  
9 use the DSM-5 to determine a delirium diagnosis.  
10  
11  
12

13 The **Delirium Rating Scale-Revised-98 (DRS-R-98)**<sup>25</sup> is a 16-item delirium severity and diagnostic  
14 scale with scores of up to 46. It had high inter-rater reliability, sensitivity and specificity in the  
15 original validation study,<sup>25</sup> high sensitivity and adequate internal consistency and factor validity in  
16 cancer patients,<sup>34</sup> and has been used in research with palliative care inpatients.<sup>35,36</sup> The DRS-R-98 was  
17 designed to measure a wider range of delirium symptoms than are contained within diagnostic criteria  
18 and in different settings had good discriminative capacity for all, including in a patient population  
19 with a high prevalence of dementia<sup>37,38</sup>. Severity items are: sleep-wake cycle disturbance; perceptual  
20 disturbances and hallucinations; delusions; lability of affect; language; thought process abnormalities;  
21 motor agitation; motor retardation; orientation; attention; short-term memory; long-term memory;  
22 visuospatial ability. Diagnostic items are temporal onset of symptoms; fluctuation of symptom  
23 severity; physical disorder. Information is obtained from all sources, including physical examination,  
24 history gathering and formal cognitive testing. Requires clinician training, with guidance for use  
25 contained within the tool. Trained treating physicians and nurses will use the DRS-R-98 to  
26 operationalize delirium diagnosis and measure delirium severity. We will use a diagnostic cut-off  
27 score of  $\geq 15$ .<sup>38</sup>  
28  
29  
30  
31  
32  
33  
34  
35  
36  
37  
38  
39  
40  
41  
42  
43  
44  
45  
46  
47  
48  
49  
50  
51  
52  
53  
54  
55  
56  
57  
58  
59  
60

The PRESERVE pilot study

### Outcomes

The primary outcome is adherence to the intervention. A rate of at least 60% of patients having at least four completed domains for at least five of the first seven days of admission will be considered minimum evidence that the intervention is feasible without need for major modification of the intervention or its delivery methods. Endpoints will be at completion of the intervention and modified-intervention arms (Figure 1).

We chose this moderate endpoint because of the potential patient, clinician and system level challenges to the non-pharmacological strategies in the context of advanced cancer. Consensus by investigators was this endpoint would be the minimum to still have impact, realistic to achieve in practice, and ensure that further evaluation of this complex intervention was not prematurely stopped. The waitlist control design will allow two endpoints and thereby maximize the potential to reach this level of adherence to the intervention.

Secondary outcomes will further inform of the feasibility, acceptability and potential efficacy of a phase III trial of the intervention in this patient population and setting, as follows:

1. Coverage: delivery rate of the multicomponent intervention to consecutive eligible patients admitted to the unit, reasons why the intervention was not delivered, weekend coverage;
2. Fidelity to delirium screening, diagnosis and the intervention: degree of alignment with the protocol, rationales for adaptation, rate of protocol deviations without reasons;
3. Methods, areas and levels of interdisciplinary involvement in delivery of the intervention;
4. Feasibility and acceptability of the study intervention and measures for patients, caregivers, staff and volunteers, measured via brief interviews during and shortly after the intervention phase;

## The PRESERVE pilot study

5. Sustainability of the intervention: Adherence will be measured for all inpatients over one week, six months after commencement of data collection at the intervention sites;
6. Feasibility of the sample: percentage of participants included in data collection, reasons for non-inclusion, time to achieve sample size;
7. Number of people with advanced breast cancer admitted to the units, number of these who are in underserved populations (patients over 70, indigenous patients, and culturally and linguistically diverse backgrounds), and the number who experience an episode of delirium (total, and in under-served populations);
8. Percentage completion of all study measures;
9. Rate of patients with a positive delirium screen, measured according to a score of 2 or more on the Nu-DESC at least once during each 24-hour period;
10. Delirium incidence, measured at first onset according to the DSM-5 diagnostic criteria for delirium applied within 24-hours of a positive delirium screen;
11. Delirium severity measured at first onset, using the DRS-R-98;
12. Number of falls related to the intervention; and
13. Complaints related to the intervention.

### **Sub-study**

A qualitative sub-study will be conducted to obtain patient, family caregiver, staff and volunteer perceptions of the feasibility and acceptability of the intervention strategies, via brief interviews. (Figure 2)

### *Inclusion and exclusion criteria for the sub-study*

1. **Patients** will be included if they are aged 18 years or older; have a diagnosis of advanced cancer; admitted to an intervention site and received the intervention; speak English or have access to a health care interpreter; and able to give fully informed written consent. Patients with advanced breast cancer will be purposively recruited to

## The PRESERVE pilot study

1  
2  
3 participate in the interviews. Patients will be excluded if they have an AKPS<sup>30</sup> score  
4 less than 30 and are in the ‘terminal’ Palliative Care Phase;<sup>32</sup>  
5  
6

- 7  
8 2. **Family caregivers** will be included if they are aged 18 years or older; identified as a  
9 caregiver of a patient who received the intervention; English speaking or have  
10 availability of a health care interpreter; and are able to give fully informed written  
11 consent;  
12  
13 3. **Site staff** will be included if they are employed at an intervention site and involved in  
14 implementing the delirium measures and/or the intervention; and  
15  
16 4. **Site volunteers** will be included if they are aged 18 years or older, enrolled in a  
17 formal volunteer program at an intervention site and involved in implementing the  
18 intervention.  
19  
20  
21  
22  
23  
24  
25  
26  
27

*Sub-study consent process*

28  
29 A researcher who is not a study investigator will obtain written informed consent from  
30 patients, family caregivers, staff and volunteers to participate in the brief interviews. For  
31 patients and family caregivers, the researcher will check with the clinical team to make sure  
32 the person meets the broad criteria for consideration of eligibility, is well enough, and has  
33 given permission to be approached by a researcher, before introducing him or herself to the  
34 person and explaining the study. For staff and volunteers, the researcher will consult with the  
35 site investigator before approaching potential participants.  
36  
37  
38  
39  
40  
41  
42  
43  
44  
45

46 Participant consent will be a process of information exchange between the researcher, the  
47 potential participant and any other person the potential participant believes should be  
48 included in the discussion. Participant information sheets will be the basis for discussion and  
49 cover all procedures and possible benefits and burdens of participating. The potential  
50 participant will be given sufficient opportunity to consider the study and ask questions. Any  
51 questions will be addressed and answered fully. The completed consent form will be copied  
52  
53  
54  
55  
56  
57  
58  
59

1 The PRESERVE pilot study

2  
3 and one copy will be given to the participant, one copy inserted in the medical file (for  
4 patients), and one copy filed in study file.

## 8 **Analysis**

### 10 *Statistical analysis of primary outcome (adherence)*

11  
12  
13 Adherence will be calculated as the rate to which patients have completed domains on a daily  
14 basis for the first seven days of admission. Degree of adherence to individual strategies will  
15 also be calculated as proportions.  
16  
17

### 19 *Statistical analysis of secondary outcomes*

20  
21 Data on all outcomes will be summarised with descriptive statistics including their  
22 distribution. Frequency and percentage will be used for summarising categorical variables  
23 and mean, standard deviation, median, and interquartile range for continuous variables.  
24  
25  
26  
27  
28  
29  
30 Delirium incidence and severity will be determined at both the intervention and control sites.  
31

### 32 *Qualitative analysis*

33  
34  
35 Participant interviews will be analysed using thematic content analysis to identify emergent  
36 themes and trends related to participants' perceptions of the feasibility and acceptability of  
37 the intervention elements and delirium measures.<sup>39</sup>  
38  
39  
40  
41

### 42 *Sample size*

43  
44  
45 A sample size of four sites and 40 patient participants was considered sufficient for  
46 reasonable estimation of feasibility and percentage completion of study processes and  
47 measures during the first phase.<sup>40</sup> We will collect de-identified data on all eligible patients  
48 admitted to all sites until data is collected for 40 patients overall, with at least 20 in the  
49 intervention arm. If the intervention is found to need modification, data will be collected for a  
50 further 20 patient participants at the two waitlist control sites.  
51  
52  
53  
54  
55  
56  
57  
58

1 The PRESERVE pilot study

2  
3 This sample size was based on that projected for the future phase III cluster RCT of the  
4  
5 intervention with: two parallel arms, 50% delirium incidence in the control, 30% delirium  
6  
7 incidence in the intervention group, cluster size of 30 and intra-class correlation of 0.05, type  
8  
9 I error rate of 5%, 80% power to reject the null hypothesis, and 30% attrition. This  
10  
11 calculation results in a projected phase III trial sample size of nine clusters and 280 patient  
12  
13 participants.  
14

15  
16  
17 For the sub-study, sample size will be determined when data saturation is achieved.  
18

### 19 **Trial monitoring**

20 In addition to falls and complaints, all adverse events will be recorded. Site investigators will  
21  
22 assess the adverse event, assign the degree of relationship to the intervention, and provide  
23  
24 information to the coordinating centre (UTS), and the approving HREC if required. Adverse  
25  
26 events will be followed until the event is resolved, can be explained, or if the participant is  
27  
28 lost to follow-up. Reports will contain details of follow-up investigations, results or other  
29  
30 consultation. The investigator team will stop the study if reporting of adverse events indicates  
31  
32 that major review of the study protocol is required. The UTS project team will report adverse  
33  
34 event related to the intervention to the PaCCSC Trial Management Committee (TMC) within  
35  
36 two weeks of knowledge of the event. The TMC discussions will be minuted, with actions  
37  
38 detailed and reviewed at the subsequent meeting. The TMC chairperson's report to the  
39  
40 PaCCSC Scientific Committee will contain a summary of the discussions of the adverse  
41  
42 event report and agreed outcomes.  
43  
44  
45

### 46 **Data management**

47  
48  
49 An Excel spreadsheet master index will contain confidential participant contact information  
50  
51 and be the only link between individual site and patient participants and their allocated  
52  
53 identification number (ID). Study data will be collected and stored on paper CRFs and  
54  
55 electronic Excel spreadsheets and then entered onto and managed on a Research Electronic  
56  
57  
58  
59

## The PRESERVE pilot study

1  
2  
3 Data Capture (REDCap)<sup>41</sup> database. Audio data from participant interviews will be  
4  
5 identified only by ID, collected on a digital recording medium and stored temporarily at the  
6  
7 study sites until uploaded to the REDCap database. Original files will then be destroyed.  
8  
9 Data will be held, administered, checked and analysed at the coordinating site according to  
10  
11 relevant PaCCSC Standard Operating Procedures (SOP). Errors detected during the data  
12  
13 checking process will generate a site data report form recording details of the query and  
14  
15 correction and resolution instructions. The database will be updated according to site  
16  
17 instructions via email to provide an audit trail of data changes. The coordinating site will  
18  
19 maintain a register of data checks for monitoring purposes. Data collected at each site, such  
20  
21 as CRFs, any corrected and amended data, copies of adverse incident reports and file notes,  
22  
23 will be securely stored and identified by ID number only. All identifiable data (e.g. signed  
24  
25 consent forms) will be separately stored during the recruitment period. Site research staff  
26  
27 will send copies of study documents (with the exception of signed consent forms) to the  
28  
29 coordinating site by registered mail for collation and archiving. All study documents will be  
30  
31 stored in accordance with relevant State government regulations regarding the retention and  
32  
33 disposal of participant records.  
34  
35  
36  
37  
38  
39  
40  
41  
42  
43  
44  
45  
46  
47  
48  
49  
50  
51  
52  
53  
54  
55  
56  
57  
58  
59  
60



The PRESERVE pilot study

## **Ethics and dissemination**

The study was approved by the South Western Sydney Local Health District HREC on July 19, 2017, reference number HREC/17/LPOOL/224; and ratified by the UTS HREC on August 22, 2017, reference number ETH17-1697. Minor protocol amendments were approved on April 13, 2018 (V1.1).

Reporting of this protocol adheres to the Standard Protocol Items: Recommended for Interventional Trials.<sup>42</sup> Reporting of results will adhere to the Consolidated Standards of Reporting Trials (CONSORT) guidelines for cluster RCTs and non-pharmacological treatment trials.<sup>43,44</sup> Reporting of the qualitative sub-study and implementation findings will be guided by the Consolidated Criteria for Reporting Qualitative Research (COREQ).<sup>45</sup> A comprehensive dissemination strategy will ensure that the trial results (either positive or negative) inform future research and clinical practice. Dissemination will include publication in peer-reviewed journals, presentations at conferences, study sites and key peak bodies. The investigators have no publication restrictions.

### **Strengths and limitations**

The primary strengths of this study are the cluster RCT design and that it is supported by the PaCCSC, a national, multi-site phase III clinical trials group which provides well-established rigorous research governance and access to sites with research experience and capacity. The intervention includes family partnership, which is highly valued by both patients and family.<sup>5,26</sup> We will obtain the perspectives of patients and family, which are largely absent in trials of previous multicomponent delirium interventions.<sup>15</sup>

Limitations include that site and research staff will not be blinded to the intervention. Active steps will be taken to minimize contamination between intervention and waitlist control sites.

The study will be conducted in Australian palliative care inpatient settings and include only

1 The PRESERVE pilot study

2 patients with advanced cancer, limiting the generalizability of results for services in other  
3 geographical regions and health care systems, and for patients with other advanced illnesses.  
4  
5  
6  
7

## 8 **Trial status**

9  
10  
11 The study has been approved by local health district and university HRECs, local governance  
12 approvals obtained, sites randomised, the two-month period completed and data collection is  
13 underway.  
14  
15  
16  
17

## 18 **List of abbreviations**

19  
20  
21 **AKPS**: Australia-modified Karnofsky Performance Status; **ACSQHC**: Australian  
22 Commission for Safety and Quality in Health Care; **BCW**: Behaviour Change Wheel; **CI**:  
23 Confidence Interval; **CONSORT**: Consolidated Standards of Reporting Trials; **COREQ**:  
24 Consolidated Criteria for Reporting Qualitative Research; **DRS-R-98**: Delirium Rating  
25 Scale-Revised-1998; **DSM-5**: Diagnostic and Statistical Manual of Mental Disorders, Fifth  
26 edition; **HREC**: Human Research Ethics Committee; **ID**: identification number; **Nu-DESC**:  
27 Nursing Delirium Screening Scale; **OR**: Odds Ratio; **PaCCSC**: Palliative Care Clinical  
28 Studies Collaborative; **PCOC**: Palliative Care Outcomes Collaborative; **RCT**: Randomised  
29 Controlled Trial; **REDCap**: Research Electronic Data Capture; **RR**: Relative Risk; **RUG-**  
30 **ADL**: Resource Utilisation Groups - Activities of Daily Living; **SOP**: Standard Operating  
31 Procedures; **UTS**: University of Technology Sydney  
32  
33  
34  
35  
36  
37  
38  
39  
40  
41  
42  
43  
44  
45

## 46 **Declarations**

### 47 *Clinical trials registration*

48  
49 ACTRN12617001070325p, Australian New Zealand Clinical Trials Registry (ANZTR),  
50 <http://www.anzctr.org.au/>, 24/07/2017. The ANZTR is a Primary Registry of the World  
51 Health Organization International Clinical Trials Registry Platform (WHO ICTRP).  
52  
53  
54  
55  
56  
57  
58  
59  
60

1 The PRESERVE pilot study

2  
3 *Consent for publication*

4 Participant information includes an explanation that results will be published in a form that  
5 maintains the confidentiality of sites and individual participants.  
6  
7

8  
9  
10 *Availability of data and material*

11 Participant information sheets and consent forms are available at

12 <https://www.anzctr.org.au/Trial/Registration/TrialReview.aspx?id=373168&isReview=true>  
13  
14

15  
16 *Funding*

17 This work was supported by an Australian National Breast Cancer Foundation (NBCF) 2017  
18

19 Pilot Study Grant (Grant code PS-17-030), contact details Level 9, 10 Barrack Street,  
20

21 Sydney, NSW 2000, Australia; T: +61 2 8098 4800 E: [info@nbcf.org.au](mailto:info@nbcf.org.au), W:  
22

23 <https://nbcf.org.au/>.  
24  
25

26  
27 *Competing interests*

28 The authors declare that they have no competing interests.  
29  
30

31  
32 *Sponsor*

33 The trial sponsor is PaCCSC, contact details: Level 3, 235 Jones St Ultimo NSW 2007,  
34

35 Australia; T. +61 (2) 9514 4862 (Sydney) /+61 (8) 7421 9726 (Adelaide),  
36

37 E: [paccsc@uts.edu.au](mailto:paccsc@uts.edu.au), W: [uts.edu.au/paccsc](http://uts.edu.au/paccsc). PaCCSC supports optimal trial governance  
38

39 through SOPs for electronic data handling, completion of CRFs, monitoring, dissemination,  
40

41 archiving of research materials, and record destruction; and trial infrastructure through Trials  
42

43 Management and Scientific Committees.  
44  
45

46  
47 *Roles and responsibilities*

48 Chief study investigators MA, AH and JP retain ultimate responsibility for the trial.  
49

50 Investigators and a project team coordinated the trial from IMPACCT - Improving Palliative,  
51

52 Aged and Chronic Care through Clinical Research and Translation, UTS. The investigator  
53

54 team meet at least twice yearly to support progress of the trial and inform related activities,  
55

56 such as dissemination.  
57  
58

The PRESERVE pilot study

## **Authors' contributions**

AH, MA and JP are the co-lead authors and AH is the corresponding author for this manuscript. MA, JP and AH devised the adaptation of the multicomponent intervention for people with advanced cancer in hospital. MB and BN provided consumer insight into the adaptation of the intervention. AC provided guidance on the extent of alignment of the intervention and delirium screening diagnosis processes with the ACSQHC Delirium Clinical Care Standard. LL devised the statistical analysis and randomization process. JMD and ML provided insights into the waitlist design. SK contributed to the development of the site engagement and educational processes. SK, GC, RC, BL, EWE, PL and SB contributed clinical and research expertise into study design, process, measures and/or analysis. LB, BF, SLC and LE contributed to various aspects of the study protocol, including data collection, entry and storage, reporting of adverse effects, minimization of contamination, and/or site training. All authors have read and approved the final manuscript.

## **Acknowledgements**

The authors gratefully acknowledge Associate Professor Andrew Teodorczuk, Dr Aileen Collier, Ms Bronwyn Heron and Dr Christine Sanderson who contributed clinical and research expertise to the development of the non-pharmacological delirium prevention intervention.

## The PRESERVE pilot study

**References**

1. American Psychiatric Association. *Diagnostic and Statistical Manual of Mental Disorders, Fifth Edition (DSM-5)*. Arlington, VA: American Psychiatric Publisher; 2013.
2. Lawlor PG, Gagnon B, Mancini IL, et al. Occurrence, causes, and outcome of delirium in patients with advanced cancer: a prospective study. *Archives of Internal Medicine*. 2000;160(6):786-794.
3. Hosie A, Davidson PM, Agar M, Sanderson CR, Phillips J. Delirium prevalence, incidence, and implications for screening in specialist palliative care inpatient settings: A systematic review. *Palliative Medicine*. 2013;27(6):486-498.
4. O'Malley G, Leonard M, Meagher D, O'Keefe ST. The delirium experience: a review. *Journal of Psychosomatic Research*. 2008;65(3):223-228.
5. Finucane AM, Lugton J, Kennedy C, Spiller JA. The experiences of caregivers of patients with delirium, and their role in its management in palliative care settings: an integrative literature review. *Psycho-Oncology*. 2017;26(3):291-300.
6. National Institute for Health and Clinical Excellence (NICE) National Clinical Guideline centre. Delirium: diagnosis, prevention and management. 2010; <http://www.nice.org.uk/nicemedia/live/13060/49908/49908.pdf>. Accessed July 13th, 2011.
7. Australian Commission on Safety and Quality in Health Care. Evidence for the safety and care of patients with a cognitive impairment in acute care settings: a rapid review. In. Sydney: ACSQHC; 2013.
8. Leslie DL, Marcantonio ER, Zhang Y, Leo-Summers L, Inouye SK. One-year health care costs associated with delirium in the elderly population. *Archives Internal Medicine*. 2008;168(1):27-32.
9. Siddiqi N, Harrison JK, Clegg A, et al. Interventions for preventing delirium in hospitalised non-ICU patients. *Cochrane Database of Systematic Reviews*. 2016(Issue 3. Art. No.: CD005563. ).
10. Neufeld KJ, Yue J, Robinson TN, Inouye SK, Needham DM. Antipsychotic Medication for Prevention and Treatment of Delirium in Hospitalized Adults: A Systematic Review and Meta-Analysis. *Journal of the American Geriatric Society*. 2016;64(4):705-714.
11. Agar M, Lawlor PG, Quinn S, et al. Efficacy of oral risperidone, haloperidol, or placebo for symptoms of delirium among patients in palliative care: A randomised clinical trial. *JAMA Internal Medicine*. 2017;177(1):34-42.
12. Lawlor PG, Davis DHJ, Ansari M, et al. An Analytic Framework for Delirium Research in Palliative Care Settings: Integrated Epidemiological, Clinician-Researcher and Knowledge User Perspectives. *Journal of Pain and Symptom Management*. 2014;48(2):159-175.
13. Hosie A, Agar M, Lobb E, Davidson PM, Phillips J. Improving delirium recognition and assessment for people receiving inpatient palliative care: a mixed methods meta-synthesis. *International Journal of Nursing Studies*. 2017;75:123-129.
14. Hshieh TT, Yue J, Oh E, et al. Effectiveness of multicomponent nonpharmacological delirium interventions: a meta-analysis. *JAMA Internal Medicine*. 2015;175(4):512-520.
15. Hosie A, Amgarth-Duff I, Edwards L, et al. Non-pharmacological delirium interventions for adult inpatients with advanced, progressive illness: a systematic review. American Delirium Society 7th Annual Meeting; 2017; Nashville, TN.

## The PRESERVE pilot study

16. Gagnon P, Allard P, Gagnon B, Mérette C, Tardif F. Delirium prevention in terminal cancer: assessment of a multicomponent intervention. *Psycho-Oncology*. 2012;21(2):187-194.
17. Lonergan E, Luxenberg J, Areosa Sastre A. Benzodiazepines for delirium. *Cochrane Database of Systematic Reviews*. 2009(4). <http://www.mrw.interscience.wiley.com/cochrane/clsysrev/articles/CD006379/frame.html>.
18. Caraceni A. Drug-associated delirium in cancer patients. *European Journal of Cancer Supplements*. 2013;11(2):233-240.
19. Hosie A, Lobb E, Agar M, Davidson PM, Chye R, Phillips J. Nurse perceptions of the Nursing Delirium Screening Scale in two palliative care inpatient units: a focus group study. *Journal of Clinical Nursing*. 2015;24(22-22):3276-3285.
20. Wright DK, Brajtman S, Cragg B, Macdonald ME. Delirium as letting go: An ethnographic analysis of hospice care and family moral experience. *Palliative Medicine*. 2015;29(10):959-966.
21. Higginson IJ, Booth S. The randomised fast-track trial in palliative care: role, utility and ethics in the evaluation of interventions in palliative care? *Palliative Medicine*. 2011;25(8):741-747.
22. Palliative Care Outcomes Collaborative. 2017; <http://www.pcoc.org.au/>. August 20, 2018.
23. Gaudreau JD, Gagnon P, Harel F, Tremblay A, Roy MA. Fast, systematic, and continuous delirium assessment in hospitalized patients: the nursing delirium screening scale. *Journal of Pain and Symptom Management*. 2005;29(4):368-375.
24. Trzepacz PT, Mittal D, Torres R, Canary K, Norton J, Jimerson N. Validation of the Delirium Rating Scale-revised-98: comparison with the delirium rating scale and the cognitive test for delirium.[erratum appears in J Neuropsychiatry Clin Neurosci 2001 Summer;13(3):433]. *Journal of Neuropsychiatry & Clinical Neurosciences*. 2001;13(2):229-242.
25. Virdun C, Luckett T, Davidson PM, Phillips J. Dying in the hospital setting: A systematic review of quantitative studies identifying the elements of end-of-life care that patients and their families rank as being most important. *Palliative Medicine*. 2015.
26. Australian Commission on Quality and Safety of Healthcare. Delirium Clinical Care Standard. 2017; <https://www.safetyandquality.gov.au/our-work/clinical-care-standards/delirium-clinical-care-standard/>. Accessed August 20, 2018.
27. Michie S, Stralen MM, West R. The behaviour change wheel: a new method for characterising and designing behaviour change interventions. *Implementation Science*. 2011;6.
28. Teodorczuk A, Mukaetova-Ladinska E, Corbett S, Welfare M. Learning about the patient: an innovative interprofessional dementia and delirium education programme. *Clinical Teaching*. 2014;11(7):497-502.
29. Walsh A. An exploration of Biggs' constructive alignment in the context of work-based learning. *Assessment & Evaluation in Higher Education*. 2007;32(1):79-87.
30. Abernethy A, Shelby-James T, Fazekas B, Woods D, Currow D. The Australia-modified Karnofsky Performance Status (AKPS) scale: a revised scale for contemporary palliative care clinical practice. *BMC Palliative Care*. 2005;4(7):<http://www.biomedcentral.com/content/pdf/1472-1684X-1474-1477.pdf>.
31. Fries BE, Schneider DP, Foley WJ, Gavazzi M, Burke R, Cornelius E. Refining a casemix measure for nursing homes. Resource Utilisation Groups (RUG-III) *Medical Care*. 1994;32:668-685.

## The PRESERVE pilot study

- 1
- 2
- 3 32. Masso M, Allingham SF, Banfield M, et al. Palliative Care Phase: inter-rater
- 4 reliability and acceptability in a national study. *Palliative Medicine*. 2015;29(1):22-
- 5 30.
- 6 33. Gaudreau JD, Gagnon P, Harel F, Roy MA. Impact on delirium detection of using a
- 7 sensitive instrument integrated into clinical practice. *General Hospital Psychiatry*.
- 8 2005;27(3):194-199.
- 9 34. Grassi L, Caraceni A, Beltrami E, et al. Assessing delirium in cancer patients: the
- 10 Italian versions of the Delirium Rating Scale and the Memorial Delirium Assessment
- 11 Scale. *Journal of Pain and Symptom Management*. 2001;21(1):59-68.
- 12 35. Leonard M, Raju B, Conroy M, et al. Reversibility of delirium in terminally ill
- 13 patients and predictors of mortality. *Palliative Medicine*. 2008;22(7):848-854.
- 14 36. Leonard M, Spiller J, Keen J, MacLulich A, Kamholtz B, Meagher D. Symptoms of
- 15 depression and delirium assessed serially in palliative-care inpatients.
- 16 *Psychosomatics*. 2009;50(5):506-514.
- 17 37. Meagher DJ, Morandi A, Inouye SK, et al. Concordance between DSM-IV and DSM-
- 18 5 criteria for delirium diagnosis in a pooled database of 768 prospectively evaluated
- 19 patients using the delirium rating scale-revised-98. *BMC medicine*. 2014;12:164.
- 20 38. Sepulveda E, Franco JG, Trzepacz PT, et al. Performance of the Delirium Rating
- 21 Scale-Revised-98 Against Different Delirium Diagnostic Criteria in a Population
- 22 With a High Prevalence of Dementia. *Psychosomatics*. 2015;56(5):530-541.
- 23 39. Liamputtong P, Ezzy D. In-depth Interviews. In: *Qualitative Research Methods*. 2nd
- 24 ed. South Melbourne: Oxford University Press; 2005.
- 25 40. Cocks K, D.J. T. Sample size calculations for pilot randomised trials: a confidence
- 26 interval approach. *Journal of Clinical Epidemiology*. 2013;66(2):197-201.
- 27 41. Harris PA, Taylor R, Thielke R, Payne J, Gonzalez N, Conde JG. Research electronic
- 28 data capture (REDCap)—A metadata-driven methodology and workflow process for
- 29 providing translational research informatics support. *Journal of Biomedical*
- 30 *Informatics*. 2009;42(2):377-381.
- 31 42. Chan A, Tetzlaff JM, Altman DG, et al. SPIRIT 2013 statement: Defining standard
- 32 protocol items for clinical trials. *Annals of Internal Medicine*. 2013;158(3):200-207.
- 33 43. Boutron I, Moher D, Altman DG, Schulz KF, Ravaud P. Extending the CONSORT
- 34 statement to randomised trials of nonpharmacologic treatment: explanation and
- 35 elaboration. *Annals of Internal Medicine*. 2008;148(4):295-309.
- 36 44. Campbell MK, Piaggio G, Elbourne DR, Altman DG. Consort 2010 statement:
- 37 extension to cluster randomised trials. *BMJ*. 2012;345:e5661.
- 38 45. Tong A, Sainsbury P, Craig J. Consolidated criteria for reporting qualitative research
- 39 (COREQ): a 32-item checklist for interviews and focus groups. *International journal*
- 40 *for quality in health care : journal of the International Society for Quality in Health*
- 41 *Care / ISQua*. 2007;19.
- 42
- 43
- 44
- 45
- 46
- 47
- 48
- 49
- 50
- 51
- 52
- 53
- 54
- 55
- 56
- 57
- 58
- 59
- 60

The PRESERVE pilot study

1  
2  
3 **Figure 1: Study Diagram**

4 Standardised delirium screening at all sites + delirium prevention strategies at intervention  
5 sites; control sites wait listed for intervention  
6

7 \* Modified if required

8 **Figure 2: Schedule of study measures and time points** <sup>43</sup>  
9

10 Note: Characteristics indicated with a \* will be collected at baseline from the sites most  
11 recent PCOC report, and then again at study completion directly from PCOC for the specific  
12 time-frame of data collection at each site.  
13

14 **Table 1: Multicomponent delirium prevention intervention**  
15  
16  
17  
18  
19  
20  
21  
22  
23  
24  
25  
26  
27  
28  
29  
30  
31  
32  
33  
34  
35  
36  
37  
38  
39  
40  
41  
42  
43  
44  
45  
46  
47  
48  
49  
50  
51  
52  
53  
54  
55  
56  
57  
58  
59  
60



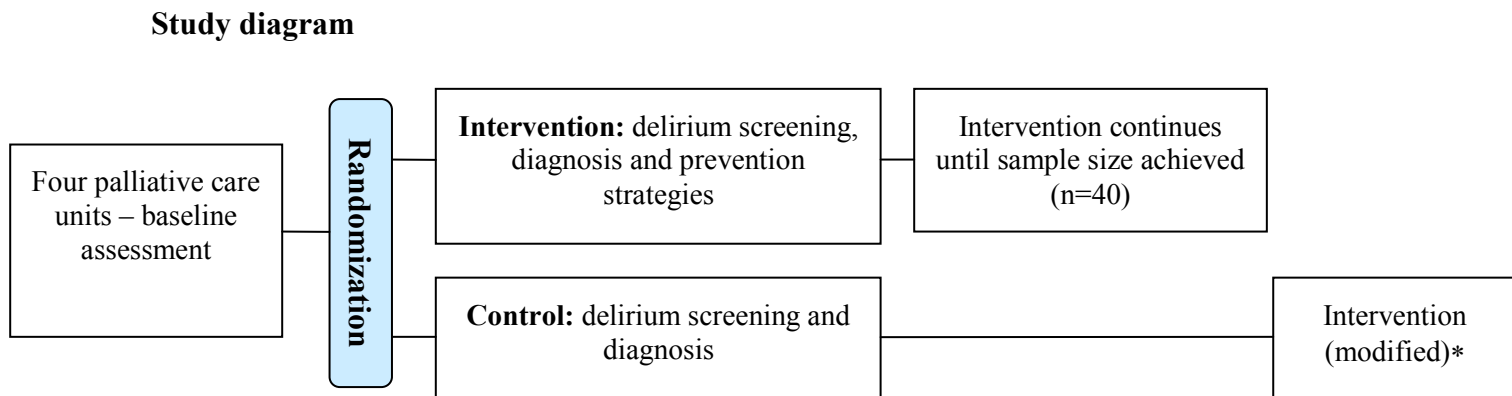

**Figure 1: Study Diagram**

Standardized delirium screening at all sites + delirium prevention strategies at intervention sites;  
control sites wait listed for intervention

\* Modified if required.

**Figure 2: Schedule of study measures and time points**<sup>42</sup>

| Measures                                                     | Study period                   |                                 |                    |             |                  |                    |                         |
|--------------------------------------------------------------|--------------------------------|---------------------------------|--------------------|-------------|------------------|--------------------|-------------------------|
|                                                              | Control and intervention sites |                                 |                    |             |                  | Intervention sites |                         |
|                                                              | Baseline                       | Eligibility screen on admission | Admission days 1-7 | Nu-DESC +ve | Study completion | Admission days 1-7 | Intervention completion |
| <b>UNIT LEVEL</b>                                            |                                |                                 |                    |             |                  |                    |                         |
| Geographical location                                        | X                              |                                 |                    |             |                  |                    |                         |
| Type and level of service provision                          | X                              |                                 |                    |             |                  |                    |                         |
| Number of beds                                               | X                              |                                 |                    |             |                  |                    |                         |
| Team composition                                             | X                              |                                 |                    |             |                  |                    |                         |
| Clinical documentation method                                | X                              |                                 |                    |             |                  |                    |                         |
| Delirium process and measures                                | X                              |                                 |                    |             |                  |                    |                         |
| Patient demographics*                                        | X                              |                                 |                    |             | X                |                    |                         |
| Patient function AKPS, RUG-ADL*                              | X                              |                                 |                    |             | X                |                    |                         |
| Palliative care phases*                                      | X                              |                                 |                    |             | X                |                    |                         |
| <b>PATIENT LEVEL</b>                                         |                                |                                 |                    |             |                  |                    |                         |
| Primary diagnosis                                            |                                | X                               |                    |             |                  |                    |                         |
| Age                                                          |                                | X                               |                    |             |                  |                    |                         |
| Nu-DESC                                                      |                                |                                 | X                  |             |                  |                    |                         |
| DSM-5 diagnostic criteria for delirium                       |                                |                                 |                    | X           |                  |                    |                         |
| DRS-R-98                                                     |                                |                                 |                    | X           |                  |                    |                         |
| Adherence to delirium prevention strategies                  |                                |                                 |                    |             |                  | X                  |                         |
| <b>SUB-STUDY</b>                                             |                                |                                 |                    |             |                  |                    |                         |
| Brief interviews with patients, family, staff and volunteers |                                |                                 |                    |             |                  |                    | X                       |

Note: Characteristics indicated with a \* will be collected at baseline from the sites most recent PCOC report, and then again at study completion directly from PCOC for the specific time-frame of data collection at each site.

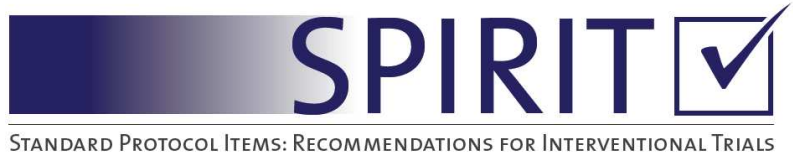

1  
2  
3  
4  
5  
6  
7  
8  
9  
10  
11  
12  
13  
14  
15  
16  
17  
18  
19  
20  
21  
22  
23  
24  
25  
26  
27  
28  
29  
30  
31  
32  
33  
34  
35  
36  
37  
38  
39  
40  
41  
42  
43  
44  
45  
46  
47

SPIRIT 2013 Checklist: Recommended items to address in a clinical trial protocol and related documents\*

| Section/item                      | Item No | Description                                                                                                                                                                                                                                                                              | Addressed on page number |
|-----------------------------------|---------|------------------------------------------------------------------------------------------------------------------------------------------------------------------------------------------------------------------------------------------------------------------------------------------|--------------------------|
| <b>Administrative information</b> |         |                                                                                                                                                                                                                                                                                          |                          |
| Title                             | 1       | Descriptive title identifying the study design, population, interventions, and, if applicable, trial acronym                                                                                                                                                                             | Title page               |
| Trial registration                | 2a      | Trial identifier and registry name. If not yet registered, name of intended registry                                                                                                                                                                                                     | 2 and 21                 |
|                                   | 2b      | All items from the World Health Organization Trial Registration Data Set                                                                                                                                                                                                                 | 21                       |
| Protocol version                  | 3       | Date and version identifier                                                                                                                                                                                                                                                              | 19                       |
| Funding                           | 4       | Sources and types of financial, material, and other support                                                                                                                                                                                                                              | 21                       |
| Roles and responsibilities        | 5a      | Names, affiliations, and roles of protocol contributors                                                                                                                                                                                                                                  | Title page               |
|                                   | 5b      | Name and contact information for the trial sponsor                                                                                                                                                                                                                                       | 21                       |
|                                   | 5c      | Role of study sponsor and funders, if any, in study design; collection, management, analysis, and interpretation of data; writing of the report; and the decision to submit the report for publication, including whether they will have ultimate authority over any of these activities | 21                       |
|                                   | 5d      | Composition, roles, and responsibilities of the coordinating centre, steering committee, endpoint adjudication committee, data management team, and other individuals or groups overseeing the trial, if applicable (see Item 21a for data monitoring committee)                         | 21-22                    |

## Introduction

|                          |    |                                                                                                                                                                                                           |     |
|--------------------------|----|-----------------------------------------------------------------------------------------------------------------------------------------------------------------------------------------------------------|-----|
| Background and rationale | 6a | Description of research question and justification for undertaking the trial, including summary of relevant studies (published and unpublished) examining benefits and harms for each intervention        | 3-5 |
|                          | 6b | Explanation for choice of comparators                                                                                                                                                                     | 5-6 |
| Objectives               | 7  | Specific objectives or hypotheses                                                                                                                                                                         | 5   |
| Trial design             | 8  | Description of trial design including type of trial (eg, parallel group, crossover, factorial, single group), allocation ratio, and framework (eg, superiority, equivalence, noninferiority, exploratory) | 5-6 |

## Methods: Participants, interventions, and outcomes

|                      |     |                                                                                                                                                                                                                                                                                                                                                                                |          |
|----------------------|-----|--------------------------------------------------------------------------------------------------------------------------------------------------------------------------------------------------------------------------------------------------------------------------------------------------------------------------------------------------------------------------------|----------|
| Study setting        | 9   | Description of study settings (eg, community clinic, academic hospital) and list of countries where data will be collected. Reference to where list of study sites can be obtained                                                                                                                                                                                             | 6        |
| Eligibility criteria | 10  | Inclusion and exclusion criteria for participants. If applicable, eligibility criteria for study centres and individuals who will perform the interventions (eg, surgeons, psychotherapists)                                                                                                                                                                                   | 6; 14-15 |
| Interventions        | 11a | Interventions for each group with sufficient detail to allow replication, including how and when they will be administered                                                                                                                                                                                                                                                     | 6-7      |
|                      | 11b | Criteria for discontinuing or modifying allocated interventions for a given trial participant (eg, drug dose change in response to harms, participant request, or improving/worsening disease)                                                                                                                                                                                 | 7-8      |
|                      | 11c | Strategies to improve adherence to intervention protocols, and any procedures for monitoring adherence (eg, drug tablet return, laboratory tests)                                                                                                                                                                                                                              | 7-8      |
|                      | 11d | Relevant concomitant care and interventions that are permitted or prohibited during the trial                                                                                                                                                                                                                                                                                  | NA       |
| Outcomes             | 12  | Primary, secondary, and other outcomes, including the specific measurement variable (eg, systolic blood pressure), analysis metric (eg, change from baseline, final value, time to event), method of aggregation (eg, median, proportion), and time point for each outcome. Explanation of the clinical relevance of chosen efficacy and harm outcomes is strongly recommended | 13-14    |
| Participant timeline | 13  | Time schedule of enrolment, interventions (including any run-ins and washouts), assessments, and visits for participants. A schematic diagram is highly recommended (see Figure)                                                                                                                                                                                               | Figure 2 |
| Sample size          | 14  | Estimated number of participants needed to achieve study objectives and how it was determined, including clinical and statistical assumptions supporting any sample size calculations                                                                                                                                                                                          | 16-17    |

|    |                                                                     |     |                                                                                                                                                                                                                                                                                                                                                                                                              |       |
|----|---------------------------------------------------------------------|-----|--------------------------------------------------------------------------------------------------------------------------------------------------------------------------------------------------------------------------------------------------------------------------------------------------------------------------------------------------------------------------------------------------------------|-------|
| 1  |                                                                     |     |                                                                                                                                                                                                                                                                                                                                                                                                              |       |
| 2  | Recruitment                                                         | 15  | Strategies for achieving adequate participant enrolment to reach target sample size                                                                                                                                                                                                                                                                                                                          | 16-17 |
| 3  |                                                                     |     |                                                                                                                                                                                                                                                                                                                                                                                                              |       |
| 4  |                                                                     |     |                                                                                                                                                                                                                                                                                                                                                                                                              |       |
| 5  | <b>Methods: Assignment of interventions (for controlled trials)</b> |     |                                                                                                                                                                                                                                                                                                                                                                                                              |       |
| 6  | Allocation:                                                         |     |                                                                                                                                                                                                                                                                                                                                                                                                              |       |
| 7  |                                                                     |     |                                                                                                                                                                                                                                                                                                                                                                                                              |       |
| 8  | Sequence generation                                                 | 16a | Method of generating the allocation sequence (eg, computer-generated random numbers), and list of any factors for stratification. To reduce predictability of a random sequence, details of any planned restriction (eg, blocking) should be provided in a separate document that is unavailable to those who enrol participants or assign interventions                                                     | 8-9   |
| 9  |                                                                     |     |                                                                                                                                                                                                                                                                                                                                                                                                              |       |
| 10 |                                                                     |     |                                                                                                                                                                                                                                                                                                                                                                                                              |       |
| 11 |                                                                     |     |                                                                                                                                                                                                                                                                                                                                                                                                              |       |
| 12 |                                                                     |     |                                                                                                                                                                                                                                                                                                                                                                                                              |       |
| 13 | Allocation concealment mechanism                                    | 16b | Mechanism of implementing the allocation sequence (eg, central telephone; sequentially numbered, opaque, sealed envelopes), describing any steps to conceal the sequence until interventions are assigned                                                                                                                                                                                                    | 8-9   |
| 14 |                                                                     |     |                                                                                                                                                                                                                                                                                                                                                                                                              |       |
| 15 |                                                                     |     |                                                                                                                                                                                                                                                                                                                                                                                                              |       |
| 16 | Implementation                                                      | 16c | Who will generate the allocation sequence, who will enrol participants, and who will assign participants to interventions                                                                                                                                                                                                                                                                                    | 8-9   |
| 17 |                                                                     |     |                                                                                                                                                                                                                                                                                                                                                                                                              |       |
| 18 |                                                                     |     |                                                                                                                                                                                                                                                                                                                                                                                                              |       |
| 19 | Blinding (masking)                                                  | 17a | Who will be blinded after assignment to interventions (eg, trial participants, care providers, outcome assessors, data analysts), and how                                                                                                                                                                                                                                                                    | 9     |
| 20 |                                                                     |     |                                                                                                                                                                                                                                                                                                                                                                                                              |       |
| 21 |                                                                     |     |                                                                                                                                                                                                                                                                                                                                                                                                              |       |
| 22 |                                                                     | 17b | If blinded, circumstances under which unblinding is permissible, and procedure for revealing a participant's allocated intervention during the trial                                                                                                                                                                                                                                                         | NA    |
| 23 |                                                                     |     |                                                                                                                                                                                                                                                                                                                                                                                                              |       |
| 24 |                                                                     |     |                                                                                                                                                                                                                                                                                                                                                                                                              |       |
| 25 | <b>Methods: Data collection, management, and analysis</b>           |     |                                                                                                                                                                                                                                                                                                                                                                                                              |       |
| 26 |                                                                     |     |                                                                                                                                                                                                                                                                                                                                                                                                              |       |
| 27 | Data collection methods                                             | 18a | Plans for assessment and collection of outcome, baseline, and other trial data, including any related processes to promote data quality (eg, duplicate measurements, training of assessors) and a description of study instruments (eg, questionnaires, laboratory tests) along with their reliability and validity, if known. Reference to where data collection forms can be found, if not in the protocol | 9-12  |
| 28 |                                                                     |     |                                                                                                                                                                                                                                                                                                                                                                                                              |       |
| 29 |                                                                     |     |                                                                                                                                                                                                                                                                                                                                                                                                              |       |
| 30 |                                                                     |     |                                                                                                                                                                                                                                                                                                                                                                                                              |       |
| 31 |                                                                     | 18b | Plans to promote participant retention and complete follow-up, including list of any outcome data to be collected for participants who discontinue or deviate from intervention protocols                                                                                                                                                                                                                    | NA    |
| 32 |                                                                     |     |                                                                                                                                                                                                                                                                                                                                                                                                              |       |
| 33 |                                                                     |     |                                                                                                                                                                                                                                                                                                                                                                                                              |       |
| 34 | Data management                                                     | 19  | Plans for data entry, coding, security, and storage, including any related processes to promote data quality (eg, double data entry; range checks for data values). Reference to where details of data management procedures can be found, if not in the protocol                                                                                                                                            | 17-18 |
| 35 |                                                                     |     |                                                                                                                                                                                                                                                                                                                                                                                                              |       |
| 36 |                                                                     |     |                                                                                                                                                                                                                                                                                                                                                                                                              |       |
| 37 |                                                                     |     |                                                                                                                                                                                                                                                                                                                                                                                                              |       |
| 38 | Statistical methods                                                 | 20a | Statistical methods for analysing primary and secondary outcomes. Reference to where other details of the statistical analysis plan can be found, if not in the protocol                                                                                                                                                                                                                                     | 16    |
| 39 |                                                                     |     |                                                                                                                                                                                                                                                                                                                                                                                                              |       |
| 40 |                                                                     | 20b | Methods for any additional analyses (eg, subgroup and adjusted analyses)                                                                                                                                                                                                                                                                                                                                     | NA    |
| 41 |                                                                     |     |                                                                                                                                                                                                                                                                                                                                                                                                              |       |
| 42 |                                                                     |     |                                                                                                                                                                                                                                                                                                                                                                                                              |       |
| 43 |                                                                     |     |                                                                                                                                                                                                                                                                                                                                                                                                              |       |
| 44 |                                                                     |     |                                                                                                                                                                                                                                                                                                                                                                                                              |       |
| 45 |                                                                     |     |                                                                                                                                                                                                                                                                                                                                                                                                              |       |
| 46 |                                                                     |     |                                                                                                                                                                                                                                                                                                                                                                                                              |       |
| 47 |                                                                     |     |                                                                                                                                                                                                                                                                                                                                                                                                              |       |

|    |                                 |     |                                                                                                                                                                                                                                                                                                                                       |          |
|----|---------------------------------|-----|---------------------------------------------------------------------------------------------------------------------------------------------------------------------------------------------------------------------------------------------------------------------------------------------------------------------------------------|----------|
| 1  |                                 |     |                                                                                                                                                                                                                                                                                                                                       |          |
| 2  |                                 | 20c | Definition of analysis population relating to protocol non-adherence (eg, as randomised analysis), and any statistical methods to handle missing data (eg, multiple imputation)                                                                                                                                                       | NA       |
| 3  |                                 |     |                                                                                                                                                                                                                                                                                                                                       |          |
| 4  |                                 |     |                                                                                                                                                                                                                                                                                                                                       |          |
| 5  |                                 |     |                                                                                                                                                                                                                                                                                                                                       |          |
| 6  | <b>Methods: Monitoring</b>      |     |                                                                                                                                                                                                                                                                                                                                       |          |
| 7  | Data monitoring                 | 21a | Composition of data monitoring committee (DMC); summary of its role and reporting structure; statement of whether it is independent from the sponsor and competing interests; and reference to where further details about its charter can be found, if not in the protocol. Alternatively, an explanation of why a DMC is not needed | 17       |
| 8  |                                 |     |                                                                                                                                                                                                                                                                                                                                       |          |
| 9  |                                 |     |                                                                                                                                                                                                                                                                                                                                       |          |
| 10 |                                 |     |                                                                                                                                                                                                                                                                                                                                       |          |
| 11 |                                 |     |                                                                                                                                                                                                                                                                                                                                       |          |
| 12 |                                 | 21b | Description of any interim analyses and stopping guidelines, including who will have access to these interim results and make the final decision to terminate the trial                                                                                                                                                               | 17       |
| 13 |                                 |     |                                                                                                                                                                                                                                                                                                                                       |          |
| 14 |                                 |     |                                                                                                                                                                                                                                                                                                                                       |          |
| 15 | Harms                           | 22  | Plans for collecting, assessing, reporting, and managing solicited and spontaneously reported adverse events and other unintended effects of trial interventions or trial conduct                                                                                                                                                     | 17       |
| 16 |                                 |     |                                                                                                                                                                                                                                                                                                                                       |          |
| 17 | Auditing                        | 23  | Frequency and procedures for auditing trial conduct, if any, and whether the process will be independent from investigators and the sponsor                                                                                                                                                                                           | NA       |
| 18 |                                 |     |                                                                                                                                                                                                                                                                                                                                       |          |
| 19 |                                 |     |                                                                                                                                                                                                                                                                                                                                       |          |
| 20 |                                 |     |                                                                                                                                                                                                                                                                                                                                       |          |
| 21 | <b>Ethics and dissemination</b> |     |                                                                                                                                                                                                                                                                                                                                       |          |
| 22 | Research ethics approval        | 24  | Plans for seeking research ethics committee/institutional review board (REC/IRB) approval                                                                                                                                                                                                                                             | 19       |
| 23 |                                 |     |                                                                                                                                                                                                                                                                                                                                       |          |
| 24 |                                 |     |                                                                                                                                                                                                                                                                                                                                       |          |
| 25 | Protocol amendments             | 25  | Plans for communicating important protocol modifications (eg, changes to eligibility criteria, outcomes, analyses) to relevant parties (eg, investigators, REC/IRBs, trial participants, trial registries, journals, regulators)                                                                                                      | NA       |
| 26 |                                 |     |                                                                                                                                                                                                                                                                                                                                       |          |
| 27 |                                 |     |                                                                                                                                                                                                                                                                                                                                       |          |
| 28 |                                 |     |                                                                                                                                                                                                                                                                                                                                       |          |
| 29 | Consent or assent               | 26a | Who will obtain informed consent or assent from potential trial participants or authorised surrogates, and how (see Item 32)                                                                                                                                                                                                          | 6, 14-16 |
| 30 |                                 |     |                                                                                                                                                                                                                                                                                                                                       |          |
| 31 |                                 | 26b | Additional consent provisions for collection and use of participant data and biological specimens in ancillary studies, if applicable                                                                                                                                                                                                 | NA       |
| 32 |                                 |     |                                                                                                                                                                                                                                                                                                                                       |          |
| 33 |                                 |     |                                                                                                                                                                                                                                                                                                                                       |          |
| 34 | Confidentiality                 | 27  | How personal information about potential and enrolled participants will be collected, shared, and maintained in order to protect confidentiality before, during, and after the trial                                                                                                                                                  | 17-18    |
| 35 |                                 |     |                                                                                                                                                                                                                                                                                                                                       |          |
| 36 |                                 |     |                                                                                                                                                                                                                                                                                                                                       |          |
| 37 | Declaration of interests        | 28  | Financial and other competing interests for principal investigators for the overall trial and each study site                                                                                                                                                                                                                         | 21       |
| 38 |                                 |     |                                                                                                                                                                                                                                                                                                                                       |          |
| 39 | Access to data                  | 29  | Statement of who will have access to the final trial dataset, and disclosure of contractual agreements that limit such access for investigators                                                                                                                                                                                       | 21-22    |
| 40 |                                 |     |                                                                                                                                                                                                                                                                                                                                       |          |
| 41 |                                 |     |                                                                                                                                                                                                                                                                                                                                       |          |
| 42 |                                 |     |                                                                                                                                                                                                                                                                                                                                       |          |
| 43 |                                 |     |                                                                                                                                                                                                                                                                                                                                       |          |
| 44 |                                 |     |                                                                                                                                                                                                                                                                                                                                       |          |
| 45 |                                 |     |                                                                                                                                                                                                                                                                                                                                       |          |
| 46 |                                 |     |                                                                                                                                                                                                                                                                                                                                       |          |
| 47 |                                 |     |                                                                                                                                                                                                                                                                                                                                       |          |

1  
2  
3  
4  
5  
6  
7  
8  
9  
10  
11  
12  
13  
14  
15  
16  
17  
18  
19  
20  
21  
22  
23  
24  
25  
26  
27  
28  
29  
30  
31  
32  
33  
34  
35  
36  
37  
38  
39  
40  
41  
42  
43  
44  
45  
46  
47

|                               |     |                                                                                                                                                                                                                                                                                     |    |
|-------------------------------|-----|-------------------------------------------------------------------------------------------------------------------------------------------------------------------------------------------------------------------------------------------------------------------------------------|----|
| Ancillary and post-trial care | 30  | Provisions, if any, for ancillary and post-trial care, and for compensation to those who suffer harm from trial participation                                                                                                                                                       | NA |
| Dissemination policy          | 31a | Plans for investigators and sponsor to communicate trial results to participants, healthcare professionals, the public, and other relevant groups (eg, via publication, reporting in results databases, or other data sharing arrangements), including any publication restrictions | 19 |
|                               | 31b | Authorship eligibility guidelines and any intended use of professional writers                                                                                                                                                                                                      | 22 |
|                               | 31c | Plans, if any, for granting public access to the full protocol, participant-level dataset, and statistical code                                                                                                                                                                     | 21 |
| <b>Appendices</b>             |     |                                                                                                                                                                                                                                                                                     |    |
| Informed consent materials    | 32  | Model consent form and other related documentation given to participants and authorised surrogates                                                                                                                                                                                  | 21 |
| Biological specimens          | 33  | Plans for collection, laboratory evaluation, and storage of biological specimens for genetic or molecular analysis in the current trial and for future use in ancillary studies, if applicable                                                                                      | NA |

---

\*It is strongly recommended that this checklist be read in conjunction with the SPIRIT 2013 Explanation & Elaboration for important clarification on the items. Amendments to the protocol should be tracked and dated. The SPIRIT checklist is copyrighted by the SPIRIT Group under the Creative Commons "[Attribution-NonCommercial-NoDerivs 3.0 Unported](https://creativecommons.org/licenses/by-nc-nd/3.0/)" license.

# BMJ Open

## Multicomponent non-pharmacological intervention to prevent delirium for hospitalised people with advanced cancer: study protocol for a phase II cluster randomised controlled trial

|                               |                                                                                                                                                                                                                                                                                                                                                                                                                                                                                                                                                                                                                                                                                                                                                                                                                                                                                                                                                                                                                                                                                                                                                                                                                                                                                                                                                                                                                                                                                                                                                                                                                                                                                                                                                                                                                                                                                                                                                                                                                                                                                                                                                                                                                           |
|-------------------------------|---------------------------------------------------------------------------------------------------------------------------------------------------------------------------------------------------------------------------------------------------------------------------------------------------------------------------------------------------------------------------------------------------------------------------------------------------------------------------------------------------------------------------------------------------------------------------------------------------------------------------------------------------------------------------------------------------------------------------------------------------------------------------------------------------------------------------------------------------------------------------------------------------------------------------------------------------------------------------------------------------------------------------------------------------------------------------------------------------------------------------------------------------------------------------------------------------------------------------------------------------------------------------------------------------------------------------------------------------------------------------------------------------------------------------------------------------------------------------------------------------------------------------------------------------------------------------------------------------------------------------------------------------------------------------------------------------------------------------------------------------------------------------------------------------------------------------------------------------------------------------------------------------------------------------------------------------------------------------------------------------------------------------------------------------------------------------------------------------------------------------------------------------------------------------------------------------------------------------|
| Journal:                      | <i>BMJ Open</i>                                                                                                                                                                                                                                                                                                                                                                                                                                                                                                                                                                                                                                                                                                                                                                                                                                                                                                                                                                                                                                                                                                                                                                                                                                                                                                                                                                                                                                                                                                                                                                                                                                                                                                                                                                                                                                                                                                                                                                                                                                                                                                                                                                                                           |
| Manuscript ID                 | bmjopen-2018-026177.R1                                                                                                                                                                                                                                                                                                                                                                                                                                                                                                                                                                                                                                                                                                                                                                                                                                                                                                                                                                                                                                                                                                                                                                                                                                                                                                                                                                                                                                                                                                                                                                                                                                                                                                                                                                                                                                                                                                                                                                                                                                                                                                                                                                                                    |
| Article Type:                 | Protocol                                                                                                                                                                                                                                                                                                                                                                                                                                                                                                                                                                                                                                                                                                                                                                                                                                                                                                                                                                                                                                                                                                                                                                                                                                                                                                                                                                                                                                                                                                                                                                                                                                                                                                                                                                                                                                                                                                                                                                                                                                                                                                                                                                                                                  |
| Date Submitted by the Author: | 08-Oct-2018                                                                                                                                                                                                                                                                                                                                                                                                                                                                                                                                                                                                                                                                                                                                                                                                                                                                                                                                                                                                                                                                                                                                                                                                                                                                                                                                                                                                                                                                                                                                                                                                                                                                                                                                                                                                                                                                                                                                                                                                                                                                                                                                                                                                               |
| Complete List of Authors:     | <p>Hosie, Annmarie; University of Technology Sydney, IMPACCT - Improving Palliative, Aged and Chronic Care through Clinical Research and Translation</p> <p>Phillips, Jane; University of Technology Sydney, IMPACCT - Improving Palliative, Aged and Chronic Care through Clinical Research and Translation</p> <p>Lam, Lawrence; University of Technology Sydney, IMPACCT - Improving Palliative, Aged and Chronic Care through Clinical Research and Translation</p> <p>Kochovska, Slavica; University of Technology Sydney Faculty of Health, IMPACCT - Improving Palliative, Aged and Chronic Care through Clinical Research and Translation</p> <p>Noble, Beverly; University of Technology Sydney, IMPACCT - Improving Palliative, Aged and Chronic Care through Clinical Research and Translation</p> <p>Brassil, Meg; University of Technology Sydney, IMPACCT - Improving Palliative, Aged and Chronic Care through Clinical Research and Translation</p> <p>Kurrle, Susan; Hornsby Ku-ring-gai Health Service, University of Sydney, Northern Clinical School</p> <p>Cumming, Anne; Australian Commission on Safety and Quality in Healthcare</p> <p>Caplan, Gideon; Prince of Wales Hospital, Geriatric Medicine; University of New South Wales</p> <p>Chye, Richard; St. Vincent's Hospital, Sacred Heart Health Service</p> <p>Le, Brian; Royal Melbourne Hospital, Palliative and Supportive Services</p> <p>Ely, E. Wesley; Vanderbilt University Medical Center, Center for Critical Illness, Brain dysfunction &amp; Survivorship (CIBS)</p> <p>Lawlor, Peter; University of Ottawa, Department of Medicine</p> <p>Bush, Shirley H.; University of Ottawa, Department of Medicine</p> <p>Davis, Jan Maree; Calvary Health Care Kogarah, Palliative Care</p> <p>Lovell, Melanie; Hornsby Ku-ring-gai Health Service, University of Sydney, Northern Clinical School; Greenwich Hospital, HammondCare</p> <p>Brown, Linda; University of Technology Sydney, IMPACCT - Improving Palliative, Aged and Chronic Care through Clinical Research and Translation</p> <p>Fazekas, Belinda; University of Technology Sydney, IMPACCT - Improving Palliative, Aged and Chronic Care through Clinical Research</p> |



|                                    |                                                                                                                                                                                                                                                                                                                                                                                                                                                        |
|------------------------------------|--------------------------------------------------------------------------------------------------------------------------------------------------------------------------------------------------------------------------------------------------------------------------------------------------------------------------------------------------------------------------------------------------------------------------------------------------------|
|                                    | and Translation<br>Cheah, Seong; University of Technology Sydney Faculty of Health,<br>Centre for Midwifery, Child and Family Health<br>Edwards, Layla; University of Technology Sydney, IMPACCT - Improving<br>Palliative, Aged and Chronic Care through Clinical Research and<br>Translation<br>Agar, Meera ; University of Technology Sydney, IMPACCT - Improving<br>Palliative, Aged and Chronic Care through Clinical Research and<br>Translation |
| <b>Primary Subject<br>Heading</b>: | Palliative care                                                                                                                                                                                                                                                                                                                                                                                                                                        |
| Secondary Subject Heading:         | Oncology                                                                                                                                                                                                                                                                                                                                                                                                                                               |
| Keywords:                          | delirium, neoplasms, prevention, non-pharmacological, clinical trial,<br>PALLIATIVE CARE                                                                                                                                                                                                                                                                                                                                                               |
|                                    |                                                                                                                                                                                                                                                                                                                                                                                                                                                        |

SCHOLARONE™  
Manuscripts

## The PRESERVE pilot study

## Title: Multicomponent non-pharmacological intervention to prevent delirium for hospitalised people with advanced cancer: study protocol for a phase II cluster randomised controlled trial

---

**Author**Annamarie Hosie<sup>1</sup>Jane Phillips<sup>1</sup>,Lawrence Lam<sup>1</sup>Slavica Kochovska<sup>1</sup>,Beverly Noble<sup>1</sup>Meg Brassil<sup>1</sup>Susan Kurrle<sup>2</sup>Anne Cumming<sup>3</sup>Gideon A Caplan<sup>4,5</sup>Richard Chye<sup>6</sup>Brian Le<sup>7</sup>E. Wesley Ely<sup>8</sup>Peter G. Lawlor<sup>9</sup>Shirley H. Bush<sup>9</sup>Jan Maree Davis<sup>10</sup>Melanie Lovell<sup>1,2,11</sup>Linda Brown<sup>1</sup>Belinda Fazekas<sup>1</sup>Seong Leang Cheah<sup>1</sup>Layla Edwards<sup>1</sup>Meera Agar<sup>1</sup>**Email**

annmarie.hosie@uts.edu.au

jane.phillips@uts.edu.au

lawrence.lam@uts.edu.au

slavica.kochovska@uts.edu.au

bev.noble@bigpond.com

meg.brassil@bigpond.com.au

susan.kurrle@sydney.edu.au

anne.cumming@safetyandquality.gov.au

gideon.caplan@health.nsw.gov.au

richard.chye@svha.org.au

brian.le@mh.org.au

wes.ely@vumc.org

plawlor@bruyere.org

sbush@bruyere.org

janmaree.davis@health.nsw.gov.au

mlovell@hammond.com.au

linda.brown@uts.edu.au

belinda.fazekas@uts.edu.au

seong.cheah@uts.edu.au

layla.edwards@uts.edu.au

meera.agar@uts.edu.au

**Institutions**

1. University of Technology Sydney, IMPACCT, Bld. 10, Level 3, 235-253 Jones St, Ultimo, Australia
2. University of Sydney, Northern Clinical School, Hornsby Ku-ring-gai Health Service, Hornsby, NSW 2077, Australia
3. Australian Commission on Safety and Quality in Health Care, Level 5, 255 Elizabeth St, Sydney, Australia
4. Prince of Wales Hospital, Geriatric Medicine, High Street, Randwick, NSW, 2035, Australia
5. University of New South Wales, Randwick, NSW, 2035, Australia
6. St Vincent's Hospital, Sacred Heart Health Service, Darlinghurst Road, Darlinghurst, NSW 2010, Australia
7. Royal Melbourne Hospital, Palliative and Supportive Services, 1 South West Grattan Street, Parkville, VIC 3050, Australia
8. Center for Critical Illness, Brain dysfunction & Survivorship (CIBS), 2525 West End Ave, Suite 450, Nashville, TN 37203-8300, USA
9. University of Ottawa, Department of Medicine, 43 Bruyère Street, Ottawa K1N 5C8, Canada
10. Calvary Health Care Kogarah Palliative Care, Rocky Point Road Kogarah NSW 2217, Australia
11. Greenwich Hospital, HammondCare, 97-115 River Rd, Greenwich, NSW 2065, Australia

**Corresponding Author**

Dr Annmarie Hosie

Phone: +61 2 9514 4404

Email: [annmarie.hosie@uts.edu.au](mailto:annmarie.hosie@uts.edu.au)**Document details**

Number of tables: 1

Number of figures: 2

Number of references: 45

Word count: 3988

The PRESERVE pilot study

## Abstract

### Introduction

Delirium is a significant medical complication for hospitalised patients. Up to one-third of delirium episodes are preventable in older inpatients through non-pharmacological strategies that support essential human needs, such as physical and cognitive activity, sleep, hydration, vision and hearing. We hypothesized that a multicomponent intervention similarly may decrease delirium incidence, and/or its duration and severity, in inpatients with advanced cancer. Prior to a phase III trial, we aimed to determine if a multicomponent non-pharmacological delirium prevention intervention is feasible and acceptable for this specific inpatient group.

### Methods and analysis

The study is a phase II cluster randomised wait-listed controlled trial involving inpatients with advanced cancer at four Australian palliative care inpatient units. Intervention sites will introduce delirium screening, diagnostic assessment and a multicomponent delirium prevention intervention with six domains of care: preserving natural sleep; maintaining optimal vision and hearing; optimising hydration; promoting communication, orientation and cognition; optimising mobility; and promoting family partnership. Interdisciplinary teams will tailor intervention delivery to each site, and to patient need. Control sites will first introduce only delirium screening and diagnosis, later implementing the intervention, modified according to initial results. The primary outcome is adherence to the intervention during the first seven days of admission, as measured for 40 consecutively admitted eligible patients. Secondary outcomes relate to fidelity and feasibility, acceptability and sustainability of the study intervention, processes and measures in this patient population, using quantitative and qualitative measures. Delirium incidence and severity will be measured to inform power calculations for a future phase III trial.

The PRESERVE pilot study

### **Ethics and dissemination**

Ethical approval was obtained for all four sites. Trial results, qualitative sub-study findings, and implementation of the intervention will be submitted for publication in peer-reviewed journals, and reported at conferences, to study sites and key peak bodies.

### **Trial registration**

ACTRN12617001070325p

### **Key words**

Delirium, cancer, neoplasms, inpatients, palliative care, clinical trial, feasibility studies

### **Strengths and limitations of this study**

- Strengths are the cluster RCT design; inclusion of patient and family perspectives; and sponsorship by the Palliative Care Clinical Trials Collaborative (PaCCSC), a national, multi-site clinical trials group which provides rigorous research governance.
- A limitation is that site and research staff will not be blinded to the intervention.
- The study is being conducted in Australian palliative care inpatient settings and will include only patients with advanced cancer, which will limit the generalisability of results for other settings and people with other advanced illnesses.

The PRESERVE pilot study

## Introduction

Delirium is a serious acute neurocognitive disorder and medical complication for people with advanced cancer receiving palliative care in hospital, where it occurs for up to one in two patients and is reversible in only up to half of cases, at best.<sup>1-3</sup> It causes sudden disruption to attention and cognition, such as memory and language deficit, disorientation, and perception.<sup>1</sup> During delirium, feelings of fear, humiliation, confusion and isolation are common,<sup>4</sup> at a time when connection with family, friends and health professionals is important and highly valued.<sup>5</sup> Family experience high levels of distress as a result.<sup>5</sup> Delirium is further associated with increased falls, pressure areas, longer-term cognitive and functional decline, duration of hospital stay, mortality, and health care costs.<sup>6-8</sup>

Despite the incidence of delirium and its profound impacts on people with advanced illness, there are limited treatment options and, to date, no effective pharmacological intervention.<sup>9-11</sup> Nor have evidence-based processes for delirium prevention, recognition or assessment been translated in palliative care units.<sup>12,13</sup> The most effective strategy for delirium in older patients across a range of hospital settings is prevention through non-pharmacological strategies to meet essential needs, such as physical and cognitive activity, sleep, hydration, vision and hearing. When implemented as a 'multicomponent intervention', these strategies have reduced delirium incidence by one-third.<sup>9,14</sup> A meta-analysis (n=4,267) of randomised or matched trials of non-pharmacological prevention strategies reported significant reduction in delirium incidence, with the odds of delirium 53% lower in the intervention group compared with controls (odds ratio (OR) 0.47, 95% confidence interval (CI) 0.38-0.58, p<0.001).<sup>14</sup> A Cochrane Review of 39 randomised controlled trials (n=16,082) of non-pharmacological, medication or anaesthetic interventions reported that seven non-pharmacological intervention studies (n=1,950) reduced delirium incidence (relative risk (RR) 0.69, 95% CI 0.59 to 0.81), while evidence for most medication and anaesthetic

## The PRESERVE pilot study

1  
2  
3 interventions was uncertain.<sup>9</sup> There was moderate quality evidence that the non-  
4  
5 pharmacological interventions reduced length of hospital admission and improved the  
6  
7 likelihood of return to independent living, with low quality evidence of decreased delirium  
8  
9 duration and severity.<sup>9</sup> Studies of non-pharmacological interventions for delirium have  
10  
11 mainly focused on older patients, yet often excluded patients with advanced cancer and other  
12  
13 life-threatening illnesses.<sup>15</sup> Also, strategies within the interventions were diverse, some were  
14  
15 better operationalised than others, and not all used a randomised design.<sup>14</sup>  
16  
17

18  
19 The one study testing a non-pharmacological delirium prevention intervention in people with  
20  
21 advanced cancer (n=1,516) in seven Canadian specialist palliative care inpatient units  
22  
23 reported no statistically significant difference in delirium incidence, total days in delirium,  
24  
25 duration of first episode, severity or delirium-free survival.<sup>16</sup> Strategies were fewer and less  
26  
27 targeted to essential needs of patients than those reported in the more recent meta-analysis  
28  
29 and Cochrane review;<sup>9,14</sup> and included: i) orientating patients to time, person and place each  
30  
31 shift; ii) informing family about delirium, its symptoms and prevention of confusion; and iii)  
32  
33 assessing pharmacological risk factors for delirium before querying physicians about  
34  
35 consequent planned medication change. There also was inadequate rate and timeliness of  
36  
37 completion of the primary measure, the Confusion Assessment Method. While adherence to  
38  
39 the intervention was greater than 80%, there was no difference in overall use of psychoactive  
40  
41 medication between the two arms. Given that such medication is associated with  
42  
43 delirium,<sup>17,18</sup> this factor may partly explain the study's negative results.<sup>16</sup>  
44  
45  
46  
47

48  
49 There are possible barriers to implementation of non-pharmacological delirium prevention  
50  
51 strategies for people with advanced cancer. These include their common frailty and fatigue  
52  
53 which reduces capacity to participate in activities such as exercise. Patients and family may  
54  
55 not realise the serious risks associated with an episode of delirium, or prioritise prevention  
56  
57 strategies without this knowledge. Some clinicians may perceive that delirium is inevitable  
58  
59

The PRESERVE pilot study

and innocuous in advanced cancer and palliative care contexts;<sup>19,20</sup> and presume that preventing delirium is not possible, necessary or likely to be effective. Clinicians historically have relied on pharmacological intervention for delirium, rather than intentionally striving to prevent delirium through non-pharmacological means. With competing demands and without evidence of effectiveness, hospital managers may not value the importance of preventing delirium or allocate the required resources or personnel for non-pharmacological strategies, particularly for people approaching the end of their life.

Yet, to fulfil the remit of palliative care to help patients live as actively as possible, the adversity of delirium impels further empirical testing to definitively determine whether it can be prevented during advanced cancer. Based on the body of research conducted with older people in hospital described above,<sup>9,14</sup> we hypothesised that a similar multicomponent intervention would reduce delirium incidence and/or decrease its duration and severity for this inpatient population. Given the above-noted possible barriers to implementation, piloting the intervention and study design was required prior to testing the hypothesis in a phase III (efficacy) trial.

## **Aim and objectives**

To determine if a multicomponent non-pharmacological delirium prevention intervention is feasible and acceptable for inpatients with advanced cancer.

The objectives are to:

1. To develop a multi-component non-pharmacological delirium prevention intervention ('non-pharmacological delirium prevention intervention'), derived from highly efficacious interventions for older adults in hospital, for people with advanced cancer and palliative care inpatient unit settings;

## The PRESERVE pilot study

2. To describe the strategies used by participating sites to implement the delirium measurement tools and non-pharmacological delirium prevention intervention;
3. To determine if a non-pharmacological delirium prevention intervention is feasible, acceptable and deliverable with high adherence and fidelity in oncology and palliative care units;
4. To determine the feasibility and design of a phase III trial to test the efficacy of the non-pharmacological delirium prevention intervention in people with advanced cancer in hospital.

## Methods and analysis

### Design

A phase II, cluster randomised controlled trial (RCT) with a waitlist control.<sup>21</sup> Participating sites will be randomised to the intervention (screening and immediate implementation of intervention) or control (screening and waitlist to the modified-intervention) (Figure 1).

The use of this design in the phase II trial was to inform the feasibility and design, delivery methods and power calculations of a future multi-site phase III cluster RCT. A cluster approach was chosen because the proposed intervention is more suited to implementation at a site level, and a traditional RCT design would risk contamination in the control arm. The use of a cluster RCT design is an advance on prior studies of non-pharmacological prevention interventions that used non-randomised designs. A waitlist control arm was chosen as key stakeholders at interested sites considered that the delirium prevention strategies were important, that participation in a trial that enabled access to the intervention was more appealing and ethically sound, and that the intervention strategies were well established as effective in other hospital settings and the potential benefits were clear, in principle. The waitlist control adds to the resource and time requirements of the trial, but will allow the



1 The PRESERVE pilot study

2 intervention and study processes to be modified and/or refined at the two waitlist control  
3 sites, should initial results indicate that this is required.<sup>21</sup>  
4  
5  
6

### 7 **Sites (clusters) and patient population**

8  
9  
10 The participating sites are four Australian palliative care units, where approximately 75% of  
11 patients have a primary diagnosis of advanced cancer.<sup>22</sup>  
12  
13  
14

15 In line with the cluster RCT design, consent to participate was obtained at the site level from  
16 the person with the delegation to approve participation. Data will be collected for all  
17 admitted patients aged  $\geq 18$  years with a diagnosis of advanced cancer, for which no  
18 individual patient consent will be required.  
19  
20  
21  
22  
23

### 24 **Intervention**

25  
26 Intervention sites will implement i) delirium screening; ii) delirium diagnosis assessments;  
27 and iii) the multicomponent delirium prevention intervention.  
28  
29  
30  
31

32 Bedside nurses will undertake the Nursing Delirium Screening Scale (Nu-DESC)<sup>23</sup> for all  
33 eligible patients at the end of every shift. Within 24 hours of the patient assessed as having a  
34 Nu-DESC score  $\geq 2$ , a trained physician will apply Diagnostic and Statistical Manual of  
35 Mental Disorders, Fifth edition (DSM-5) diagnostic criteria for delirium,<sup>1</sup> operationalised  
36 using the Delirium Rating Scale-Revised-1998 (DRS-R-98).<sup>24</sup> These processes currently are  
37 not routine at the participating sites and therefore will be additional to usual care.  
38  
39  
40  
41  
42  
43  
44  
45

46 The multicomponent delirium prevention intervention involves five domains of care that,  
47 when delivered in combination, significantly reduced delirium incidence in older hospitalised  
48 patients in previous clinical trials.<sup>9,14</sup> We added family partnership as an additional domain,  
49 as it was recommended by our consumer investigators and an expert working group, is highly  
50 valued by patients and family members,<sup>5,25</sup> and identified as essential by the Australian  
51 Commission for Safety and Quality in Healthcare (ACSQHC) in a new Delirium Standard, if  
52  
53  
54  
55  
56  
57  
58  
59  
60

1 The PRESERVE pilot study

2 preferred by the patient.<sup>26</sup> We did not include a pharmacological component (such as  
3  
4 minimising polypharmacy) because there was less evidence that this component of care  
5  
6 effectively prevents delirium, compared to that which addresses fundamental human needs  
7  
8 for physical and cognitive activity, sleep, hydration, vision and hearing. 9, 14  
9  
10

11  
12 The delirium prevention intervention will be delivered to all eligible patients for the first  
13  
14 seven days of admission by members of the interdisciplinary team, family caregivers and  
15  
16 volunteers. The domains and strategies of the multicomponent intervention are presented in  
17  
18 Table 1.  
19  
20

21 Control sites will initially implement only delirium screening and diagnosis. Once the  
22  
23 intervention sites achieve their sample, control sites will implement the intervention.  
24  
25

26 All sites will continue usual care with respect to treatment of patients with delirium.  
27  
28  
29  
30  
31  
32  
33  
34  
35  
36  
37  
38  
39  
40  
41  
42  
43  
44  
45  
46  
47  
48  
49  
50  
51  
52  
53  
54  
55  
56  
57  
58  
59  
60

## The PRESERVE pilot study

**Table 1: Multicomponent delirium prevention intervention**

| Domain                                           | Strategies                                                                                                                                                                                                                                                                                                                                                                                                                                                                                                                                                                                                              | Implementation                                                                                                                                                                                                                                                                                                                                                                                                                                                                                                        |
|--------------------------------------------------|-------------------------------------------------------------------------------------------------------------------------------------------------------------------------------------------------------------------------------------------------------------------------------------------------------------------------------------------------------------------------------------------------------------------------------------------------------------------------------------------------------------------------------------------------------------------------------------------------------------------------|-----------------------------------------------------------------------------------------------------------------------------------------------------------------------------------------------------------------------------------------------------------------------------------------------------------------------------------------------------------------------------------------------------------------------------------------------------------------------------------------------------------------------|
| Preserve natural sleep                           | <ul style="list-style-type: none"> <li>• Offer ear plugs to patients who have low risk of falls</li> <li>• Offer eye shades to patients who have low risk of falls</li> <li>• Reduce noise outside patient rooms during 21:00-06:00</li> <li>• Normal day-night light variation in room and unit</li> <li>• Exposure to natural light during daylight hours</li> <li>• Schedule care activities to allow uninterrupted sleep during the night</li> <li>• Avoid caffeine after 4pm</li> </ul>                                                                                                                            | <ul style="list-style-type: none"> <li>• The patient wears ear plugs at night</li> <li>• The patient wear eye shades at night</li> <li>• Room curtains/blinds are open during the day</li> <li>• Room lights are off or minimised at night</li> <li>• The patient spends time outside during the day</li> <li>• The patient drinks no caffeinated drinks after 4pm</li> <li>• The patient reports uninterrupted night-time sleep</li> </ul>                                                                           |
| Maintain optimal sensory perception              | <ul style="list-style-type: none"> <li>• Assess hearing</li> <li>• Assist with and re-inforce use of hearing aids and special communication techniques</li> <li>• Ear wax clearing as needed</li> <li>• Assess need for visual aids (glasses, magnifying lenses)</li> <li>• If needed, ask family to provide for the patient;</li> <li>• Assist with and reinforce use of visual aids</li> </ul>                                                                                                                                                                                                                        | <ul style="list-style-type: none"> <li>• The patient has their hearing assessed</li> <li>• The patient has ear wax cleaning</li> <li>• The patient wears functioning hearing aids</li> <li>• The patient has their vision assessed</li> <li>• The patient wears their glasses appropriately</li> <li>• The patient uses visual aids</li> </ul>                                                                                                                                                                        |
| Optimise hydration                               | <ul style="list-style-type: none"> <li>• Encourage oral fluids</li> <li>• Physical assistance with drinks and meals, as required</li> <li>• Drinking aids, as required</li> <li>• Be alert and respond to reversible causes of poor oral intake within 24 hours e.g. nausea, vomiting, drowsiness, sore mouth</li> </ul>                                                                                                                                                                                                                                                                                                | <ul style="list-style-type: none"> <li>• The patient is encouraged to drink</li> <li>• The patient is assisted with meals</li> <li>• Drinking aids are provided e.g. straws</li> <li>• Intervention for reversible causes of poor oral intake are in place</li> </ul>                                                                                                                                                                                                                                                 |
| Promote communication, orientation and cognition | <ul style="list-style-type: none"> <li>• Interpreter and translation for people with NESB</li> <li>• Greet the patient by name</li> <li>• Introduce self by name and role</li> <li>• Refer to person, time and place when talking with the patient</li> <li>• Time aids in room e.g. watch, personal or wall clock; wall, desk or electronic calendar</li> <li>• Update in-room whiteboards daily with date, day, place, reason for admission, team member names, schedule</li> <li>• Minimise number of transfers to other beds or rooms within the unit</li> <li>• Discuss current events with the patient</li> </ul> | <ul style="list-style-type: none"> <li>• Interpreter is available and used</li> <li>• Orientating information is translated into the patient's native language</li> <li>• The patient can see the time, day, date and month in their room</li> <li>• The patient remains in the same bed location within the unit</li> <li>• The patient discusses current events</li> <li>• The patient reminisces and/or talks about their life and family</li> <li>• The patient spends time in cognitively stimulating</li> </ul> |

## The PRESERVE pilot study

|                    |                                                                                                                                                                                                                                                                                                                                                                                                                                                                                                                                                                                                                                                                                                                                                                                                                                                                                                                                                                  |                                                                                                                                                                                                                                                                                                                                                                |
|--------------------|------------------------------------------------------------------------------------------------------------------------------------------------------------------------------------------------------------------------------------------------------------------------------------------------------------------------------------------------------------------------------------------------------------------------------------------------------------------------------------------------------------------------------------------------------------------------------------------------------------------------------------------------------------------------------------------------------------------------------------------------------------------------------------------------------------------------------------------------------------------------------------------------------------------------------------------------------------------|----------------------------------------------------------------------------------------------------------------------------------------------------------------------------------------------------------------------------------------------------------------------------------------------------------------------------------------------------------------|
|                    | <ul style="list-style-type: none"> <li>• Encourage the patient to reminisce and talk</li> <li>• Encourage the patient to engage in cognitively stimulating activities</li> </ul>                                                                                                                                                                                                                                                                                                                                                                                                                                                                                                                                                                                                                                                                                                                                                                                 | <p>activities e.g. reading, puzzles, games, knitting, music</p> <ul style="list-style-type: none"> <li>• Cognitive stimulating activities are in the patient's care plan</li> </ul>                                                                                                                                                                            |
| Optimise mobility  | <ul style="list-style-type: none"> <li>• Minimise use of tethers e.g. intravenous line, indwelling catheter, drain, oxygen</li> <li>• Minimise use of physical restraints e.g. bed rails, lock-in chair tables, vest restraints, limb restraints</li> <li>• Encourage and/or assist the patient to undertake physical activity throughout the day according to their capacity             <ul style="list-style-type: none"> <li>○ Level 0: No activity planned (state reason),</li> <li>○ Level 1: Active range of movement exercises in bed and/or sitting position in bed e.g. regular bed adjustment, assistance with re-positioning</li> <li>○ Level 2: Assistance to sit on the side of the bed</li> <li>○ Level 3: Sitting out of bed in a chair, standing</li> <li>○ Level 4: Walking (marching in place, independent or assisted walking around room and unit)</li> <li>○ Level 5: Attend inpatient gym, walking outside of unit</li> </ul> </li> </ul> | <ul style="list-style-type: none"> <li>• The patient is free of tethers</li> <li>• The patient is free of physical restraint</li> <li>• The patient moves and/or exercises to their optimal capacity</li> </ul>                                                                                                                                                |
| Family partnership | <ul style="list-style-type: none"> <li>• Ask family about the patient's baseline cognition</li> <li>• Inform the patient and family about delirium risk</li> <li>• Inform the patient and family about delirium prevention strategies and invite participation</li> </ul>                                                                                                                                                                                                                                                                                                                                                                                                                                                                                                                                                                                                                                                                                        | <ul style="list-style-type: none"> <li>• Family are asked about the patient's baseline cognition on admission</li> <li>• Delirium information brochure is provided to the patient and family</li> <li>• Verbally inform of delirium risk and prevention</li> <li>• Patients and family are invited to participate in delirium prevention strategies</li> </ul> |

1 The PRESERVE pilot study

2  
3 **Site engagement, education and training**

4  
5  
6 The phase II trial will not pre-determine delivery methods for the intervention, instead  
7  
8 observing the methods of each site in order to learn from the site teams about their  
9  
10 established practice, as well as what practices they needed to establish. Engagement of site  
11  
12 staff and volunteers will be guided by Michie's Behaviour Change Wheel (BCW), an  
13  
14 evidenced-based framework for changing health-related behaviours.<sup>27</sup> Each site will form an  
15  
16 interdisciplinary working group of medical, nursing, allied health, pastoral care, volunteer  
17  
18 coordinator and managerial staff. The function of the working groups will be to determine  
19  
20 how to deliver the intervention with the available resources, composition and capabilities of  
21  
22 their site team.<sup>27</sup> Working group members will communicate the study to the whole team,  
23  
24 promote the delirium screening, diagnosis and prevention strategies, and inform patients and  
25  
26 family about delirium and the prevention strategies. Site teams will be encouraged to tailor  
27  
28 the intervention strategies to each patient's assessed needs and preferences to ensure person-  
29  
30 centred care, as well as to adopt simple and feasible methods of delivery and documentation  
31  
32 of the intervention.  
33  
34  
35

36  
37 Education and training of site staff and volunteers in the delirium screening and prevention  
38  
39 strategies will be standardised, interdisciplinary and based on Biggs' educational model.<sup>28,29</sup>  
40  
41 This model will align educational objectives and methods with the delirium learning needs of  
42  
43 staff, and promote critical reflection on attitudes, practice and functional knowledge of the  
44  
45 complexities of caring for a person with advanced cancer in hospital.<sup>28,29</sup> Education and  
46  
47 training will take place for two-months prior to data collection. A brief, simple study  
48  
49 overview manual also will be developed.  
50  
51

52  
53 Study investigators and/or project staff will attend sites to: i) promote fidelity to the study  
54  
55 processes and aims; ii) assist with education and training activities; iii) resolve issues that  
56  
57 delay implementation of the intervention or threaten its integrity; iv) act as a 'delirium  
58  
59

1 The PRESERVE pilot study

2 resource person'; and v) support and encourage site staff and volunteer participation in the  
3 intervention.  
4  
5

6  
7  
8 The frequency, duration and mode of administration of education and training will be  
9  
10 determined prior to implementing delirium screening, diagnosis and prevention strategies in  
11 collaboration with participating sites, then standardised for each. Based on the learnings  
12 obtained in this phase II trial, we will develop a replicable standardised education resource  
13 for the phase III trial.  
14  
15  
16  
17

### 18 **Randomisation**

19  
20 Randomisation of sites will take place after Human Research Ethics Committee (HREC) and  
21 local governance approvals are obtained. In keeping with the method of the anticipated phase  
22 III trial, we will use a permuted block randomisation method with various block sizes to  
23 allocate sites to the intervention or waitlist control. Randomisation will be performed by the  
24 study statistician (LL) from the coordinating centre, the University of Technology Sydney  
25 (UTS).  
26  
27  
28  
29  
30  
31  
32  
33  
34  
35

### 36 **Blinding and avoidance of contamination**

37  
38 The study design and nature of the intervention means that blinding of site staff will not be  
39 possible. Written information for patients and family caregivers will provide only general  
40 information about the study aims, rather than specifics of the design or site allocation.  
41  
42  
43

44 Attention will be focused on research nurse training and standardisation of data collection to  
45 limit the potential for bias.  
46  
47  
48  
49

50 To avoid contamination between sites, personnel collecting data at an intervention site will  
51 not collect data in a control site, and vice versa. Site investigators, research nurses and  
52 project staff will be asked not to discuss the intervention in joint tele-meetings with control  
53 sites. Clinicians at control sites initially will receive information and training on delirium  
54  
55  
56  
57  
58  
59

The PRESERVE pilot study

screening and diagnosis only, and only general information about the prevention intervention in discussions and promotion, until they move into the intervention phase.

### **Data collection**

Research nurses will collect baseline data from sites' most recent Palliative Care Outcomes Collaborative (PCOC) report (a national program which measures and benchmarks patient outcomes in palliative care using standardised clinical assessment tools)<sup>23</sup> (Figure 2) and from key personnel. Research nurses will screen consecutively admitted patients for eligibility, collect delirium screening and diagnostic assessment measures for enrolled patients and record these in a Case Report Form (CRF). At intervention sites, specially designed checklists will capture family caregivers, staff and volunteers' delivery (or otherwise) of delirium prevention strategies within each domain of the multicomponent intervention (Table 1), as well as who delivered it. From this, we will determine the level of involvement of family caregivers, interdisciplinary staff, and volunteers for each strategy. Whenever the patient does not receive the strategy, the reason will be recorded according to the following categories:

- Not required
- Patient choice
- Not clinically appropriate
- Not possible with current resources
- Other

At study completion, the project team will collect PCOC data for the study time-frame (Age, Gender, Country of birth, Preferred language, Aboriginal or Torres Strait Islander status, Primary diagnosis, Length of stay, Performance status [Australian-modified Karnofsky Performance Status (AKPS)]<sup>30</sup> and Resource Utilisation Groups - Activities of Daily Living

1 The PRESERVE pilot study

2  
3 (RUG-ADL)],<sup>31</sup> Palliative care phase).<sup>32</sup> For the sustainability outcome, site research nurses  
4  
5 will collect intervention adherence data at six months for all inpatients for one week.  
6

7  
8 **Assessments**  
9

10 Figure 2 gives the schedule of study measures and time points; Text Box 1 provides  
11  
12 information on the palliative care and delirium measures.  
13  
14  
15  
16  
17  
18  
19  
20  
21  
22  
23  
24  
25  
26  
27  
28  
29  
30  
31  
32  
33  
34  
35  
36  
37  
38  
39  
40  
41  
42  
43  
44  
45  
46  
47  
48  
49  
50  
51  
52  
53  
54  
55  
56  
57  
58  
59  
60



## The PRESERVE pilot study

**Text Box 1: Description of study measures**

The **Australian-modified Karnofsky Performance Status (AKPS)** was adapted from the Karnofsky Performance Status with good face validity and longitudinal test-retest reliability.<sup>30</sup> The AKPS measures patients' overall performance status, using 10-point increments along a scale of 100-10. A score of 100 denotes normal function with no evidence of disease, decreasing to a minimum score of 10, assigned when patients are comatose or barely rousable. Routinely applied on an at least daily basis in most Australian inpatient unit palliative care services. The AKPS will be used to report the patient cohort's performance status at participating sites.

The **Resource Utilisation Groups - Activities of Daily Living (RUG-ADL)**<sup>31</sup> is a validated functional assessment tool which assigns a score of 4-18, based on what a patient does in relation to bed mobility, transfers, eating and toileting, rather than they can do. Higher scores indicate the need for more assistance to undertake activities and that more resources are required to provide this assistance. Applied on an at least daily basis in most Australian inpatient unit palliative care services. The measure will be used to report the patient cohort's functional status at participating sites.

The **Palliative Care Phase**<sup>32</sup> classification is not a validated tool, but is applied on an at least daily basis in most Australian palliative care services to describe the needs of the patient and family and prompt a timely and appropriate clinical response. Phases are: 1. Stable (problems and symptoms are adequately managed and there is a plan of care); 2. Unstable (urgent intervention required because a new symptom or problem develops, or an existing problem rapidly escalates); 3. Deteriorating (a gradual decline in function AND worsening of an existing problem or development of a new but anticipated problem); 4. Terminal (death is likely within days); and 5. Bereavement (post death support). The measure will be used to report the patient cohort's palliative care needs at participating sites.

The **Nursing Delirium Screening Scale (Nu-DESC)**<sup>24</sup> was validated in an oncology inpatient population with a sensitivity of 85.7% and specificity of 86.8%.<sup>24</sup> It is a brief (less than one minute) five-item and low burden tool, incorporating nurses' observation of disorientation, inappropriate behavior, inappropriate communication, illusions/hallucinations and psychomotor retardation. Nurses assign a score of 0–2 for each item, giving a maximum score of 10. The psychomotor retardation item improves recognition of hypoactive delirium,<sup>33</sup> the most prevalent subtype in palliative care inpatient populations.<sup>3</sup> The Nu-DESC has been used in previous research in inpatient palliative care populations<sup>11</sup> and considered feasible and acceptable by palliative care nurses.<sup>19</sup> The Nu-DESC will be used by bedside nurses to screen patients for delirium every eight-hour shift.

The **DSM-5 diagnostic criteria for delirium** are within the most current version of the American Psychiatric Association: Diagnostic and Statistical Manual of Mental Disorders.<sup>1</sup> Criteria are: A.

## The PRESERVE pilot study

1  
2  
3 Disturbed attention and awareness; B. Disturbance developed over a short period of time (usually  
4 hours to a few days), is a change from baseline attention and awareness, and fluctuates in severity; C.  
5 An additional disturbance in cognition; D. Disturbances in A and C are not caused by another  
6 neurocognitive disorder nor occur in the context of severely reduced level of arousal; and E. The  
7 disturbance is a direct physiological consequence of another medical condition, substance  
8 intoxication or withdrawal, exposure to a toxin, or has multiple aetiologies. Treating physicians will  
9 use the DSM-5 to determine a delirium diagnosis.  
10  
11  
12

13 The **Delirium Rating Scale-Revised-98 (DRS-R-98)**<sup>25</sup> is a 16-item delirium severity and diagnostic  
14 scale with scores of up to 46. It had high inter-rater reliability, sensitivity and specificity in the  
15 original validation study,<sup>25</sup> high sensitivity and adequate internal consistency and factor validity in  
16 cancer patients,<sup>34</sup> and has been used in research with palliative care inpatients.<sup>35,36</sup> The DRS-R-98 was  
17 designed to measure a wider range of delirium symptoms than are contained within diagnostic criteria  
18 and in different settings had good discriminative capacity for all, including in a patient population  
19 with a high prevalence of dementia<sup>37,38</sup>. Severity items are: sleep-wake cycle disturbance; perceptual  
20 disturbances and hallucinations; delusions; lability of affect; language; thought process abnormalities;  
21 motor agitation; motor retardation; orientation; attention; short-term memory; long-term memory;  
22 visuospatial ability. Diagnostic items are temporal onset of symptoms; fluctuation of symptom  
23 severity; physical disorder. Information is obtained from all sources, including physical examination,  
24 history gathering and formal cognitive testing. Requires clinician training, with guidance for use  
25 contained within the tool. Trained treating physicians and nurses will use the DRS-R-98 to  
26 operationalize delirium diagnosis and measure delirium severity. We will use a diagnostic cut-off  
27 score of  $\geq 15$ .<sup>38</sup>  
28  
29  
30  
31  
32  
33  
34  
35  
36  
37  
38  
39  
40  
41  
42  
43  
44  
45  
46  
47  
48  
49  
50  
51  
52  
53  
54  
55  
56  
57  
58  
59  
60

## The PRESERVE pilot study

### Outcomes

The primary outcome is adherence to the intervention. A rate of at least 60% of patients having at least four completed domains for at least five of the first seven days of admission will be considered minimum evidence that the intervention is feasible without need for major modification of the intervention or its delivery methods. Endpoints will be at completion of the intervention and modified-intervention arms (Figure 1).

We chose this moderate endpoint because of the potential patient, clinician and system level challenges to the non-pharmacological strategies in the context of advanced cancer. Consensus by investigators was this endpoint would be the minimum to still have impact, realistic to achieve in practice, and ensure that further evaluation of this complex intervention was not prematurely stopped. The waitlist control design will allow two endpoints and thereby maximize the potential to reach this level of adherence to the intervention.

Secondary outcomes will further inform of the feasibility, acceptability and potential efficacy of a phase III trial of the intervention in this patient population and setting, as follows:

1. Coverage: delivery rate of the multicomponent intervention to consecutive eligible patients admitted to the unit, reasons why the intervention was not delivered, weekend coverage, measured via screening logs and case report forms;
2. Fidelity to delirium screening, diagnosis and the intervention: degree of alignment with the protocol, rationales for adaptation, rate of protocol deviations without reasons, measured via case report forms;
3. Methods, areas and levels of interdisciplinary involvement in delivery of the intervention, measured via intervention checklist;
4. Feasibility and acceptability of the study intervention and measures for patients, caregivers, staff and volunteers, measured via brief interviews during and shortly after the intervention phase;

## The PRESERVE pilot study

5. Sustainability of the intervention: Adherence will be measured for all inpatients over one week, six months after commencement of data collection at the intervention sites;
6. Feasibility of the sample: percentage of participants included in data collection, reasons for non-inclusion, time to achieve sample size, measured via screening logs and case report forms;
7. Number of people with advanced breast cancer admitted to the units, number of these who are in underserved populations (patients over 70, indigenous patients, and culturally and linguistically diverse backgrounds), and the number who experience an episode of delirium (total, and in under-served populations) (for the purposes of reporting to the trial funder, the National Breast Cancer Foundation);
8. Percentage completion of all study measures, measured via case report form;
9. Rate of patients with a positive delirium screen, measured according to a score of 2 or more on the Nu-DESC at least once during each 24-hour period;
10. Delirium incidence, measured at first onset according to the DSM-5 diagnostic criteria for delirium applied within 24-hours of a positive delirium screen;
11. Delirium severity measured at first onset, using the DRS-R-98; and
12. Number of falls, complaints and other adverse events related to the intervention.

### **Sub-study**

A qualitative sub-study will be conducted to obtain patient, family caregiver, staff and volunteer perceptions of the feasibility and acceptability of the intervention strategies (e.g. receiving information from staff about delirium) and study measures via brief, semi-structured interviews (Figure 2).

### *Inclusion and exclusion criteria for the sub-study*

1. **Patients** will be included if they are aged 18 years or older; have a diagnosis of advanced cancer; admitted to an intervention site and received the intervention; speak English or have access to a health care interpreter; and able to give fully informed

## The PRESERVE pilot study

1  
2  
3 written consent. Patients with advanced breast cancer will be purposively recruited to  
4 participate in the interviews. Patients will be excluded if they have an AKPS <sup>30</sup> score  
5 less than 30 and are in the ‘terminal’ Palliative Care Phase; <sup>32</sup>  
6  
7

- 8  
9  
10 2. **Family caregivers** will be included if they are aged 18 years or older; identified as a  
11 caregiver of a patient who received the intervention; English speaking or have  
12 availability of a health care interpreter; and are able to give fully informed written  
13 consent;  
14  
15  
16  
17  
18 3. **Site staff** will be included if they are employed at an intervention site and involved in  
19 implementing the delirium measures and/or the intervention; and  
20  
21  
22  
23 4. **Site volunteers** will be included if they are aged 18 years or older, enrolled in a  
24 formal volunteer program at an intervention site and involved in implementing the  
25 intervention.  
26  
27  
28  
29

*Sub-study consent process*

30  
31 A researcher who is not a study investigator will obtain written informed consent from  
32 patients, family caregivers, staff and volunteers to participate in the brief interviews. For  
33 patients and family caregivers, the researcher will check with the clinical team to make sure  
34 the person meets the broad criteria for consideration of eligibility, is well enough, and has  
35 given permission to be approached by a researcher, before introducing him or herself to the  
36 person and explaining the study. For staff and volunteers, the researcher will consult with the  
37 site investigator before approaching potential participants.  
38  
39  
40  
41  
42  
43  
44  
45  
46

47  
48 Participant consent will be a process of information exchange between the researcher, the  
49 potential participant and any other person the potential participant believes should be  
50 included in the discussion. Participant information sheets will be the basis for discussion and  
51 cover all procedures and possible benefits and burdens of participating. The potential  
52 participant will be given sufficient opportunity to consider the study and ask questions. Any  
53  
54  
55  
56  
57  
58  
59

1 The PRESERVE pilot study

2 questions will be addressed and answered fully. The completed consent form will be copied  
3 and one copy will be given to the participant, one copy inserted in the medical file (for  
4 patients), and one copy filed in study file.  
5  
6  
7  
8

## 9 **Analysis**

### 10 *Statistical analysis of primary outcome (adherence)*

11  
12  
13 Adherence will be calculated as the rate to which patients have completed domains on a daily  
14 basis for the first seven days of admission. Degree of adherence to individual strategies will  
15 also be calculated as proportions.  
16  
17  
18  
19  
20  
21

### 22 *Statistical analysis of secondary outcomes*

23  
24 Data on all outcomes will be summarised with descriptive statistics including their  
25 distribution. Frequency and percentage will be used for summarising categorical variables  
26 and mean, standard deviation, median, and interquartile range for continuous variables.  
27  
28  
29  
30  
31  
32 Delirium incidence and severity will be determined at both the intervention and control sites.  
33  
34

### 35 *Qualitative analysis*

36  
37 Participant interviews will be analysed using thematic content analysis to identify emergent  
38 themes and trends related to participants' perceptions of the feasibility and acceptability of  
39 the intervention elements and delirium measures.<sup>39</sup>  
40  
41  
42  
43  
44

### 45 *Sample size*

46  
47 A sample size of four sites and 40 patient participants (10 from each site) was considered  
48 sufficient for reasonable estimation of feasibility and percentage completion of study  
49 processes and measures during the first phase.<sup>40</sup> We will collect de-identified data on all  
50 eligible patients admitted to all sites until data is collected for 40 patients overall, with at  
51  
52  
53  
54  
55  
56  
57  
58  
59  
60

The PRESERVE pilot study

least 20 in the intervention arm. If the intervention is found to need modification, data will be collected for a further 20 patient participants at the two waitlist control sites.

This sample size was based on that projected for the future phase III cluster RCT of the intervention with: two parallel arms, 50% delirium incidence in the control, 30% delirium incidence in the intervention group, cluster size of 30 and intra-class correlation of 0.05, type I error rate of 5%, 80% power to reject the null hypothesis, and 30% attrition. This calculation results in a projected phase III trial sample size of nine clusters and 280 patient participants.

For the sub-study, sample size will be determined when data saturation is achieved.

### **Trial monitoring**

In addition to falls and complaints, all adverse events will be recorded. Site investigators will assess the adverse event, assign the degree of relationship to the intervention, and provide information to the coordinating centre (UTS), and the approving HREC if required. Adverse events will be followed until the event is resolved, can be explained, or if the participant is lost to follow-up. Reports will contain details of follow-up investigations, results or other consultation. The investigator team will stop the study if reporting of adverse events indicates that major review of the study protocol is required. The UTS project team will report adverse event related to the intervention to the PaCCSC Trial Management Committee (TMC) within two weeks of knowledge of the event. The TMC discussions will be minuted, with actions detailed and reviewed at the subsequent meeting. The TMC chairperson's report to the PaCCSC Scientific Committee will contain a summary of the discussions of the adverse event report and agreed outcomes.

### **Data management**

An Excel spreadsheet master index will contain confidential participant contact information and be the only link between individual site and patient participants and their allocated

1 The PRESERVE pilot study

2 identification number (ID). Study data will be collected and stored on paper CRFs and  
3 electronic Excel spreadsheets and then entered onto and managed on a Research Electronic  
4 Data Capture (REDCap)<sup>41</sup> database. Audio data from participant interviews will be  
5 identified only by ID, collected on a digital recording medium and stored temporarily at the  
6 study sites until uploaded to the REDCap database. Original files will then be destroyed.  
7 Data will be held, administered, checked and analysed at the coordinating site according to  
8 relevant PaCCSC Standard Operating Procedures (SOP). Errors detected during the data  
9 checking process will generate a site data report form recording details of the query and  
10 correction and resolution instructions. The database will be updated according to site  
11 instructions via email to provide an audit trail of data changes. The coordinating site will  
12 maintain a register of data checks for monitoring purposes. Data collected at each site, such  
13 as CRFs, any corrected and amended data, copies of adverse incident reports and file notes,  
14 will be securely stored and identified by ID number only. All identifiable data (e.g. signed  
15 consent forms) will be separately stored during the recruitment period. Site research staff  
16 will send copies of study documents (with the exception of signed consent forms) to the  
17 coordinating site by registered mail for collation and archiving. All study documents will be  
18 stored in accordance with relevant State government regulations regarding the retention and  
19 disposal of participant records.

### 20 **Patient and Public Involvement**

21 The study rationale and processes were informed by the literature pertaining to patients'  
22 experiences of delirium, as outlined in the introduction.<sup>4,5</sup> Low-burden outcome measures,  
23 such as the Nursing Delirium Screening Scale, were deliberately chosen in order to minimise  
24 the impact of the study on patients with advanced illness. No patients were directly involved  
25 in the design, recruitment to or conduct of the study. Two family caregiver consumers are  
26 associate investigators of the study (MB and BN). We will include the perspectives of  
27 patients about the feasibility and acceptability of the intervention through brief semi-



The PRESERVE pilot study

structured interviews. Investigators will not have access to the names or contact information of patient or family caregiver participants in order to directly provide feedback about the study to them. At study completion, a written and verbal report of the results and findings will be provided to the participating sites.

## **Ethics and dissemination**

The study was approved by the South Western Sydney Local Health District HREC on July 19, 2017, reference number HREC/17/LPOOL/224; and ratified by the UTS HREC on August 22, 2017, reference number ETH17-1697. Minor protocol amendments were approved on April 13, 2018 (V1.1).

Reporting of this protocol adheres to the Standard Protocol Items: Recommended for Interventional Trials.<sup>42</sup> Reporting of results will adhere to the Consolidated Standards of Reporting Trials (CONSORT) guidelines for cluster RCTs and non-pharmacological treatment trials.<sup>43,44</sup> Reporting of the qualitative sub-study and implementation findings will be guided by the Consolidated Criteria for Reporting Qualitative Research (COREQ).<sup>45</sup> A comprehensive dissemination strategy will ensure that the trial results (either positive or negative) inform future research and clinical practice. Dissemination will include publication in peer-reviewed journals, presentations at conferences, study sites and key peak bodies. The investigators have no publication restrictions.

## **Strengths and limitations**

The primary strengths of this study are the cluster RCT design and that it is supported by the PaCCSC, a national, multi-site phase III clinical trials group which provides well-established rigorous research governance and access to sites with research experience and capacity. The intervention includes family partnership, which is highly valued by both patients and family.<sup>5,26</sup> We will obtain the perspectives of patients and family, which are largely absent in trials of previous multicomponent delirium interventions.<sup>15</sup>

1 The PRESERVE pilot study

2  
3 Limitations include that site and research staff will not be blinded to the intervention. Active  
4 steps will be taken to minimize contamination between intervention and waitlist control sites.

5  
6  
7 The study will be conducted in Australian palliative care inpatient settings and include only  
8 patients with advanced cancer, limiting the generalizability of results for services in other  
9  
10 geographical regions and health care systems, and for patients with other advanced illnesses.  
11  
12

### 13 14 15 **Trial status**

16  
17  
18 The study has been approved by local health district and university HRECs, local governance  
19 approvals obtained, sites randomised, the two-month period completed and data collection is  
20  
21 underway.  
22  
23

### 24 25 **List of abbreviations**

26  
27  
28 **AKPS**: Australia-modified Karnofsky Performance Status; **ACSQHC**: Australian  
29 Commission for Safety and Quality in Health Care; **BCW**: Behaviour Change Wheel; **CI**:  
30 Confidence Interval; **CONSORT**: Consolidated Standards of Reporting Trials; **COREQ**:  
31 Consolidated Criteria for Reporting Qualitative Research; **DRS-R-98**: Delirium Rating  
32 Scale-Revised-1998; **DSM-5**: Diagnostic and Statistical Manual of Mental Disorders, Fifth  
33 edition; **HREC**: Human Research Ethics Committee; **ID**: identification number; **Nu-DESC**:  
34 Nursing Delirium Screening Scale; **OR**: Odds Ratio; **PaCCSC**: Palliative Care Clinical  
35 Studies Collaborative; **PCOC**: Palliative Care Outcomes Collaborative; **RCT**: Randomised  
36 Controlled Trial; **REDCap**: Research Electronic Data Capture; **RR**: Relative Risk; **RUG-**  
37 **ADL**: Resource Utilisation Groups - Activities of Daily Living; **SOP**: Standard Operating  
38 Procedures; **UTS**: University of Technology Sydney  
39  
40  
41  
42  
43  
44  
45  
46  
47  
48  
49  
50  
51  
52  
53  
54  
55  
56  
57  
58  
59  
60

The PRESERVE pilot study

## Declarations

### *Clinical trials registration*

ACTRN12617001070325p, Australian New Zealand Clinical Trials Registry (ANZTR), <http://www.anzctr.org.au/>, 24/07/2017. The ANZTR is a Primary Registry of the World Health Organization International Clinical Trials Registry Platform (WHO ICTRP).

### *Consent for publication*

Participant information includes an explanation that results will be published in a form that maintains the confidentiality of sites and individual participants.

### *Availability of data and material*

Participant information sheets and consent forms are available at

<https://www.anzctr.org.au/Trial/Registration/TrialReview.aspx?id=373168&isReview=true>

### *Funding*

This work was supported by an Australian National Breast Cancer Foundation (NBCF) 2017 Pilot Study Grant (Grant code PS-17-030), contact details Level 9, 10 Barrack Street, Sydney, NSW 2000, Australia; T: +61 2 8098 4800 E: [info@nbcf.org.au](mailto:info@nbcf.org.au), W: <https://nbcf.org.au/>.

### *Competing interests*

The authors declare that they have no competing interests.

### *Sponsor*

The trial sponsor is PaCCSC, contact details: Level 3, 235 Jones St Ultimo NSW 2007, Australia; T. +61 (2) 9514 4862 (Sydney) /+61 (8) 7421 9726 (Adelaide), E: [paccsc@uts.edu.au](mailto:paccsc@uts.edu.au), W: [uts.edu.au/paccsc](http://uts.edu.au/paccsc). PaCCSC supports optimal trial governance through SOPs for electronic data handling, completion of CRFs, monitoring, dissemination, archiving of research materials, and record destruction; and trial infrastructure through Trials Management and Scientific Committees.

1 The PRESERVE pilot study

2  
3 *Roles and responsibilities*

4 Chief study investigators MA, AH and JP retain ultimate responsibility for the trial.

5  
6 Investigators and a project team coordinated the trial from IMPACCT - Improving Palliative,  
7 Aged and Chronic Care through Clinical Research and Translation, UTS. The investigator  
8 team meet at least twice yearly to support progress of the trial and inform related activities,  
9 such as dissemination.  
10  
11  
12  
13  
14

15  
16 **Authors' contributions**

17 AH, MA and JP are the co-lead authors and AH is the corresponding author for this  
18 manuscript. MA, JP and AH devised the adaptation of the multicomponent intervention for  
19 people with advanced cancer in hospital. MB and BN provided consumer insight into the  
20 adaptation of the intervention. AC provided guidance on the extent of alignment of the  
21 intervention and delirium screening diagnosis processes with the ACSQHC Delirium Clinical  
22 Care Standard. LL devised the statistical analysis and randomization process. JMD and ML  
23 provided insights into the waitlist design. SK contributed to the development of the site  
24 engagement and educational processes. SK, GC, RC, BL, EWE, PL and SB contributed  
25 clinical and research expertise into study design, process, measures and/or analysis. LB, BF,  
26 SLC and LE contributed to various aspects of the study protocol, including data collection,  
27 entry and storage, reporting of adverse effects, minimization of contamination, and/or site  
28 training. All authors have read and approved the final manuscript.  
29  
30  
31  
32  
33  
34  
35  
36  
37  
38  
39  
40  
41  
42  
43  
44

45 **Acknowledgements**

46 The authors gratefully acknowledge Associate Professor Andrew Teodorczuk, Dr Aileen  
47 Collier, Ms Bronwyn Heron and Dr Christine Sanderson who contributed clinical and  
48 research expertise to the development of the non-pharmacological delirium prevention  
49 intervention.  
50  
51  
52  
53  
54  
55  
56  
57  
58  
59  
60

## The PRESERVE pilot study

**References**

1. American Psychiatric Association. *Diagnostic and Statistical Manual of Mental Disorders, Fifth Edition (DSM-5)*. Arlington, VA: American Psychiatric Publisher; 2013.
2. Lawlor PG, Gagnon B, Mancini IL, et al. Occurrence, causes, and outcome of delirium in patients with advanced cancer: a prospective study. *Archives of Internal Medicine*. 2000;160(6):786-794.
3. Hosie A, Davidson PM, Agar M, Sanderson CR, Phillips J. Delirium prevalence, incidence, and implications for screening in specialist palliative care inpatient settings: A systematic review. *Palliative Medicine*. 2013;27(6):486-498.
4. O'Malley G, Leonard M, Meagher D, O'Keefe ST. The delirium experience: a review. *Journal of Psychosomatic Research*. 2008;65(3):223-228.
5. Finucane AM, Lugton J, Kennedy C, Spiller JA. The experiences of caregivers of patients with delirium, and their role in its management in palliative care settings: an integrative literature review. *Psycho-Oncology*. 2017;26(3):291-300.
6. National Institute for Health and Clinical Excellence (NICE) National Clinical Guideline centre. Delirium: diagnosis, prevention and management. 2010; <http://www.nice.org.uk/nicemedia/live/13060/49908/49908.pdf>. Accessed July 13th, 2011.
7. Australian Commission on Safety and Quality in Health Care. Evidence for the safety and care of patients with a cognitive impairment in acute care settings: a rapid review. In. Sydney: ACSQHC; 2013.
8. Leslie DL, Marcantonio ER, Zhang Y, Leo-Summers L, Inouye SK. One-year health care costs associated with delirium in the elderly population. *Archives Internal Medicine*. 2008;168(1):27-32.
9. Siddiqi N, Harrison JK, Clegg A, et al. Interventions for preventing delirium in hospitalised non-ICU patients. *Cochrane Database of Systematic Reviews*. 2016(Issue 3. Art. No.: CD005563. ).
10. Neufeld KJ, Yue J, Robinson TN, Inouye SK, Needham DM. Antipsychotic Medication for Prevention and Treatment of Delirium in Hospitalized Adults: A Systematic Review and Meta-Analysis. *Journal of the American Geriatric Society*. 2016;64(4):705-714.
11. Agar M, Lawlor PG, Quinn S, et al. Efficacy of oral risperidone, haloperidol, or placebo for symptoms of delirium among patients in palliative care: A randomised clinical trial. *JAMA Internal Medicine*. 2017;177(1):34-42.
12. Lawlor PG, Davis DHJ, Ansari M, et al. An Analytic Framework for Delirium Research in Palliative Care Settings: Integrated Epidemiological, Clinician-Researcher and Knowledge User Perspectives. *Journal of Pain and Symptom Management*. 2014;48(2):159-175.
13. Hosie A, Agar M, Lobb E, Davidson PM, Phillips J. Improving delirium recognition and assessment for people receiving inpatient palliative care: a mixed methods meta-synthesis. *International Journal of Nursing Studies*. 2017;75:123-129.
14. Hshieh TT, Yue J, Oh E, et al. Effectiveness of multicomponent nonpharmacological delirium interventions: a meta-analysis. *JAMA Internal Medicine*. 2015;175(4):512-520.
15. Hosie A, Amgarth-Duff I, Edwards L, et al. Non-pharmacological delirium interventions for adult inpatients with advanced, progressive illness: a systematic review. American Delirium Society 7th Annual Meeting; 2017; Nashville, TN.

## The PRESERVE pilot study

16. Gagnon P, Allard P, Gagnon B, Mérette C, Tardif F. Delirium prevention in terminal cancer: assessment of a multicomponent intervention. *Psycho-Oncology*. 2012;21(2):187-194.
17. Loneragan E, Luxenberg J, Areosa Sastre A. Benzodiazepines for delirium. *Cochrane Database of Systematic Reviews*. 2009(4).  
<http://www.mrw.interscience.wiley.com/cochrane/clsysrev/articles/CD006379/frame.html>.
18. Caraceni A. Drug-associated delirium in cancer patients. *European Journal of Cancer Supplements*. 2013;11(2):233-240.
19. Hosie A, Lobb E, Agar M, Davidson PM, Chye R, Phillips J. Nurse perceptions of the Nursing Delirium Screening Scale in two palliative care inpatient units: a focus group study. *Journal of Clinical Nursing*. 2015;24(22-22):3276-3285.
20. Wright DK, Brajtman S, Cragg B, Macdonald ME. Delirium as letting go: An ethnographic analysis of hospice care and family moral experience. *Palliative Medicine*. 2015;29(10):959-966.
21. Higginson IJ, Booth S. The randomised fast-track trial in palliative care: role, utility and ethics in the evaluation of interventions in palliative care? *Palliative Medicine*. 2011;25(8):741-747.
22. Palliative Care Outcomes Collaborative. 2017; <http://www.pcoc.org.au/>. August 20, 2018.
23. Gaudreau JD, Gagnon P, Harel F, Tremblay A, Roy MA. Fast, systematic, and continuous delirium assessment in hospitalized patients: the nursing delirium screening scale. *Journal of Pain and Symptom Management*. 2005;29(4):368-375.
24. Trzepacz PT, Mittal D, Torres R, Canary K, Norton J, Jimerson N. Validation of the Delirium Rating Scale-revised-98: comparison with the delirium rating scale and the cognitive test for delirium.[erratum appears in J Neuropsychiatry Clin Neurosci 2001 Summer;13(3):433]. *Journal of Neuropsychiatry & Clinical Neurosciences*. 2001;13(2):229-242.
25. Virdun C, Luckett T, Davidson PM, Phillips J. Dying in the hospital setting: A systematic review of quantitative studies identifying the elements of end-of-life care that patients and their families rank as being most important. *Palliative Medicine*. 2015.
26. Australian Commission on Quality and Safety of Healthcare. Delirium Clinical Care Standard. 2017; <https://www.safetyandquality.gov.au/our-work/clinical-care-standards/delirium-clinical-care-standard/>. Accessed August 20, 2018.
27. Michie S, Stralen MM, West R. The behaviour change wheel: a new method for characterising and designing behaviour change interventions. *Implementation Science*. 2011;6.
28. Teodorczuk A, Mukaetova-Ladinska E, Corbett S, Welfare M. Learning about the patient: an innovative interprofessional dementia and delirium education programme. *Clinical Teaching*. 2014;11(7):497-502.
29. Walsh A. An exploration of Biggs' constructive alignment in the context of work-based learning. *Assessment & Evaluation in Higher Education*. 2007;32(1):79-87.
30. Abernethy A, Shelby-James T, Fazekas B, Woods D, Currow D. The Australia-modified Karnofsky Performance Status (AKPS) scale: a revised scale for contemporary palliative care clinical practice. *BMC Palliative Care*. 2005;4(7):<http://www.biomedcentral.com/content/pdf/1472-1684X-1474-1477.pdf>.
31. Fries BE, Schneider DP, Foley WJ, Gavazzi M, Burke R, Cornelius E. Refining a casemix measure for nursing homes. Resource Utilisation Groups (RUG-III) *Medical Care*. 1994;32:668-685.

## The PRESERVE pilot study

- 1
- 2
- 3 32. Masso M, Allingham SF, Banfield M, et al. Palliative Care Phase: inter-rater
- 4 reliability and acceptability in a national study. *Palliative Medicine*. 2015;29(1):22-
- 5 30.
- 6 33. Gaudreau JD, Gagnon P, Harel F, Roy MA. Impact on delirium detection of using a
- 7 sensitive instrument integrated into clinical practice. *General Hospital Psychiatry*.
- 8 2005;27(3):194-199.
- 9 34. Grassi L, Caraceni A, Beltrami E, et al. Assessing delirium in cancer patients: the
- 10 Italian versions of the Delirium Rating Scale and the Memorial Delirium Assessment
- 11 Scale. *Journal of Pain and Symptom Management*. 2001;21(1):59-68.
- 12 35. Leonard M, Raju B, Conroy M, et al. Reversibility of delirium in terminally ill
- 13 patients and predictors of mortality. *Palliative Medicine*. 2008;22(7):848-854.
- 14 36. Leonard M, Spiller J, Keen J, MacLulich A, Kamholtz B, Meagher D. Symptoms of
- 15 depression and delirium assessed serially in palliative-care inpatients.
- 16 *Psychosomatics*. 2009;50(5):506-514.
- 17 37. Meagher DJ, Morandi A, Inouye SK, et al. Concordance between DSM-IV and DSM-
- 18 5 criteria for delirium diagnosis in a pooled database of 768 prospectively evaluated
- 19 patients using the delirium rating scale-revised-98. *BMC medicine*. 2014;12:164.
- 20 38. Sepulveda E, Franco JG, Trzepacz PT, et al. Performance of the Delirium Rating
- 21 Scale-Revised-98 Against Different Delirium Diagnostic Criteria in a Population
- 22 With a High Prevalence of Dementia. *Psychosomatics*. 2015;56(5):530-541.
- 23 39. Liamputtong P, Ezzy D. In-depth Interviews. In: *Qualitative Research Methods*. 2nd
- 24 ed. South Melbourne: Oxford University Press; 2005.
- 25 40. Cocks K, D.J. T. Sample size calculations for pilot randomised trials: a confidence
- 26 interval approach. *Journal of Clinical Epidemiology*. 2013;66(2):197-201.
- 27 41. Harris PA, Taylor R, Thielke R, Payne J, Gonzalez N, Conde JG. Research electronic
- 28 data capture (REDCap)—A metadata-driven methodology and workflow process for
- 29 providing translational research informatics support. *Journal of Biomedical*
- 30 *Informatics*. 2009;42(2):377-381.
- 31 42. Chan A, Tetzlaff JM, Altman DG, et al. SPIRIT 2013 statement: Defining standard
- 32 protocol items for clinical trials. *Annals of Internal Medicine*. 2013;158(3):200-207.
- 33 43. Boutron I, Moher D, Altman DG, Schulz KF, Ravaud P. Extending the CONSORT
- 34 statement to randomised trials of nonpharmacologic treatment: explanation and
- 35 elaboration. *Annals of Internal Medicine*. 2008;148(4):295-309.
- 36 44. Campbell MK, Piaggio G, Elbourne DR, Altman DG. Consort 2010 statement:
- 37 extension to cluster randomised trials. *BMJ*. 2012;345:e5661.
- 38 45. Tong A, Sainsbury P, Craig J. Consolidated criteria for reporting qualitative research
- 39 (COREQ): a 32-item checklist for interviews and focus groups. *International journal*
- 40 *for quality in health care : journal of the International Society for Quality in Health*
- 41 *Care / ISQua*. 2007;19.
- 42
- 43
- 44
- 45
- 46
- 47
- 48
- 49
- 50
- 51
- 52
- 53
- 54
- 55
- 56
- 57
- 58
- 59
- 60

The PRESERVE pilot study

1  
2  
3 **Figure 1: Study Diagram**

4 Standardised delirium screening at all sites + delirium prevention strategies at intervention  
5 sites; control sites wait listed for intervention  
6

7 \* Modified if required

8 **Figure 2: Schedule of study measures and time points** <sup>43</sup>  
9

10 Note: Characteristics indicated with a \* will be collected at baseline from the sites most  
11 recent PCOC report, and then again at study completion directly from PCOC for the specific  
12 time-frame of data collection at each site.  
13

14 **Table 1: Multicomponent delirium prevention intervention**  
15  
16  
17  
18  
19  
20  
21  
22  
23  
24  
25  
26  
27  
28  
29  
30  
31  
32  
33  
34  
35  
36  
37  
38  
39  
40  
41  
42  
43  
44  
45  
46  
47  
48  
49  
50  
51  
52  
53  
54  
55  
56  
57  
58  
59  
60



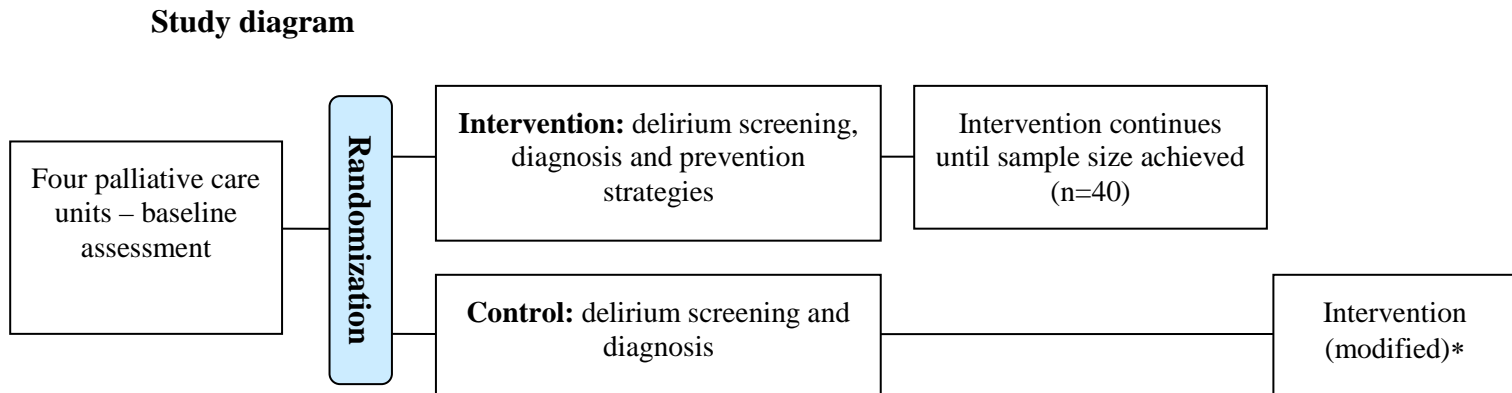

**Figure 1: Study Diagram**

Standardized delirium screening at all sites + delirium prevention strategies at intervention sites; control sites wait listed for intervention

\* Modified if required.

**Figure 2: Schedule of study measures and time points**<sup>42</sup>

| Measures                                                     | Study period                   |                                 |                    |             |                  |                    |                         |
|--------------------------------------------------------------|--------------------------------|---------------------------------|--------------------|-------------|------------------|--------------------|-------------------------|
|                                                              | Control and intervention sites |                                 |                    |             |                  | Intervention sites |                         |
|                                                              | Baseline                       | Eligibility screen on admission | Admission days 1-7 | Nu-DESC +ve | Study completion | Admission days 1-7 | Intervention completion |
| <b>UNIT LEVEL</b>                                            |                                |                                 |                    |             |                  |                    |                         |
| Geographical location                                        | X                              |                                 |                    |             |                  |                    |                         |
| Type and level of service provision                          | X                              |                                 |                    |             |                  |                    |                         |
| Number of beds                                               | X                              |                                 |                    |             |                  |                    |                         |
| Team composition                                             | X                              |                                 |                    |             |                  |                    |                         |
| Clinical documentation method                                | X                              |                                 |                    |             |                  |                    |                         |
| Delirium process and measures                                | X                              |                                 |                    |             |                  |                    |                         |
| Patient demographics*                                        | X                              |                                 |                    |             | X                |                    |                         |
| Patient function AKPS, RUG-ADL*                              | X                              |                                 |                    |             | X                |                    |                         |
| Palliative care phases*                                      | X                              |                                 |                    |             | X                |                    |                         |
| <b>PATIENT LEVEL</b>                                         |                                |                                 |                    |             |                  |                    |                         |
| Primary diagnosis                                            |                                | X                               |                    |             |                  |                    |                         |
| Age                                                          |                                | X                               |                    |             |                  |                    |                         |
| Nu-DESC                                                      |                                |                                 | X                  |             |                  |                    |                         |
| DSM-5 diagnostic criteria for delirium                       |                                |                                 |                    | X           |                  |                    |                         |
| DRS-R-98                                                     |                                |                                 |                    | X           |                  |                    |                         |
| Adherence to delirium prevention strategies                  |                                |                                 |                    |             |                  | X                  | X (six months post)     |
| <b>SUB-STUDY</b>                                             |                                |                                 |                    |             |                  |                    |                         |
| Brief interviews with patients, family, staff and volunteers |                                |                                 |                    |             |                  |                    | X                       |

Note: Characteristics indicated with a \* will be collected at baseline from the sites most recent PCOC report, and then again at study completion directly from PCOC for the specific time-frame of data collection at each site.

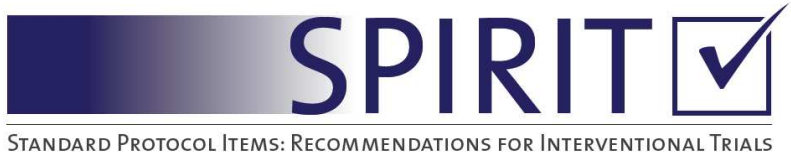

SPIRIT 2013 Checklist: Recommended items to address in a clinical trial protocol and related documents\*

| Section/item                      | Item No | Description                                                                                                                                                                                                                                                                              | Addressed on page number |
|-----------------------------------|---------|------------------------------------------------------------------------------------------------------------------------------------------------------------------------------------------------------------------------------------------------------------------------------------------|--------------------------|
| <b>Administrative information</b> |         |                                                                                                                                                                                                                                                                                          |                          |
| Title                             | 1       | Descriptive title identifying the study design, population, interventions, and, if applicable, trial acronym                                                                                                                                                                             | Title page               |
| Trial registration                | 2a      | Trial identifier and registry name. If not yet registered, name of intended registry                                                                                                                                                                                                     | 3 and 25                 |
|                                   | 2b      | All items from the World Health Organization Trial Registration Data Set                                                                                                                                                                                                                 | 25                       |
| Protocol version                  | 3       | Date and version identifier                                                                                                                                                                                                                                                              | 24                       |
| Funding                           | 4       | Sources and types of financial, material, and other support                                                                                                                                                                                                                              | 26                       |
| Roles and responsibilities        | 5a      | Names, affiliations, and roles of protocol contributors                                                                                                                                                                                                                                  | Title page               |
|                                   | 5b      | Name and contact information for the trial sponsor                                                                                                                                                                                                                                       | 26                       |
|                                   | 5c      | Role of study sponsor and funders, if any, in study design; collection, management, analysis, and interpretation of data; writing of the report; and the decision to submit the report for publication, including whether they will have ultimate authority over any of these activities | 26                       |
|                                   | 5d      | Composition, roles, and responsibilities of the coordinating centre, steering committee, endpoint adjudication committee, data management team, and other individuals or groups overseeing the trial, if applicable (see Item 21a for data monitoring committee)                         | 26                       |

## Introduction

|                          |    |                                                                                                                                                                                                           |     |
|--------------------------|----|-----------------------------------------------------------------------------------------------------------------------------------------------------------------------------------------------------------|-----|
| Background and rationale | 6a | Description of research question and justification for undertaking the trial, including summary of relevant studies (published and unpublished) examining benefits and harms for each intervention        | 4-6 |
|                          | 6b | Explanation for choice of comparators                                                                                                                                                                     | 7-8 |
| Objectives               | 7  | Specific objectives or hypotheses                                                                                                                                                                         | 6-7 |
| Trial design             | 8  | Description of trial design including type of trial (eg, parallel group, crossover, factorial, single group), allocation ratio, and framework (eg, superiority, equivalence, noninferiority, exploratory) | 7-8 |

## Methods: Participants, interventions, and outcomes

|                      |     |                                                                                                                                                                                                                                                                                                                                                                                |          |
|----------------------|-----|--------------------------------------------------------------------------------------------------------------------------------------------------------------------------------------------------------------------------------------------------------------------------------------------------------------------------------------------------------------------------------|----------|
| Study setting        | 9   | Description of study settings (eg, community clinic, academic hospital) and list of countries where data will be collected. Reference to where list of study sites can be obtained                                                                                                                                                                                             | 8        |
| Eligibility criteria | 10  | Inclusion and exclusion criteria for participants. If applicable, eligibility criteria for study centres and individuals who will perform the interventions (eg, surgeons, psychotherapists)                                                                                                                                                                                   | 8; 19-20 |
| Interventions        | 11a | Interventions for each group with sufficient detail to allow replication, including how and when they will be administered                                                                                                                                                                                                                                                     | 8-9      |
|                      | 11b | Criteria for discontinuing or modifying allocated interventions for a given trial participant (eg, drug dose change in response to harms, participant request, or improving/worsening disease)                                                                                                                                                                                 | 8-9, 12  |
|                      | 11c | Strategies to improve adherence to intervention protocols, and any procedures for monitoring adherence (eg, drug tablet return, laboratory tests)                                                                                                                                                                                                                              | 12-13    |
|                      | 11d | Relevant concomitant care and interventions that are permitted or prohibited during the trial                                                                                                                                                                                                                                                                                  | 9        |
| Outcomes             | 12  | Primary, secondary, and other outcomes, including the specific measurement variable (eg, systolic blood pressure), analysis metric (eg, change from baseline, final value, time to event), method of aggregation (eg, median, proportion), and time point for each outcome. Explanation of the clinical relevance of chosen efficacy and harm outcomes is strongly recommended | 18-19    |
| Participant timeline | 13  | Time schedule of enrolment, interventions (including any run-ins and washouts), assessments, and visits for participants. A schematic diagram is highly recommended (see Figure)                                                                                                                                                                                               | Figure 2 |
| Sample size          | 14  | Estimated number of participants needed to achieve study objectives and how it was determined, including clinical and statistical assumptions supporting any sample size calculations                                                                                                                                                                                          | 21-22    |

|    |                                                                     |     |                                                                                                                                                                                                                                                                                                                                                                                                              |       |
|----|---------------------------------------------------------------------|-----|--------------------------------------------------------------------------------------------------------------------------------------------------------------------------------------------------------------------------------------------------------------------------------------------------------------------------------------------------------------------------------------------------------------|-------|
| 1  |                                                                     |     |                                                                                                                                                                                                                                                                                                                                                                                                              |       |
| 2  | Recruitment                                                         | 15  | Strategies for achieving adequate participant enrolment to reach target sample size                                                                                                                                                                                                                                                                                                                          | 21-22 |
| 3  |                                                                     |     |                                                                                                                                                                                                                                                                                                                                                                                                              |       |
| 4  |                                                                     |     |                                                                                                                                                                                                                                                                                                                                                                                                              |       |
| 5  | <b>Methods: Assignment of interventions (for controlled trials)</b> |     |                                                                                                                                                                                                                                                                                                                                                                                                              |       |
| 6  | Allocation:                                                         |     |                                                                                                                                                                                                                                                                                                                                                                                                              |       |
| 7  |                                                                     |     |                                                                                                                                                                                                                                                                                                                                                                                                              |       |
| 8  | Sequence generation                                                 | 16a | Method of generating the allocation sequence (eg, computer-generated random numbers), and list of any factors for stratification. To reduce predictability of a random sequence, details of any planned restriction (eg, blocking) should be provided in a separate document that is unavailable to those who enrol participants or assign interventions                                                     | 13    |
| 9  |                                                                     |     |                                                                                                                                                                                                                                                                                                                                                                                                              |       |
| 10 |                                                                     |     |                                                                                                                                                                                                                                                                                                                                                                                                              |       |
| 11 |                                                                     |     |                                                                                                                                                                                                                                                                                                                                                                                                              |       |
| 12 |                                                                     |     |                                                                                                                                                                                                                                                                                                                                                                                                              |       |
| 13 | Allocation concealment mechanism                                    | 16b | Mechanism of implementing the allocation sequence (eg, central telephone; sequentially numbered, opaque, sealed envelopes), describing any steps to conceal the sequence until interventions are assigned                                                                                                                                                                                                    | 13    |
| 14 |                                                                     |     |                                                                                                                                                                                                                                                                                                                                                                                                              |       |
| 15 |                                                                     |     |                                                                                                                                                                                                                                                                                                                                                                                                              |       |
| 16 | Implementation                                                      | 16c | Who will generate the allocation sequence, who will enrol participants, and who will assign participants to interventions                                                                                                                                                                                                                                                                                    | 13    |
| 17 |                                                                     |     |                                                                                                                                                                                                                                                                                                                                                                                                              |       |
| 18 |                                                                     |     |                                                                                                                                                                                                                                                                                                                                                                                                              |       |
| 19 | Blinding (masking)                                                  | 17a | Who will be blinded after assignment to interventions (eg, trial participants, care providers, outcome assessors, data analysts), and how                                                                                                                                                                                                                                                                    | 13-14 |
| 20 |                                                                     |     |                                                                                                                                                                                                                                                                                                                                                                                                              |       |
| 21 |                                                                     |     |                                                                                                                                                                                                                                                                                                                                                                                                              |       |
| 22 |                                                                     | 17b | If blinded, circumstances under which unblinding is permissible, and procedure for revealing a participant's allocated intervention during the trial                                                                                                                                                                                                                                                         | NA    |
| 23 |                                                                     |     |                                                                                                                                                                                                                                                                                                                                                                                                              |       |
| 24 |                                                                     |     |                                                                                                                                                                                                                                                                                                                                                                                                              |       |
| 25 | <b>Methods: Data collection, management, and analysis</b>           |     |                                                                                                                                                                                                                                                                                                                                                                                                              |       |
| 26 |                                                                     |     |                                                                                                                                                                                                                                                                                                                                                                                                              |       |
| 27 | Data collection methods                                             | 18a | Plans for assessment and collection of outcome, baseline, and other trial data, including any related processes to promote data quality (eg, duplicate measurements, training of assessors) and a description of study instruments (eg, questionnaires, laboratory tests) along with their reliability and validity, if known. Reference to where data collection forms can be found, if not in the protocol | 14-15 |
| 28 |                                                                     |     |                                                                                                                                                                                                                                                                                                                                                                                                              |       |
| 29 |                                                                     |     |                                                                                                                                                                                                                                                                                                                                                                                                              |       |
| 30 |                                                                     |     |                                                                                                                                                                                                                                                                                                                                                                                                              |       |
| 31 |                                                                     | 18b | Plans to promote participant retention and complete follow-up, including list of any outcome data to be collected for participants who discontinue or deviate from intervention protocols                                                                                                                                                                                                                    | NA    |
| 32 |                                                                     |     |                                                                                                                                                                                                                                                                                                                                                                                                              |       |
| 33 |                                                                     |     |                                                                                                                                                                                                                                                                                                                                                                                                              |       |
| 34 | Data management                                                     | 19  | Plans for data entry, coding, security, and storage, including any related processes to promote data quality (eg, double data entry; range checks for data values). Reference to where details of data management procedures can be found, if not in the protocol                                                                                                                                            | 22-23 |
| 35 |                                                                     |     |                                                                                                                                                                                                                                                                                                                                                                                                              |       |
| 36 |                                                                     |     |                                                                                                                                                                                                                                                                                                                                                                                                              |       |
| 37 |                                                                     |     |                                                                                                                                                                                                                                                                                                                                                                                                              |       |
| 38 | Statistical methods                                                 | 20a | Statistical methods for analysing primary and secondary outcomes. Reference to where other details of the statistical analysis plan can be found, if not in the protocol                                                                                                                                                                                                                                     | 21    |
| 39 |                                                                     |     |                                                                                                                                                                                                                                                                                                                                                                                                              |       |
| 40 |                                                                     | 20b | Methods for any additional analyses (eg, subgroup and adjusted analyses)                                                                                                                                                                                                                                                                                                                                     | NA    |
| 41 |                                                                     |     |                                                                                                                                                                                                                                                                                                                                                                                                              |       |
| 42 |                                                                     |     |                                                                                                                                                                                                                                                                                                                                                                                                              |       |
| 43 |                                                                     |     |                                                                                                                                                                                                                                                                                                                                                                                                              |       |
| 44 |                                                                     |     |                                                                                                                                                                                                                                                                                                                                                                                                              |       |
| 45 |                                                                     |     |                                                                                                                                                                                                                                                                                                                                                                                                              |       |
| 46 |                                                                     |     |                                                                                                                                                                                                                                                                                                                                                                                                              |       |
| 47 |                                                                     |     |                                                                                                                                                                                                                                                                                                                                                                                                              |       |

|    |                                 |     |                                                                                                                                                                                                                                                                                                                                       |           |
|----|---------------------------------|-----|---------------------------------------------------------------------------------------------------------------------------------------------------------------------------------------------------------------------------------------------------------------------------------------------------------------------------------------|-----------|
| 1  |                                 |     |                                                                                                                                                                                                                                                                                                                                       |           |
| 2  |                                 | 20c | Definition of analysis population relating to protocol non-adherence (eg, as randomised analysis), and any statistical methods to handle missing data (eg, multiple imputation)                                                                                                                                                       | NA        |
| 3  |                                 |     |                                                                                                                                                                                                                                                                                                                                       |           |
| 4  |                                 |     |                                                                                                                                                                                                                                                                                                                                       |           |
| 5  |                                 |     |                                                                                                                                                                                                                                                                                                                                       |           |
| 6  | <b>Methods: Monitoring</b>      |     |                                                                                                                                                                                                                                                                                                                                       |           |
| 7  | Data monitoring                 | 21a | Composition of data monitoring committee (DMC); summary of its role and reporting structure; statement of whether it is independent from the sponsor and competing interests; and reference to where further details about its charter can be found, if not in the protocol. Alternatively, an explanation of why a DMC is not needed | 22        |
| 8  |                                 |     |                                                                                                                                                                                                                                                                                                                                       |           |
| 9  |                                 | 21b | Description of any interim analyses and stopping guidelines, including who will have access to these interim results and make the final decision to terminate the trial                                                                                                                                                               | 22        |
| 10 |                                 |     |                                                                                                                                                                                                                                                                                                                                       |           |
| 11 |                                 |     |                                                                                                                                                                                                                                                                                                                                       |           |
| 12 |                                 |     |                                                                                                                                                                                                                                                                                                                                       |           |
| 13 |                                 |     |                                                                                                                                                                                                                                                                                                                                       |           |
| 14 | Harms                           | 22  | Plans for collecting, assessing, reporting, and managing solicited and spontaneously reported adverse events and other unintended effects of trial interventions or trial conduct                                                                                                                                                     | 22        |
| 15 |                                 |     |                                                                                                                                                                                                                                                                                                                                       |           |
| 16 |                                 |     |                                                                                                                                                                                                                                                                                                                                       |           |
| 17 | Auditing                        | 23  | Frequency and procedures for auditing trial conduct, if any, and whether the process will be independent from investigators and the sponsor                                                                                                                                                                                           | NA        |
| 18 |                                 |     |                                                                                                                                                                                                                                                                                                                                       |           |
| 19 |                                 |     |                                                                                                                                                                                                                                                                                                                                       |           |
| 20 |                                 |     |                                                                                                                                                                                                                                                                                                                                       |           |
| 21 | <b>Ethics and dissemination</b> |     |                                                                                                                                                                                                                                                                                                                                       |           |
| 22 | Research ethics approval        | 24  | Plans for seeking research ethics committee/institutional review board (REC/IRB) approval                                                                                                                                                                                                                                             | 24        |
| 23 |                                 |     |                                                                                                                                                                                                                                                                                                                                       |           |
| 24 |                                 |     |                                                                                                                                                                                                                                                                                                                                       |           |
| 25 | Protocol amendments             | 25  | Plans for communicating important protocol modifications (eg, changes to eligibility criteria, outcomes, analyses) to relevant parties (eg, investigators, REC/IRBs, trial participants, trial registries, journals, regulators)                                                                                                      | NA        |
| 26 |                                 |     |                                                                                                                                                                                                                                                                                                                                       |           |
| 27 |                                 |     |                                                                                                                                                                                                                                                                                                                                       |           |
| 28 |                                 |     |                                                                                                                                                                                                                                                                                                                                       |           |
| 29 | Consent or assent               | 26a | Who will obtain informed consent or assent from potential trial participants or authorised surrogates, and how (see Item 32)                                                                                                                                                                                                          | 8, 20-21  |
| 30 |                                 |     |                                                                                                                                                                                                                                                                                                                                       |           |
| 31 |                                 | 26b | Additional consent provisions for collection and use of participant data and biological specimens in ancillary studies, if applicable                                                                                                                                                                                                 | NA        |
| 32 |                                 |     |                                                                                                                                                                                                                                                                                                                                       |           |
| 33 |                                 |     |                                                                                                                                                                                                                                                                                                                                       |           |
| 34 | Confidentiality                 | 27  | How personal information about potential and enrolled participants will be collected, shared, and maintained in order to protect confidentiality before, during, and after the trial                                                                                                                                                  | 22-23, 26 |
| 35 |                                 |     |                                                                                                                                                                                                                                                                                                                                       |           |
| 36 |                                 |     |                                                                                                                                                                                                                                                                                                                                       |           |
| 37 | Declaration of interests        | 28  | Financial and other competing interests for principal investigators for the overall trial and each study site                                                                                                                                                                                                                         | 26        |
| 38 |                                 |     |                                                                                                                                                                                                                                                                                                                                       |           |
| 39 | Access to data                  | 29  | Statement of who will have access to the final trial dataset, and disclosure of contractual agreements that limit such access for investigators                                                                                                                                                                                       | 22-24     |
| 40 |                                 |     |                                                                                                                                                                                                                                                                                                                                       |           |
| 41 |                                 |     |                                                                                                                                                                                                                                                                                                                                       |           |
| 42 |                                 |     |                                                                                                                                                                                                                                                                                                                                       |           |
| 43 |                                 |     |                                                                                                                                                                                                                                                                                                                                       |           |
| 44 |                                 |     |                                                                                                                                                                                                                                                                                                                                       |           |
| 45 |                                 |     |                                                                                                                                                                                                                                                                                                                                       |           |
| 46 |                                 |     |                                                                                                                                                                                                                                                                                                                                       |           |
| 47 |                                 |     |                                                                                                                                                                                                                                                                                                                                       |           |

1  
2  
3  
4  
5  
6  
7  
8  
9  
10  
11  
12  
13  
14  
15  
16  
17  
18  
19  
20  
21  
22  
23  
24  
25  
26  
27  
28  
29  
30  
31  
32  
33  
34  
35  
36  
37  
38  
39  
40  
41  
42  
43  
44  
45  
46  
47

|                               |     |                                                                                                                                                                                                                                                                                     |    |
|-------------------------------|-----|-------------------------------------------------------------------------------------------------------------------------------------------------------------------------------------------------------------------------------------------------------------------------------------|----|
| Ancillary and post-trial care | 30  | Provisions, if any, for ancillary and post-trial care, and for compensation to those who suffer harm from trial participation                                                                                                                                                       | NA |
| Dissemination policy          | 31a | Plans for investigators and sponsor to communicate trial results to participants, healthcare professionals, the public, and other relevant groups (eg, via publication, reporting in results databases, or other data sharing arrangements), including any publication restrictions | 24 |
|                               | 31b | Authorship eligibility guidelines and any intended use of professional writers                                                                                                                                                                                                      | 27 |
|                               | 31c | Plans, if any, for granting public access to the full protocol, participant-level dataset, and statistical code                                                                                                                                                                     | 26 |
| <b>Appendices</b>             |     |                                                                                                                                                                                                                                                                                     |    |
| Informed consent materials    | 32  | Model consent form and other related documentation given to participants and authorised surrogates                                                                                                                                                                                  | 26 |
| Biological specimens          | 33  | Plans for collection, laboratory evaluation, and storage of biological specimens for genetic or molecular analysis in the current trial and for future use in ancillary studies, if applicable                                                                                      | NA |

---

\*It is strongly recommended that this checklist be read in conjunction with the SPIRIT 2013 Explanation & Elaboration for important clarification on the items. Amendments to the protocol should be tracked and dated. The SPIRIT checklist is copyrighted by the SPIRIT Group under the Creative Commons "[Attribution-NonCommercial-NoDerivs 3.0 Unported](https://creativecommons.org/licenses/by-nc-nd/3.0/)" license.

# BMJ Open

## Multicomponent non-pharmacological intervention to prevent delirium for hospitalised people with advanced cancer: study protocol for a phase II cluster randomised controlled trial

|                               |                                                                                                                                                                                                                                                                                                                                                                                                                                                                                                                                                                                                                                                                                                                                                                                                                                                                                                                                                                                                                                                                                                                                                                                                                                                                                                                                                                                                                                                                                                                                                                                                                                                                                                                                                                                                                                                                                                                                                                                                                                                                                                                                                                                                                           |
|-------------------------------|---------------------------------------------------------------------------------------------------------------------------------------------------------------------------------------------------------------------------------------------------------------------------------------------------------------------------------------------------------------------------------------------------------------------------------------------------------------------------------------------------------------------------------------------------------------------------------------------------------------------------------------------------------------------------------------------------------------------------------------------------------------------------------------------------------------------------------------------------------------------------------------------------------------------------------------------------------------------------------------------------------------------------------------------------------------------------------------------------------------------------------------------------------------------------------------------------------------------------------------------------------------------------------------------------------------------------------------------------------------------------------------------------------------------------------------------------------------------------------------------------------------------------------------------------------------------------------------------------------------------------------------------------------------------------------------------------------------------------------------------------------------------------------------------------------------------------------------------------------------------------------------------------------------------------------------------------------------------------------------------------------------------------------------------------------------------------------------------------------------------------------------------------------------------------------------------------------------------------|
| Journal:                      | <i>BMJ Open</i>                                                                                                                                                                                                                                                                                                                                                                                                                                                                                                                                                                                                                                                                                                                                                                                                                                                                                                                                                                                                                                                                                                                                                                                                                                                                                                                                                                                                                                                                                                                                                                                                                                                                                                                                                                                                                                                                                                                                                                                                                                                                                                                                                                                                           |
| Manuscript ID                 | bmjopen-2018-026177.R2                                                                                                                                                                                                                                                                                                                                                                                                                                                                                                                                                                                                                                                                                                                                                                                                                                                                                                                                                                                                                                                                                                                                                                                                                                                                                                                                                                                                                                                                                                                                                                                                                                                                                                                                                                                                                                                                                                                                                                                                                                                                                                                                                                                                    |
| Article Type:                 | Protocol                                                                                                                                                                                                                                                                                                                                                                                                                                                                                                                                                                                                                                                                                                                                                                                                                                                                                                                                                                                                                                                                                                                                                                                                                                                                                                                                                                                                                                                                                                                                                                                                                                                                                                                                                                                                                                                                                                                                                                                                                                                                                                                                                                                                                  |
| Date Submitted by the Author: | 26-Nov-2018                                                                                                                                                                                                                                                                                                                                                                                                                                                                                                                                                                                                                                                                                                                                                                                                                                                                                                                                                                                                                                                                                                                                                                                                                                                                                                                                                                                                                                                                                                                                                                                                                                                                                                                                                                                                                                                                                                                                                                                                                                                                                                                                                                                                               |
| Complete List of Authors:     | <p>Hosie, Annmarie; University of Technology Sydney, IMPACCT - Improving Palliative, Aged and Chronic Care through Clinical Research and Translation</p> <p>Phillips, Jane; University of Technology Sydney, IMPACCT - Improving Palliative, Aged and Chronic Care through Clinical Research and Translation</p> <p>Lam, Lawrence; University of Technology Sydney, IMPACCT - Improving Palliative, Aged and Chronic Care through Clinical Research and Translation</p> <p>Kochovska, Slavica; University of Technology Sydney Faculty of Health, IMPACCT - Improving Palliative, Aged and Chronic Care through Clinical Research and Translation</p> <p>Noble, Beverly; University of Technology Sydney, IMPACCT - Improving Palliative, Aged and Chronic Care through Clinical Research and Translation</p> <p>Brassil, Meg; University of Technology Sydney, IMPACCT - Improving Palliative, Aged and Chronic Care through Clinical Research and Translation</p> <p>Kurrle, Susan; Hornsby Ku-ring-gai Health Service, University of Sydney, Northern Clinical School</p> <p>Cumming, Anne; Australian Commission on Safety and Quality in Healthcare</p> <p>Caplan, Gideon; Prince of Wales Hospital, Geriatric Medicine; University of New South Wales</p> <p>Chye, Richard; St. Vincent's Hospital, Sacred Heart Health Service</p> <p>Le, Brian; Royal Melbourne Hospital, Palliative and Supportive Services</p> <p>Ely, E. Wesley; Vanderbilt University Medical Center, Center for Critical Illness, Brain dysfunction &amp; Survivorship (CIBS)</p> <p>Lawlor, Peter; University of Ottawa, Department of Medicine</p> <p>Bush, Shirley H.; University of Ottawa, Department of Medicine</p> <p>Davis, Jan Maree; Calvary Health Care Kogarah, Palliative Care</p> <p>Lovell, Melanie; Hornsby Ku-ring-gai Health Service, University of Sydney, Northern Clinical School; Greenwich Hospital, HammondCare</p> <p>Brown, Linda; University of Technology Sydney, IMPACCT - Improving Palliative, Aged and Chronic Care through Clinical Research and Translation</p> <p>Fazekas, Belinda; University of Technology Sydney, IMPACCT - Improving Palliative, Aged and Chronic Care through Clinical Research</p> |



|                                    |                                                                                                                                                                                                                                                                                                                                                                                                                                                        |
|------------------------------------|--------------------------------------------------------------------------------------------------------------------------------------------------------------------------------------------------------------------------------------------------------------------------------------------------------------------------------------------------------------------------------------------------------------------------------------------------------|
|                                    | and Translation<br>Cheah, Seong; University of Technology Sydney Faculty of Health,<br>Centre for Midwifery, Child and Family Health<br>Edwards, Layla; University of Technology Sydney, IMPACCT - Improving<br>Palliative, Aged and Chronic Care through Clinical Research and<br>Translation<br>Agar, Meera ; University of Technology Sydney, IMPACCT - Improving<br>Palliative, Aged and Chronic Care through Clinical Research and<br>Translation |
| <b>Primary Subject<br>Heading</b>: | Palliative care                                                                                                                                                                                                                                                                                                                                                                                                                                        |
| Secondary Subject Heading:         | Oncology                                                                                                                                                                                                                                                                                                                                                                                                                                               |
| Keywords:                          | delirium, neoplasms, prevention, non-pharmacological, clinical trial,<br>PALLIATIVE CARE                                                                                                                                                                                                                                                                                                                                                               |
|                                    |                                                                                                                                                                                                                                                                                                                                                                                                                                                        |

SCHOLARONE™  
Manuscripts

## The PRESERVE pilot study

**Title:** Multicomponent non-pharmacological intervention to prevent delirium for hospitalised people with advanced cancer: study protocol for a phase II cluster randomised controlled trial

**Author**

Annmarie Hosie<sup>1</sup>  
 Jane Phillips<sup>1</sup>,  
 Lawrence Lam<sup>1</sup>  
 Slavica Kochovska<sup>1</sup>,  
 Beverly Noble<sup>1</sup>  
 Meg Brassil<sup>1</sup>  
 Susan Kurrle<sup>2</sup>  
 Anne Cumming<sup>3</sup>  
 Gideon A Caplan<sup>4,5</sup>  
 Richard Chye<sup>6</sup>  
 Brian Le<sup>7</sup>  
 E. Wesley Ely<sup>8</sup>  
 Peter G. Lawlor<sup>9</sup>  
 Shirley H. Bush<sup>9</sup>  
 Jan Maree Davis<sup>10</sup>  
 Melanie Lovell<sup>1,2,11</sup>  
 Linda Brown<sup>1</sup>  
 Belinda Fazekas<sup>1</sup>  
 Seong Leang Cheah<sup>1</sup>  
 Layla Edwards<sup>1</sup>  
 Meera Agar<sup>1</sup>

**Email**

annmarie.hosie@uts.edu.au  
 jane.phillips@uts.edu.au  
 lawrence.lam@uts.edu.au  
 slavica.kochovska@uts.edu.au  
 bev.noble@bigpond.com  
 meg.brassil@bigpond.com.au  
 susan.kurrle@sydney.edu.au  
 anne.cumming@safetyandquality.gov.au  
 gideon.caplan@health.nsw.gov.au  
 richard.chye@svha.org.au  
 brian.le@mh.org.au  
 wes.ely@vumc.org  
 plawlor@bruyere.org  
 sbush@bruyere.org  
 janmaree.davis@health.nsw.gov.au  
 mlovell@hammond.com.au  
 linda.brown@uts.edu.au  
 belinda.fazekas@uts.edu.au  
 seong.cheah@uts.edu.au  
 layla.edwards@uts.edu.au  
 meera.agar@uts.edu.au

**Institutions**

1. University of Technology Sydney, IMPACCT, Bld. 10, Level 3, 235-253 Jones St, Ultimo, Australia
2. University of Sydney, Northern Clinical School, Hornsby Ku-ring-gai Health Service, Hornsby, NSW 2077, Australia
3. Australian Commission on Safety and Quality in Health Care, Level 5, 255 Elizabeth St, Sydney, Australia
4. Prince of Wales Hospital, Geriatric Medicine, High Street, Randwick, NSW, 2035, Australia
5. University of New South Wales, Randwick, NSW, 2035, Australia
6. St Vincent's Hospital, Sacred Heart Health Service, Darlinghurst Road, Darlinghurst, NSW 2010, Australia
7. Royal Melbourne Hospital, Palliative and Supportive Services, 1 South West Grattan Street, Parkville, VIC 3050, Australia
8. Critical illness, Brain Dysfunction, and Survivorship (CIBS) Center at Vanderbilt University, and the Tennessee Valley Veteran's Affairs Geriatric Research Education Clinical Center (GRECC), Nashville TN USA
9. University of Ottawa, Department of Medicine, 43 Bruyère Street, Ottawa K1N 5C8, Canada
10. Calvary Health Care Kogarah Palliative Care, Rocky Point Road Kogarah NSW 2217, Australia
11. Greenwich Hospital, HammondCare, 97-115 River Rd, Greenwich, NSW 2065, Australia

**Corresponding Author**

Dr Annmarie Hosie  
 Phone: +61 2 9514 4404  
 Email: [annmarie.hosie@uts.edu.au](mailto:annmarie.hosie@uts.edu.au)

**Document details**

Number of tables: 1  
 Number of figures: 2  
 Number of references: 45  
 Word count: 3988

The PRESERVE pilot study

## Abstract

### Introduction

Delirium is a significant medical complication for hospitalised patients. Up to one-third of delirium episodes are preventable in older inpatients through non-pharmacological strategies that support essential human needs, such as physical and cognitive activity, sleep, hydration, vision and hearing. We hypothesized that a multicomponent intervention similarly may decrease delirium incidence, and/or its duration and severity, in inpatients with advanced cancer. Prior to a phase III trial, we aimed to determine if a multicomponent non-pharmacological delirium prevention intervention is feasible and acceptable for this specific inpatient group.

### Methods and analysis

The study is a phase II cluster randomised wait-listed controlled trial involving inpatients with advanced cancer at four Australian palliative care inpatient units. Intervention sites will introduce delirium screening, diagnostic assessment and a multicomponent delirium prevention intervention with six domains of care: preserving natural sleep; maintaining optimal vision and hearing; optimising hydration; promoting communication, orientation and cognition; optimising mobility; and promoting family partnership. Interdisciplinary teams will tailor intervention delivery to each site, and to patient need. Control sites will first introduce only delirium screening and diagnosis, later implementing the intervention, modified according to initial results. The primary outcome is adherence to the intervention during the first seven days of admission, as measured for 40 consecutively admitted eligible patients. Secondary outcomes relate to fidelity and feasibility, acceptability and sustainability of the study intervention, processes and measures in this patient population, using quantitative and qualitative measures. Delirium incidence and severity will be measured to inform power calculations for a future phase III trial.

1 The PRESERVE pilot study  
2

### 3 **Ethics and dissemination**

4 Ethical approval was obtained for all four sites. Trial results, qualitative sub-study findings,  
5 and implementation of the intervention will be submitted for publication in peer-reviewed  
6 journals, and reported at conferences, to study sites and key peak bodies.  
7  
8  
9

### 10 **Trial registration**

11 ACTRN12617001070325p  
12

### 13 **Key words**

14 Delirium, cancer, neoplasms, inpatients, palliative care, clinical trial, feasibility studies  
15  
16

### 17 **Strengths and limitations of this study**

- 18 • Strengths are the cluster RCT design; inclusion of patient and family perspectives;  
19 and sponsorship by the Palliative Care Clinical Trials Collaborative (PaCCSC), a  
20 national, multi-site clinical trials group which provides rigorous research governance.  
21
- 22 • A limitation is that site and research staff will not be blinded to the intervention.  
23
- 24 • The study is being conducted in Australian palliative care inpatient settings and will  
25 include only patients with advanced cancer, limiting the generalisability of results for  
26 other settings and people with other advanced illnesses.  
27  
28  
29  
30  
31  
32  
33  
34  
35  
36  
37  
38  
39  
40  
41  
42  
43  
44  
45  
46  
47  
48  
49  
50  
51  
52  
53  
54  
55  
56  
57  
58  
59  
60

The PRESERVE pilot study

## Introduction

Delirium is a serious acute neurocognitive disorder and medical complication for people with advanced cancer receiving palliative care in hospital, where it occurs for up to one in two patients and is reversible in only up to half of cases, at best.<sup>1-3</sup> It causes sudden disruption to attention and cognition, such as memory and language deficit, disorientation, and perception.<sup>1</sup> During delirium, feelings of fear, humiliation, confusion and isolation are common,<sup>4</sup> at a time when connection with family, friends and health professionals is important and highly valued.<sup>5</sup> Family experience high levels of distress as a result.<sup>5</sup> Delirium is further associated with increased falls, pressure areas, longer-term cognitive and functional decline, duration of hospital stay, mortality, and health care costs.<sup>6-8</sup>

Despite the incidence of delirium and its profound impacts on people with advanced illness, there are limited treatment options and, to date, no effective pharmacological intervention.<sup>9-11</sup> Nor have evidence-based processes for delirium prevention, recognition or assessment been translated in palliative care units.<sup>12,13</sup> The most effective strategy for delirium in older patients across a range of hospital settings is prevention through non-pharmacological strategies to meet essential needs, such as physical and cognitive activity, sleep, hydration, vision and hearing. When implemented as a 'multicomponent intervention', these strategies have reduced delirium incidence by one-third.<sup>9,14</sup> A meta-analysis (n=4,267) of randomised or matched trials of non-pharmacological prevention strategies reported significant reduction in delirium incidence, with the odds of delirium 53% lower in the intervention group compared with controls (odds ratio (OR) 0.47, 95% confidence interval (CI) 0.38-0.58, p<0.001).<sup>14</sup> A Cochrane Review of 39 randomised controlled trials (n=16,082) of non-pharmacological, medication or anaesthetic interventions reported that seven non-pharmacological intervention studies (n=1,950) reduced delirium incidence (relative risk (RR) 0.69, 95% CI 0.59 to 0.81), while evidence for most medication and anaesthetic

## The PRESERVE pilot study

1  
2  
3 interventions was uncertain.<sup>9</sup> There was moderate quality evidence that the non-  
4  
5 pharmacological interventions reduced length of hospital admission and improved the  
6  
7 likelihood of return to independent living, with low quality evidence of decreased delirium  
8  
9 duration and severity.<sup>9</sup> Studies of non-pharmacological interventions for delirium have  
10  
11 mainly focused on older patients, yet often excluded patients with advanced cancer and other  
12  
13 life-threatening illnesses.<sup>15</sup> Also, strategies within the interventions were diverse, some were  
14  
15 better operationalised than others, and not all used a randomised design.<sup>14</sup>  
16  
17  
18  
19

20  
21 The one study testing a non-pharmacological delirium prevention intervention in people with  
22  
23 advanced cancer (n=1,516) in seven Canadian specialist palliative care inpatient units  
24  
25 reported no statistically significant difference in delirium incidence, total days in delirium,  
26  
27 duration of first episode, severity or delirium-free survival.<sup>16</sup> Strategies were fewer and less  
28  
29 targeted to essential needs of patients than those reported in the more recent meta-analysis  
30  
31 and Cochrane review;<sup>9,14</sup> and included: i) orientating patients to time, person and place each  
32  
33 shift; ii) informing family about delirium, its symptoms and prevention of confusion; and iii)  
34  
35 assessing pharmacological risk factors for delirium before querying physicians about  
36  
37 consequent planned medication change. There also was inadequate rate and timeliness of  
38  
39 completion of the primary measure, the Confusion Assessment Method. While adherence to  
40  
41 the intervention was greater than 80%, there was no difference in overall use of psychoactive  
42  
43 medication between the two arms. Given that such medication is associated with  
44  
45 delirium,<sup>17,18</sup> this factor may partly explain the study's negative results.<sup>16</sup>  
46  
47  
48  
49

50  
51 There are possible barriers to implementation of non-pharmacological delirium prevention  
52  
53 strategies for people with advanced cancer. These include their common frailty and fatigue  
54  
55 which reduces capacity to participate in activities such as exercise. Patients and family may  
56  
57 not realise the serious risks associated with an episode of delirium, or prioritise prevention  
58  
59 strategies without this knowledge. Some clinicians may perceive that delirium is inevitable  
60

## The PRESERVE pilot study

and innocuous in advanced cancer and palliative care contexts;<sup>19,20</sup> and presume that preventing delirium is not possible, necessary or likely to be effective. Clinicians historically have relied on pharmacological intervention for delirium, rather than intentionally striving to prevent delirium through non-pharmacological means. With competing demands and without evidence of effectiveness, hospital managers may not value the importance of preventing delirium or allocate the required resources or personnel for non-pharmacological strategies, particularly for people approaching the end of their life.

Despite these barriers, the remit of palliative care to help patients live as actively as possible makes it important to study whether delirium can be prevented during advanced cancer.

Based on the body of research conducted with older people in hospital described above,<sup>9,14</sup> we hypothesised that a similar multicomponent intervention would reduce delirium incidence and/or decrease its duration and severity for this inpatient population. Given the above-noted possible barriers to implementation, piloting the intervention and study design was required prior to testing the hypothesis in a phase III (efficacy) trial.

### **Aim and objectives**

To determine if a multicomponent non-pharmacological delirium prevention intervention is feasible and acceptable for inpatients with advanced cancer.

The objectives are to:

1. To develop a multi-component non-pharmacological delirium prevention intervention ('non-pharmacological delirium prevention intervention'), derived from highly efficacious interventions for older adults in hospital, for people with advanced cancer and palliative care inpatient unit settings;
2. To describe the strategies used by participating sites to implement the delirium measurement tools and non-pharmacological delirium prevention intervention;

## The PRESERVE pilot study

3. To determine if a non-pharmacological delirium prevention intervention is feasible, acceptable and deliverable with high adherence and fidelity in oncology and palliative care units;

4. To determine the feasibility and design of a phase III trial to test the efficacy of the non-pharmacological delirium prevention intervention in people with advanced cancer in hospital.

## Methods and analysis

### Design

A phase II, cluster randomised controlled trial (RCT) with a waitlist control.<sup>21</sup> Participating sites will be randomised to the intervention (screening and immediate implementation of intervention) or control (screening and waitlist to the modified-intervention) (Figure 1).

The use of this design in the phase II trial was to inform the feasibility and design, delivery methods and power calculations of a future multi-site phase III cluster RCT. A cluster approach was chosen because the proposed intervention is more suited to implementation at a site level, and a traditional RCT design would risk contamination in the control arm. The use of a cluster RCT design is an advance on prior studies of non-pharmacological prevention interventions that used non-randomised designs. A waitlist control arm was chosen as key stakeholders at interested sites considered that the delirium prevention strategies were important, that participation in a trial that enabled access to the intervention was more appealing and ethically sound, and that the intervention strategies were well established as effective in other hospital settings and the potential benefits were clear, in principle. The waitlist control adds to the resource and time requirements of the trial, but will allow the intervention and study processes to be modified and/or refined at the two waitlist control sites, should initial results indicate that this is required.<sup>21</sup>



1 The PRESERVE pilot study

2  
3 **Sites (clusters) and patient population**

4  
5  
6 The participating sites are four Australian palliative care units, where approximately 75% of  
7  
8 patients have a primary diagnosis of advanced cancer.<sup>22</sup>

9  
10  
11 In line with the cluster RCT design, consent to participate was obtained at the site level from  
12  
13 the person with the delegation to approve participation. Data will be collected for all  
14  
15 admitted patients aged  $\geq 18$  years with a diagnosis of advanced cancer, for which no  
16  
17 individual patient consent will be required.  
18  
19

20  
21  
22 **Intervention**

23  
24 Intervention sites will implement i) delirium screening; ii) delirium diagnosis assessments;  
25  
26 and iii) the multicomponent delirium prevention intervention.  
27  
28

29  
30 Bedside nurses will undertake the Nursing Delirium Screening Scale (Nu-DESC)<sup>23</sup> for all  
31  
32 eligible patients at the end of every shift. Within 24 hours of the patient assessed as having a  
33  
34 Nu-DESC score  $\geq 2$ , a trained physician will apply Diagnostic and Statistical Manual of  
35  
36 Mental Disorders, Fifth edition (DSM-5) diagnostic criteria for delirium,<sup>1</sup> operationalised  
37  
38 using the Delirium Rating Scale-Revised-1998 (DRS-R-98).<sup>24</sup> These processes currently are  
39  
40 not routine at the participating sites and therefore will be additional to usual care.  
41  
42

43  
44 The multicomponent delirium prevention intervention involves five domains of care that,  
45  
46 when delivered in combination, significantly reduced delirium incidence in older hospitalised  
47  
48 patients in previous clinical trials.<sup>9,14</sup> We added family partnership as the sixth domain, as it  
49  
50 was recommended by our consumer investigators and an expert working group, is highly  
51  
52 valued by patients and family members,<sup>5,25</sup> and identified as essential by the Australian  
53  
54 Commission for Safety and Quality in Healthcare (ACSQHC) in a new Delirium Standard, if  
55  
56 preferred by the patient.<sup>26</sup> We did not include a pharmacological component (such as  
57  
58 minimising polypharmacy) because there was less evidence that this effectively prevents  
59  
60

1 The PRESERVE pilot study

2  
3 delirium, compared to that which addresses fundamental human needs for physical and  
4  
5 cognitive activity, sleep, hydration, vision and hearing. 9, 14  
6  
7

8  
9 The delirium prevention intervention will be delivered to all eligible patients for the first  
10  
11 seven days of admission by members of the interdisciplinary team, family caregivers and  
12  
13 volunteers. The domains and strategies of the multicomponent intervention are presented in  
14  
15 Table 1.  
16

17  
18 Control sites will initially implement only delirium screening and diagnosis. Once the  
19  
20 intervention sites achieve their sample, control sites will implement the intervention.  
21  
22

23  
24 All sites will continue usual care with respect to treatment of patients with delirium.  
25  
26  
27  
28  
29  
30  
31  
32  
33  
34  
35  
36  
37  
38  
39  
40  
41  
42  
43  
44  
45  
46  
47  
48  
49  
50  
51  
52  
53  
54  
55  
56  
57  
58  
59  
60

## The PRESERVE pilot study

**Table 1: Multicomponent delirium prevention intervention**

| Domain                                           | Strategies                                                                                                                                                                                                                                                                                                                                                                                                                                                                                                                                                                                           | Implementation                                                                                                                                                                                                                                                                                                                                                                                                                                          |
|--------------------------------------------------|------------------------------------------------------------------------------------------------------------------------------------------------------------------------------------------------------------------------------------------------------------------------------------------------------------------------------------------------------------------------------------------------------------------------------------------------------------------------------------------------------------------------------------------------------------------------------------------------------|---------------------------------------------------------------------------------------------------------------------------------------------------------------------------------------------------------------------------------------------------------------------------------------------------------------------------------------------------------------------------------------------------------------------------------------------------------|
| Preserve natural sleep                           | <ul style="list-style-type: none"> <li>• Offer ear plugs to patients with low risk of falls</li> <li>• Offer eye shades to patients with low risk of falls</li> <li>• Reduce noise outside patient rooms during 21:00-06:00</li> <li>• Normal day-night light variation in room and unit</li> <li>• Exposure to natural light during daylight hours</li> <li>• Schedule care activities to allow uninterrupted sleep during the night</li> <li>• Avoid caffeine after 4pm</li> </ul>                                                                                                                 | <ul style="list-style-type: none"> <li>• The patient wears ear plugs at night</li> <li>• The patient wear eye shades at night</li> <li>• Room curtains/blinds are open during the day</li> <li>• Room lights are off or minimised at night</li> <li>• The patient spends time outside during the day</li> <li>• The patient drinks no caffeinated drinks after 4pm</li> <li>• The patient reports uninterrupted night-time sleep</li> </ul>             |
| Maintain optimal sensory perception              | <ul style="list-style-type: none"> <li>• Assess hearing</li> <li>• Assist with and re-inforce use of hearing aids and special communication techniques</li> <li>• Ear wax clearing as needed</li> <li>• Assess need for visual aids (glasses, magnifying lenses)</li> <li>• If needed, ask family to provide for the patient;</li> <li>• Assist with and reinforce use of visual aids</li> </ul>                                                                                                                                                                                                     | <ul style="list-style-type: none"> <li>• The patient has their hearing assessed</li> <li>• The patient has ear wax cleaning</li> <li>• The patient wears functioning hearing aids</li> <li>• The patient has their vision assessed</li> <li>• The patient wears their glasses appropriately</li> <li>• The patient uses visual aids</li> </ul>                                                                                                          |
| Optimise hydration                               | <ul style="list-style-type: none"> <li>• Encourage oral fluids</li> <li>• Physical assistance with drinks and meals, as required</li> <li>• Drinking aids, as required</li> <li>• Be alert and respond to reversible causes of poor oral intake within 24 hours e.g. nausea, vomiting, drowsiness, sore mouth</li> </ul>                                                                                                                                                                                                                                                                             | <ul style="list-style-type: none"> <li>• The patient is encouraged to drink</li> <li>• The patient is assisted with meals</li> <li>• Drinking aids are provided e.g. straws</li> <li>• Intervention for reversible causes of poor oral intake are in place</li> </ul>                                                                                                                                                                                   |
| Promote communication, orientation and cognition | <ul style="list-style-type: none"> <li>• Interpreter and translation for people of non-English speaking background (NESB)</li> <li>• Greet the patient by name</li> <li>• Introduce self by name and role</li> <li>• Refer to person, time and place when talking with the patient</li> <li>• Time aids in room e.g. watch, personal or wall clock; wall, desk or electronic calendar</li> <li>• Update in-room whiteboards daily with date, day, place, reason for admission, team member names, schedule</li> <li>• Minimise number of transfers to other beds or rooms within the unit</li> </ul> | <ul style="list-style-type: none"> <li>• Interpreter is available and used</li> <li>• Orientating information is translated into the patient's native language</li> <li>• The patient can see the time, day, date and month in their room</li> <li>• The patient remains in the same bed location within the unit</li> <li>• The patient discusses current events</li> <li>• The patient reminisces and/or talks about their life and family</li> </ul> |

## The PRESERVE pilot study

|                    |                                                                                                                                                                                                                                                                                                                                                                                                                                                                                                                                                                                                                                                                                                                                                                                                                                                                                                                                                      |                                                                                                                                                                                                                                                                                                                                                                |
|--------------------|------------------------------------------------------------------------------------------------------------------------------------------------------------------------------------------------------------------------------------------------------------------------------------------------------------------------------------------------------------------------------------------------------------------------------------------------------------------------------------------------------------------------------------------------------------------------------------------------------------------------------------------------------------------------------------------------------------------------------------------------------------------------------------------------------------------------------------------------------------------------------------------------------------------------------------------------------|----------------------------------------------------------------------------------------------------------------------------------------------------------------------------------------------------------------------------------------------------------------------------------------------------------------------------------------------------------------|
|                    | <ul style="list-style-type: none"> <li>• Discuss current events with the patient</li> <li>• Encourage the patient to reminisce and talk</li> <li>• Encourage the patient to engage in cognitively stimulating activities</li> </ul>                                                                                                                                                                                                                                                                                                                                                                                                                                                                                                                                                                                                                                                                                                                  | <ul style="list-style-type: none"> <li>• The patient spends time in cognitively stimulating activities e.g. reading, puzzles, games, knitting, music</li> <li>• Cognitive stimulating activities are in the patient's care plan</li> </ul>                                                                                                                     |
| Optimise mobility  | <ul style="list-style-type: none"> <li>• Minimise use of tethers e.g. intravenous line, indwelling catheter, drain, oxygen</li> <li>• Minimise use of physical restraints e.g. bed rails, lock-in chair tables, vest restraints, limb restraints</li> <li>• Encourage and/or assist the patient to undertake physical activity throughout the day according to their capacity <ul style="list-style-type: none"> <li>○ Level 0: No activity planned (state reason),</li> <li>○ Level 1: Active range of movement exercises in bed and/or sitting position in bed e.g. regular bed adjustment, assistance with re-positioning</li> <li>○ Level 2: Assistance to sit on the side of the bed</li> <li>○ Level 3: Sitting out of bed in a chair, standing</li> <li>○ Level 4: Walking (marching in place, independent or assisted walking around room and unit)</li> <li>○ Level 5: Attend inpatient gym, walking outside of unit</li> </ul> </li> </ul> | <ul style="list-style-type: none"> <li>• The patient is free of tethers</li> <li>• The patient is free of physical restraint</li> <li>• The patient moves and/or exercises to their optimal capacity</li> </ul>                                                                                                                                                |
| Family partnership | <ul style="list-style-type: none"> <li>• Ask family about the patient's baseline cognition</li> <li>• Inform the patient and family about delirium risk</li> <li>• Inform the patient and family about delirium prevention strategies and invite participation</li> </ul>                                                                                                                                                                                                                                                                                                                                                                                                                                                                                                                                                                                                                                                                            | <ul style="list-style-type: none"> <li>• Family are asked about the patient's baseline cognition on admission</li> <li>• Delirium information brochure is provided to the patient and family</li> <li>• Verbally inform of delirium risk and prevention</li> <li>• Patients and family are invited to participate in delirium prevention strategies</li> </ul> |

1 The PRESERVE pilot study  
2  
3

#### 4 **Site engagement, education and training** 5

6 The phase II trial will not pre-determine delivery methods for the intervention, instead  
7  
8 observing the methods of each site in order to learn from each team about their established  
9  
10 practice, as well as what practices they needed to establish. Engagement of site staff and  
11  
12 volunteers will be guided by Michie's Behaviour Change Wheel (BCW), an evidenced-based  
13  
14 framework for changing health-related behaviours.<sup>27</sup> Each site will form an interdisciplinary  
15  
16 working group of medical, nursing, allied health, pastoral care, volunteer coordinator and  
17  
18 managerial staff. The function of the working groups will be to determine how to deliver the  
19  
20 intervention with the available resources, composition and capabilities of their site team.<sup>27</sup>  
21  
22 Working group members will communicate the study to the whole team, promote the  
23  
24 delirium screening, diagnosis and prevention strategies, and inform patients and family about  
25  
26 delirium and the prevention strategies. Site teams will be encouraged to tailor the  
27  
28 intervention strategies to each patient's assessed needs and preferences to ensure person-  
29  
30 centred care, as well as to adopt simple and feasible methods of delivery and documentation  
31  
32 of the intervention.  
33  
34  
35  
36  
37  
38  
39

40 Education and training of site staff and volunteers in the delirium screening and prevention  
41  
42 strategies will be standardised, interdisciplinary and based on Biggs' educational model.<sup>28,29</sup>  
43  
44 This model will align educational objectives and methods with the delirium learning needs of  
45  
46 staff, and promote critical reflection on attitudes, practice and functional knowledge of the  
47  
48 complexities of caring for a person with advanced cancer in hospital.<sup>28,29</sup> Education and  
49  
50 training will take place for two-months prior to data collection. A brief, simple study  
51  
52 overview manual also will be developed.  
53  
54  
55

56 Study investigators and/or project staff will attend sites to: i) promote fidelity to the study  
57  
58 processes and aims; ii) assist with education and training activities; iii) resolve issues that  
59  
60 delay implementation of the intervention or threaten its integrity; iv) act as a 'delirium

1 The PRESERVE pilot study

2  
3 resource person'; and v) support and encourage site staff and volunteer participation in the  
4  
5 intervention.  
6  
7

8  
9 The frequency, duration and mode of administration of education and training will be  
10  
11 determined prior to implementing delirium screening, diagnosis and prevention strategies in  
12  
13 collaboration with participating sites, then standardised for each. Based on the learnings  
14  
15 obtained in this phase II trial, we will develop a replicable standardised education resource  
16  
17 for the phase III trial.  
18  
19

### 20 **Randomisation**

21  
22  
23 Randomisation of sites will take place after Human Research Ethics Committee (HREC) and  
24  
25 local governance approvals are obtained. In keeping with the method of the anticipated phase  
26  
27 III trial, we will use a permuted block randomisation method with various block sizes to  
28  
29 allocate sites to the intervention or waitlist control. Randomisation will be performed by the  
30  
31 study statistician (LL) from the coordinating centre, the University of Technology Sydney  
32  
33 (UTS).  
34  
35  
36  
37

### 38 **Blinding and avoidance of contamination**

39  
40  
41 The study design and nature of the intervention means that blinding of site staff will not be  
42  
43 possible. Written information for patients and family caregivers will provide only general  
44  
45 information about the study aims, rather than specifics of the design or site allocation.  
46  
47

48 Attention will be focused on research nurse training and standardisation of data collection to  
49  
50 limit the potential for bias.  
51  
52

53 To avoid contamination between sites, personnel collecting data at an intervention site will  
54  
55 not collect data in a control site, and vice versa. Site investigators, research nurses and  
56  
57 project staff will be asked not to discuss the intervention in joint tele-meetings with control  
58  
59 sites. Clinicians at control sites initially will receive information and training on delirium  
60

## The PRESERVE pilot study

screening and diagnosis only, and only general information about the prevention intervention in discussions and promotion, until they move into the intervention phase.

### **Data collection**

Research nurses will collect baseline data from sites' most recent Palliative Care Outcomes Collaborative (PCOC) report (a national program which measures and benchmarks patient outcomes in palliative care using standardised clinical assessment tools)<sup>23</sup> (Figure 2) and from key personnel. Research nurses will screen consecutively admitted patients for eligibility, collect delirium screening and diagnostic assessment measures for enrolled patients and record these in a Case Report Form (CRF). At intervention sites, specially designed checklists will capture family caregivers, staff and volunteers' delivery (or otherwise) of delirium prevention strategies within each domain of the multicomponent intervention (Table 1), as well as who delivered it. From this, we will determine the level of involvement of family caregivers, interdisciplinary staff, and volunteers for each strategy and domain. Whenever the patient does not receive the strategy, the reason will be recorded according to the following categories:

- Not required
- Patient choice
- Not clinically appropriate
- Not possible with current resources
- Other

At study completion, the project team will collect PCOC data for the study time-frame (Age, Gender, Country of birth, Preferred language, Aboriginal or Torres Strait Islander status, Primary diagnosis, Length of stay, Performance status [Australian-modified Karnofsky Performance Status (AKPS)]<sup>30</sup> and Resource Utilisation Groups - Activities of Daily Living

1 The PRESERVE pilot study

2  
3 (RUG-ADL)],<sup>31</sup> Palliative care phase).<sup>32</sup> For the sustainability outcome, site research nurses  
4 will collect intervention adherence data at six months for all inpatients for one week.  
5  
6  
7

### 8 **Assessments**

9  
10  
11 Figure 2 gives the schedule of study measures and time points; Text Box 1 provides  
12 information on the palliative care and delirium measures.  
13  
14  
15  
16  
17  
18  
19  
20  
21  
22  
23  
24  
25  
26  
27  
28  
29  
30  
31  
32  
33  
34  
35  
36  
37  
38  
39  
40  
41  
42  
43  
44  
45  
46  
47  
48  
49  
50  
51  
52  
53  
54  
55  
56  
57  
58  
59  
60

For peer review only



## The PRESERVE pilot study

**Text Box 1: Description of study measures**

The **Australian-modified Karnofsky Performance Status (AKPS)** was adapted from the Karnofsky Performance Status with good face validity and longitudinal test-retest reliability.<sup>30</sup> The AKPS measures patients' overall performance status, using 10-point increments along a scale of 100-10. A score of 100 denotes normal function with no evidence of disease, decreasing to a minimum score of 10, assigned when patients are comatose or barely rousable. Routinely applied on an at least daily basis in most Australian inpatient unit palliative care services. The AKPS will be used to report the patient cohort's performance status at participating sites.

The **Resource Utilisation Groups - Activities of Daily Living (RUG-ADL)**<sup>31</sup> is a validated functional assessment tool which assigns a score of 4-18, based on what a patient does in relation to bed mobility, transfers, eating and toileting, rather than they can do. Higher scores indicate the need for more assistance to undertake activities and that more resources are required to provide this assistance. Applied on an at least daily basis in most Australian inpatient unit palliative care services. The measure will be used to report the patient cohort's functional status at participating sites.

The **Palliative Care Phase**<sup>32</sup> classification is not a validated tool, but is applied on an at least daily basis in most Australian palliative care services to describe the needs of the patient and family and prompt a timely and appropriate clinical response. Phases are: 1. Stable (problems and symptoms are adequately managed and there is a plan of care); 2. Unstable (urgent intervention required because a new symptom or problem develops, or an existing problem rapidly escalates); 3. Deteriorating (a gradual decline in function AND worsening of an existing problem or development of a new but anticipated problem); 4. Terminal (death is likely within days); and 5. Bereavement (post death support). The measure will be used to report the patient cohort's palliative care needs at participating sites.

The **Nursing Delirium Screening Scale (Nu-DESC)**<sup>24</sup> was validated in an oncology inpatient population with a sensitivity of 85.7% and specificity of 86.8%.<sup>24</sup> It is a brief (less than one minute) five-item and low burden tool, incorporating nurses' observation of disorientation, inappropriate behavior, inappropriate communication, illusions/hallucinations and psychomotor retardation. Nurses assign a score of 0–2 for each item, giving a maximum score of 10. The psychomotor retardation item improves recognition of hypoactive delirium,<sup>33</sup> the most prevalent subtype in palliative care inpatient populations.<sup>3</sup> The Nu-DESC has been used in previous research in inpatient palliative care populations<sup>11</sup> and was considered feasible and acceptable by palliative care nurses.<sup>19</sup> The Nu-DESC will be used by bedside nurses to screen patients for delirium every eight-hour shift.

## The PRESERVE pilot study

The **DSM-5 diagnostic criteria for delirium** are within the most current version of the American Psychiatric Association: Diagnostic and Statistical Manual of Mental Disorders.<sup>1</sup> Criteria are: A. Disturbed attention and awareness; B. Disturbance developed over a short period of time (usually hours to a few days), is a change from baseline attention and awareness, and fluctuates in severity; C. An additional disturbance in cognition; D. Disturbances in A and C are not caused by another neurocognitive disorder nor occur in the context of severely reduced level of arousal; and E. The disturbance is a direct physiological consequence of another medical condition, substance intoxication or withdrawal, exposure to a toxin, or has multiple aetiologies. Treating physicians will use the DSM-5 to determine a delirium diagnosis.

The **Delirium Rating Scale-Revised-98 (DRS-R-98)**<sup>25</sup> is a 16-item delirium severity and diagnostic scale with scores of up to 46. It had high inter-rater reliability, sensitivity and specificity in the original validation study,<sup>25</sup> high sensitivity and adequate internal consistency and factor validity in cancer patients,<sup>34</sup> and has been used in research with palliative care inpatients.<sup>35,36</sup> The DRS-R-98 was designed to measure a wider range of delirium symptoms than are contained within diagnostic criteria and in different settings had good discriminative capacity for all, including in a patient population with a high prevalence of dementia<sup>37,38</sup>. Severity items are: sleep-wake cycle disturbance; perceptual disturbances and hallucinations; delusions; lability of affect; language; thought process abnormalities; motor agitation; motor retardation; orientation; attention; short-term memory; long-term memory; visuospatial ability. Diagnostic items are temporal onset of symptoms; fluctuation of symptom severity; physical disorder. Information is obtained from all sources, including physical examination, history gathering and formal cognitive testing. Requires clinician training, with guidance for use contained within the tool. Trained treating physicians and nurses will use the DRS-R-98 to operationalize delirium diagnosis and measure delirium severity. We will use a diagnostic cut-off score of  $\geq 15$ .<sup>38</sup>

## The PRESERVE pilot study

### Outcomes

The primary outcome is adherence to the intervention. A rate of at least 60% of patients having at least four completed domains for at least five of the first seven days of admission will be considered minimum evidence that the intervention is feasible without need for major modification of the intervention or its delivery methods. Endpoints will be at completion of the intervention and modified-intervention arms (Figure 1).

We chose this moderate endpoint because of the potential patient, clinician and system level challenges to the non-pharmacological strategies in the context of advanced cancer.

Consensus by investigators was this endpoint would be the minimum to still have impact, realistic to achieve in practice, and ensure that further evaluation of this complex intervention was not prematurely stopped. The waitlist control design will allow two endpoints and thereby maximize the potential to reach this level of adherence to the intervention.

Secondary outcomes will further inform of the feasibility, acceptability and potential efficacy of a phase III trial of the intervention in this patient population and setting, as follows:

1. Coverage: delivery rate of the multicomponent intervention to consecutive eligible patients admitted to the unit, reasons why the intervention was not delivered, weekend coverage, measured via screening logs and case report forms;
2. Fidelity to delirium screening, diagnosis and the intervention: degree of alignment with the protocol, rationales for adaptation, rate of protocol deviations without reasons, measured via case report forms;
3. Methods, areas and levels of interdisciplinary involvement in delivery of the intervention, measured via intervention checklist;
4. Feasibility and acceptability of the study intervention and measures for patients, caregivers, staff and volunteers, measured via brief interviews during and shortly after the intervention phase;

## The PRESERVE pilot study

5. Sustainability of the intervention: Adherence will be measured for all inpatients over one week, six months after commencement of data collection at the intervention sites;
6. Feasibility of the sample: percentage of participants included in data collection, reasons for non-inclusion, time to achieve sample size, measured via screening logs and case report forms;
7. Number of people with advanced breast cancer admitted to the units, number of these who are in underserved populations (patients over 70, indigenous patients, and culturally and linguistically diverse backgrounds), and the number who experience an episode of delirium (total, and in under-served populations) (for the purposes of reporting to the trial funder, the National Breast Cancer Foundation);
8. Percentage completion of all study measures, measured via case report form;
9. Rate of patients with a positive delirium screen, measured according to a score of 2 or more on the Nu-DESC at least once during each 24-hour period;
10. Delirium incidence, measured at first onset according to the DSM-5 diagnostic criteria for delirium applied within 24-hours of a positive delirium screen;
11. Delirium severity measured at first onset, using the DRS-R-98; and
12. Number of falls, complaints and other adverse events related to the intervention.

### **Sub-study**

A qualitative sub-study will be conducted to obtain patient, family caregiver, staff and volunteer perceptions of the feasibility and acceptability of the intervention strategies (e.g. receiving information from staff about delirium) and study measures via brief, semi-structured interviews (Figure 2).

### *Inclusion and exclusion criteria for the sub-study*

1. **Patients** will be included if they are aged 18 years or older; have a diagnosis of advanced cancer; admitted to an intervention site and received the intervention; speak English or have access to a health care interpreter; and able to give fully informed

## The PRESERVE pilot study

written consent. Patients with advanced breast cancer will be purposively recruited to participate in the interviews. Patients will be excluded if they have an AKPS<sup>30</sup> score less than 30 and are in the 'terminal' Palliative Care Phase;<sup>32</sup>

2. **Family caregivers** will be included if they are aged 18 years or older; identified as a caregiver of a patient who received the intervention; English speaking or have availability of a health care interpreter; and able to give fully informed written consent;
3. **Site staff** will be included if they are employed at an intervention site and involved in implementing the delirium measures and/or the intervention; and
4. **Site volunteers** will be included if they are aged 18 years or older, enrolled in a formal volunteer program at an intervention site and involved in implementing the intervention.

### *Sub-study consent process*

A researcher who is not a study investigator will obtain written informed consent from patients, family caregivers, staff and volunteers to participate in the brief interviews. For patients and family caregivers, the researcher will check with the clinical team to make sure the person meets the broad criteria for consideration of eligibility, is well enough and has given permission to be approached by a researcher, before introducing him or herself to the person and explaining the study. For staff and volunteers, the researcher will consult with the site investigator before approaching potential participants.

Participant consent will be a process of information exchange between the researcher, the potential participant and any other person the potential participant believes should be included in the discussion. Participant information sheets will be the basis for discussion and cover all procedures and possible benefits and burdens of participating. The potential participant will be given sufficient opportunity to consider the study and ask questions. Any

1 The PRESERVE pilot study

2  
3 questions will be addressed and answered fully. The completed consent form will be copied  
4  
5 and one copy will be given to the participant, one copy inserted in the medical file (for  
6  
7 patients), and one copy filed in study file.  
8  
9

## 10 **Analysis**

### 11 *Statistical analysis of primary outcome (adherence)*

12  
13  
14 Adherence will be calculated as the rate to which patients have completed domains on a daily  
15  
16 basis for the first seven days of admission. Degree of adherence to individual strategies will  
17  
18 also be calculated as proportions.  
19  
20  
21  
22

### 23 *Statistical analysis of secondary outcomes*

24  
25 Data on all outcomes will be summarised with descriptive statistics including their  
26  
27 distribution. Frequency and percentage will be used for summarising categorical variables  
28  
29 and mean, standard deviation, median, and interquartile range for continuous variables.  
30  
31  
32

33  
34 Delirium incidence and severity will be determined at both the intervention and control sites.  
35  
36

### 37 *Qualitative analysis*

38  
39 Participant interviews will be analysed using thematic content analysis to identify emergent  
40  
41 themes and trends related to participants' perceptions of the feasibility and acceptability of  
42  
43 the intervention elements and delirium measures.<sup>39</sup>  
44  
45  
46  
47

### 48 *Sample size*

49  
50 A sample size of four sites and 40 patient participants (10 from each site) was considered  
51  
52 sufficient for reasonable estimation of feasibility and percentage completion of study  
53  
54 processes and measures during the first phase.<sup>40</sup> We will collect de-identified data on all  
55  
56 eligible patients admitted to all sites until data is collected for 40 patients overall, with at  
57  
58  
59  
60

## The PRESERVE pilot study

least 20 in the intervention arm. If the intervention is found to need modification, data will be collected for a further 20 patient participants at the two waitlist control sites.

This sample size was based on that projected for the future phase III cluster RCT of the intervention with: two parallel arms, 50% delirium incidence in the control, 30% delirium incidence in the intervention group, cluster size of 30 and intra-class correlation of 0.05, type I error rate of 5%, 80% power to reject the null hypothesis, and 30% attrition. This calculation results in a projected phase III trial sample size of nine clusters and 280 patient participants.

For the sub-study, sample size will be determined when data saturation is achieved.

### **Trial monitoring**

In addition to falls and complaints, all adverse events will be recorded. Site investigators will assess the adverse event, assign the degree of relationship to the intervention, and provide information to the coordinating centre (UTS), and the approving HREC if required. Adverse events will be followed until the event is resolved, can be explained, or if the participant is lost to follow-up. Reports will contain details of follow-up investigations, results or other consultation. The investigator team will stop the study if reporting of adverse events indicates that major review of the study protocol is required. The UTS project team will report adverse event related to the intervention to the PaCCSC Trial Management Committee (TMC) within two weeks of knowledge of the event. The TMC discussions will be minuted, with actions detailed and reviewed at the subsequent meeting. The TMC chairperson's report to the PaCCSC Scientific Committee will contain a summary of the discussions of the adverse event report and agreed outcomes.

### **Data management**

An Excel spreadsheet master index will contain confidential participant contact information and be the only link between individual site and patient participants and their allocated

## The PRESERVE pilot study

1  
2  
3 identification number (ID). Study data will be collected and stored on paper CRFs and  
4  
5 electronic Excel spreadsheets and then entered onto and managed on a Research Electronic  
6  
7 Data Capture (REDCap) <sup>41</sup> database. Audio data from participant interviews will be  
8  
9 identified only by ID, collected on a digital recording medium and stored temporarily at the  
10  
11 study sites until uploaded to the REDCap database. Original files will then be destroyed.  
12  
13 Data will be held, administered, checked and analysed at the coordinating site according to  
14  
15 relevant PaCCSC Standard Operating Procedures (SOP). Errors detected during the data  
16  
17 checking process will generate a site data report form recording details of the query and  
18  
19 correction and resolution instructions. The database will be updated according to site  
20  
21 instructions via email to provide an audit trail of data changes. The coordinating site will  
22  
23 maintain a register of data checks for monitoring purposes. Data collected at each site, such  
24  
25 as CRFs, any corrected and amended data, copies of adverse incident reports and file notes,  
26  
27 will be securely stored and identified by ID number only. All identifiable data (e.g. signed  
28  
29 consent forms) will be separately stored during the recruitment period. Site research staff  
30  
31 will send copies of study documents (with the exception of signed consent forms) to the  
32  
33 coordinating site by registered mail for collation and archiving. All study documents will be  
34  
35 stored in accordance with relevant State government regulations regarding the retention and  
36  
37 disposal of participant records.  
38  
39  
40  
41  
42  
43  
44

### **Patient and Public Involvement**

45  
46 The study rationale and processes were informed by the literature pertaining to patients'  
47  
48 experiences of delirium, as outlined in the introduction.<sup>4,5</sup> Low-burden outcome measures,  
49  
50 such as the Nursing Delirium Screening Scale, were deliberately chosen in order to minimise  
51  
52 the impact of the study on patients with advanced illness. No patients were directly involved  
53  
54 in the design, recruitment to or conduct of the study. Two family caregiver consumers are  
55  
56 associate investigators of the study (MB and BN). We will include the perspectives of  
57  
58 patients about the feasibility and acceptability of the intervention through brief semi-  
59  
60



## The PRESERVE pilot study

structured interviews. Investigators will not have access to the names or contact information of patient or family caregiver participants in order to directly provide feedback about the study to them. At study completion, a written and verbal report of the results and findings will be provided to the participating sites.

## Ethics and dissemination

The study was approved by the South Western Sydney Local Health District HREC on July 19, 2017, reference number HREC/17/LPOOL/224; and ratified by the UTS HREC on August 22, 2017, reference number ETH17-1697. Minor protocol amendments were approved on April 13, 2018 (V1.1).

Reporting of this protocol adheres to the Standard Protocol Items: Recommended for Interventional Trials.<sup>42</sup> Reporting of results will adhere to the Consolidated Standards of Reporting Trials (CONSORT) guidelines for cluster RCTs and non-pharmacological treatment trials.<sup>43,44</sup> Reporting of the qualitative sub-study and implementation findings will be guided by the Consolidated Criteria for Reporting Qualitative Research (COREQ).<sup>45</sup> A comprehensive dissemination strategy will ensure that the trial results (either positive or negative) inform future research and clinical practice. Dissemination will include publication in peer-reviewed journals, presentations at conferences, study sites and key peak bodies. The investigators have no publication restrictions.

## Strengths and limitations

The primary strengths of this study are the cluster RCT design and that it is supported by the PaCCSC, a national, multi-site phase III clinical trials group which provides well-established rigorous research governance and access to sites with research experience and capacity. The intervention includes family partnership, which is highly valued by both patients and family.<sup>5,26</sup> We will obtain the perspectives of patients and family, which are largely absent in trials of previous multicomponent delirium interventions.<sup>15</sup>

1 The PRESERVE pilot study

2  
3 Limitations include that site and research staff will not be blinded to the intervention. Active  
4 steps will be taken to minimize contamination between intervention and waitlist control sites.  
5  
6 The study will be conducted in Australian palliative care inpatient settings and include only  
7  
8 patients with advanced cancer, limiting the generalizability of results for services in other  
9  
10 geographical regions and health care systems, and for patients with other advanced illnesses.  
11  
12  
13  
14

## 15 **Trial status**

16  
17  
18  
19 The study has been approved by local health district and university HRECs, local governance  
20 approvals obtained, sites randomised, the two-month period completed and data collection is  
21  
22 underway.  
23  
24  
25

## 26 **List of abbreviations**

27  
28  
29  
30 **AKPS**: Australia-modified Karnofsky Performance Status; **ACSQHC**: Australian  
31 Commission for Safety and Quality in Health Care; **BCW**: Behaviour Change Wheel; **CI**:  
32 Confidence Interval; **CONSORT**: Consolidated Standards of Reporting Trials; **COREQ**:  
33 Consolidated Criteria for Reporting Qualitative Research; **DRS-R-98**: Delirium Rating  
34 Scale-Revised-1998; **DSM-5**: Diagnostic and Statistical Manual of Mental Disorders, Fifth  
35 edition; **HREC**: Human Research Ethics Committee; **ID**: identification number; **Nu-DESC**:  
36 Nursing Delirium Screening Scale; **OR**: Odds Ratio; **PaCCSC**: Palliative Care Clinical  
37 Studies Collaborative; **PCOC**: Palliative Care Outcomes Collaborative; **RCT**: Randomised  
38 Controlled Trial; **REDCap**: Research Electronic Data Capture; **RR**: Relative Risk; **RUG-**  
39 **ADL**: Resource Utilisation Groups - Activities of Daily Living; **SOP**: Standard Operating  
40 Procedures; **UTS**: University of Technology Sydney  
41  
42  
43  
44  
45  
46  
47  
48  
49  
50  
51  
52  
53  
54  
55  
56  
57  
58  
59  
60

1 The PRESERVE pilot study  
2  
3

## 4 **Declarations**

### 5 *Clinical trials registration*

6 ACTRN12617001070325p, Australian New Zealand Clinical Trials Registry (ANZTR),  
7 <http://www.anzctr.org.au/>, 24/07/2017. The ANZTR is a Primary Registry of the World  
8 Health Organization International Clinical Trials Registry Platform (WHO ICTRP).  
9  
10  
11  
12  
13  
14

### 15 *Consent for publication*

16 Participant information includes an explanation that results will be published in a form that  
17 maintains the confidentiality of sites and individual participants.  
18  
19  
20  
21

### 22 *Availability of data and material*

23 Participant information sheets and consent forms are available at

24 <https://www.anzctr.org.au/Trial/Registration/TrialReview.aspx?id=373168&isReview=true>  
25  
26  
27  
28  
29

### 30 *Funding*

31 This work was supported by an Australian National Breast Cancer Foundation (NBCF) 2017  
32 Pilot Study Grant (Grant code PS-17-030), contact details Level 9, 10 Barrack Street,  
33 Sydney, NSW 2000, Australia; T: +61 2 8098 4800 E: [info@nbcf.org.au](mailto:info@nbcf.org.au), W:  
34 <https://nbcf.org.au/>.  
35  
36  
37  
38  
39  
40

### 41 *Competing interests*

42 The authors declare that they have no competing interests.  
43  
44  
45  
46

### 47 *Sponsor*

48 The trial sponsor is PaCCSC, contact details: Level 3, 235 Jones St Ultimo NSW 2007,  
49 Australia; T. +61 (2) 9514 4862 (Sydney) /+61 (8) 7421 9726 (Adelaide),  
50 E: [paccsc@uts.edu.au](mailto:paccsc@uts.edu.au), W: [uts.edu.au/paccsc](http://uts.edu.au/paccsc). PaCCSC supports optimal trial governance  
51 through SOPs for electronic data handling, completion of CRFs, monitoring, dissemination,  
52 archiving of research materials, and record destruction; and trial infrastructure through Trials  
53 Management and Scientific Committees.  
54  
55  
56  
57  
58  
59  
60

1 The PRESERVE pilot study

2  
3 *Roles and responsibilities*

4  
5 Chief study investigators MA, AH and JP retain ultimate responsibility for the trial.

6  
7 Investigators and a project team coordinated the trial from IMPACCT - Improving Palliative,  
8 Aged and Chronic Care through Clinical Research and Translation, UTS. The investigator  
9 team meet at least twice yearly to support progress of the trial and inform related activities,  
10 such as dissemination.  
11  
12  
13  
14  
15

16  
17 **Authors' contributions**

18  
19 AH, MA and JP are the co-lead authors and AH is the corresponding author for this  
20 manuscript. MA, JP and AH devised the adaptation of the multicomponent intervention for  
21 people with advanced cancer in hospital. MB and BN provided consumer insight into the  
22 adaptation of the intervention. AC provided guidance on the extent of alignment of the  
23 intervention and delirium screening diagnosis processes with the ACSQHC Delirium Clinical  
24 Care Standard. LL devised the statistical analysis and randomization process. JMD and ML  
25 provided insights into the waitlist design. SK contributed to the development of the site  
26 engagement and educational processes. SK, GC, RC, BL, EWE, PL and SB contributed  
27 clinical and research expertise into study design, process, measures and/or analysis. LB, BF,  
28 SLC and LE contributed to various aspects of the study protocol, including data collection,  
29 entry and storage, reporting of adverse effects, minimization of contamination, and/or site  
30 training. All authors have read and approved the final manuscript.  
31  
32  
33  
34  
35  
36  
37  
38  
39  
40  
41  
42  
43  
44  
45  
46  
47

48 **Acknowledgements**

49 The authors gratefully acknowledge Associate Professor Andrew Teodorczuk, Dr Aileen  
50 Collier, Ms Bronwyn Heron and Dr Christine Sanderson who contributed clinical and  
51 research expertise to the development of the non-pharmacological delirium prevention  
52 intervention.  
53  
54  
55  
56  
57  
58  
59  
60

## The PRESERVE pilot study

## References

1. American Psychiatric Association. *Diagnostic and Statistical Manual of Mental Disorders, Fifth Edition (DSM-5)*. Arlington, VA: American Psychiatric Publisher; 2013.
2. Lawlor PG, Gagnon B, Mancini IL, et al. Occurrence, causes, and outcome of delirium in patients with advanced cancer: a prospective study. *Archives of Internal Medicine*. 2000;160(6):786-794.
3. Hosie A, Davidson PM, Agar M, Sanderson CR, Phillips J. Delirium prevalence, incidence, and implications for screening in specialist palliative care inpatient settings: A systematic review. *Palliative Medicine*. 2013;27(6):486-498.
4. O'Malley G, Leonard M, Meagher D, O'Keeffe ST. The delirium experience: a review. *Journal of Psychosomatic Research*. 2008;65(3):223-228.
5. Finucane AM, Lugton J, Kennedy C, Spiller JA. The experiences of caregivers of patients with delirium, and their role in its management in palliative care settings: an integrative literature review. *Psycho-Oncology*. 2017;26(3):291-300.
6. National Institute for Health and Clinical Excellence (NICE) National Clinical Guideline centre. Delirium: diagnosis, prevention and management. 2010; <http://www.nice.org.uk/nicemedia/live/13060/49908/49908.pdf>. Accessed July 13th, 2011.
7. Australian Commission on Safety and Quality in Health Care. Evidence for the safety and care of patients with a cognitive impairment in acute care settings: a rapid review. In. Sydney: ACSQHC; 2013.
8. Leslie DL, Marcantonio ER, Zhang Y, Leo-Summers L, Inouye SK. One-year health care costs associated with delirium in the elderly population. *Archives Internal Medicine*. 2008;168(1):27-32.
9. Siddiqi N, Harrison JK, Clegg A, et al. Interventions for preventing delirium in hospitalised non-ICU patients. *Cochrane Database of Systematic Reviews*. 2016(Issue 3. Art. No.: CD005563. ).
10. Neufeld KJ, Yue J, Robinson TN, Inouye SK, Needham DM. Antipsychotic Medication for Prevention and Treatment of Delirium in Hospitalized Adults: A Systematic Review and Meta-Analysis. *Journal of the American Geriatric Society*. 2016;64(4):705-714.
11. Agar M, Lawlor PG, Quinn S, et al. Efficacy of oral risperidone, haloperidol, or placebo for symptoms of delirium among patients in palliative care: A randomised clinical trial. *JAMA Internal Medicine*. 2017;177(1):34-42.
12. Lawlor PG, Davis DHJ, Ansari M, et al. An Analytic Framework for Delirium Research in Palliative Care Settings: Integrated Epidemiological, Clinician-Researcher and Knowledge User Perspectives. *Journal of Pain and Symptom Management*. 2014;48(2):159-175.
13. Hosie A, Agar M, Lobb E, Davidson PM, Phillips J. Improving delirium recognition and assessment for people receiving inpatient palliative care: a mixed methods meta-synthesis. *International Journal of Nursing Studies*. 2017;75:123-129.
14. Hshieh TT, Yue J, Oh E, et al. Effectiveness of multicomponent nonpharmacological delirium interventions: a meta-analysis. *JAMA Internal Medicine*. 2015;175(4):512-520.
15. Hosie A, Amgarth-Duff I, Edwards L, et al. Non-pharmacological delirium interventions for adult inpatients with advanced, progressive illness: a systematic review. American Delirium Society 7th Annual Meeting; 2017; Nashville, TN.

## The PRESERVE pilot study

16. Gagnon P, Allard P, Gagnon B, Mérette C, Tardif F. Delirium prevention in terminal cancer: assessment of a multicomponent intervention. *Psycho-Oncology*. 2012;21(2):187-194.
17. Lonergan E, Luxenberg J, Areosa Sastre A. Benzodiazepines for delirium. *Cochrane Database of Systematic Reviews*. 2009(4).  
<http://www.mrw.interscience.wiley.com/cochrane/clsysrev/articles/CD006379/frame.html>.
18. Caraceni A. Drug-associated delirium in cancer patients. *European Journal of Cancer Supplements*. 2013;11(2):233-240.
19. Hosie A, Lobb E, Agar M, Davidson PM, Chye R, Phillips J. Nurse perceptions of the Nursing Delirium Screening Scale in two palliative care inpatient units: a focus group study. *Journal of Clinical Nursing*. 2015;24(22-22):3276-3285.
20. Wright DK, Brajtman S, Cragg B, Macdonald ME. Delirium as letting go: An ethnographic analysis of hospice care and family moral experience. *Palliative Medicine*. 2015;29(10):959-966.
21. Higginson IJ, Booth S. The randomised fast-track trial in palliative care: role, utility and ethics in the evaluation of interventions in palliative care? *Palliative Medicine*. 2011;25(8):741-747.
22. Palliative Care Outcomes Collaborative. 2017; <http://www.pcoc.org.au/>. August 20, 2018.
23. Gaudreau JD, Gagnon P, Harel F, Tremblay A, Roy MA. Fast, systematic, and continuous delirium assessment in hospitalized patients: the nursing delirium screening scale. *Journal of Pain and Symptom Management*. 2005;29(4):368-375.
24. Trzepacz PT, Mittal D, Torres R, Canary K, Norton J, Jimerson N. Validation of the Delirium Rating Scale-revised-98: comparison with the delirium rating scale and the cognitive test for delirium.[erratum appears in J Neuropsychiatry Clin Neurosci 2001 Summer;13(3):433]. *Journal of Neuropsychiatry & Clinical Neurosciences*. 2001;13(2):229-242.
25. Virdun C, Luckett T, Davidson PM, Phillips J. Dying in the hospital setting: A systematic review of quantitative studies identifying the elements of end-of-life care that patients and their families rank as being most important. *Palliative Medicine*. 2015.
26. Australian Commission on Quality and Safety of Healthcare. Delirium Clinical Care Standard. 2017; <https://www.safetyandquality.gov.au/our-work/clinical-care-standards/delirium-clinical-care-standard/>. Accessed August 20, 2018.
27. Michie S, Stralen MM, West R. The behaviour change wheel: a new method for characterising and designing behaviour change interventions. *Implementation Science*. 2011;6.
28. Teodorczuk A, Mukaetova-Ladinska E, Corbett S, Welfare M. Learning about the patient: an innovative interprofessional dementia and delirium education programme. *Clinical Teaching*. 2014;11(7):497-502.
29. Walsh A. An exploration of Biggs' constructive alignment in the context of work-based learning. *Assessment & Evaluation in Higher Education*. 2007;32(1):79-87.
30. Abernethy A, Shelby-James T, Fazekas B, Woods D, Currow D. The Australia-modified Karnofsky Performance Status (AKPS) scale: a revised scale for contemporary palliative care clinical practice. *BMC Palliative Care*. 2005;4(7):<http://www.biomedcentral.com/content/pdf/1472-1684X-1474-1477.pdf>.
31. Fries BE, Schneider DP, Foley WJ, Gavazzi M, Burke R, Cornelius E. Refining a casemix measure for nursing homes. Resource Utilisation Groups (RUG-III) *Medical Care*. 1994;32:668-685.

## The PRESERVE pilot study

- 1
- 2
- 3
- 4 32. Masso M, Allingham SF, Banfield M, et al. Palliative Care Phase: inter-rater
- 5 reliability and acceptability in a national study. *Palliative Medicine*. 2015;29(1):22-
- 6 30.
- 7 33. Gaudreau JD, Gagnon P, Harel F, Roy MA. Impact on delirium detection of using a
- 8 sensitive instrument integrated into clinical practice. *General Hospital Psychiatry*.
- 9 2005;27(3):194-199.
- 10 34. Grassi L, Caraceni A, Beltrami E, et al. Assessing delirium in cancer patients: the
- 11 Italian versions of the Delirium Rating Scale and the Memorial Delirium Assessment
- 12 Scale. *Journal of Pain and Symptom Management*. 2001;21(1):59-68.
- 13 35. Leonard M, Raju B, Conroy M, et al. Reversibility of delirium in terminally ill
- 14 patients and predictors of mortality. *Palliative Medicine*. 2008;22(7):848-854.
- 15 36. Leonard M, Spiller J, Keen J, MacLulich A, Kamholtz B, Meagher D. Symptoms of
- 16 depression and delirium assessed serially in palliative-care inpatients.
- 17 *Psychosomatics*. 2009;50(5):506-514.
- 18 37. Meagher DJ, Morandi A, Inouye SK, et al. Concordance between DSM-IV and DSM-
- 19 5 criteria for delirium diagnosis in a pooled database of 768 prospectively evaluated
- 20 patients using the delirium rating scale-revised-98. *BMC medicine*. 2014;12:164.
- 21 38. Sepulveda E, Franco JG, Trzepacz PT, et al. Performance of the Delirium Rating
- 22 Scale-Revised-98 Against Different Delirium Diagnostic Criteria in a Population
- 23 With a High Prevalence of Dementia. *Psychosomatics*. 2015;56(5):530-541.
- 24 39. Liamputtong P, Ezzy D. In-depth Interviews. In: *Qualitative Research Methods*. 2nd
- 25 ed. South Melbourne: Oxford University Press; 2005.
- 26 40. Cocks K, D.J. T. Sample size calculations for pilot randomised trials: a confidence
- 27 interval approach. *Journal of Clinical Epidemiology*. 2013;66(2):197-201.
- 28 41. Harris PA, Taylor R, Thielke R, Payne J, Gonzalez N, Conde JG. Research electronic
- 29 data capture (REDCap)—A metadata-driven methodology and workflow process for
- 30 providing translational research informatics support. *Journal of Biomedical*
- 31 *Informatics*. 2009;42(2):377-381.
- 32 42. Chan A, Tetzlaff JM, Altman DG, et al. SPIRIT 2013 statement: Defining standard
- 33 protocol items for clinical trials. *Annals of Internal Medicine*. 2013;158(3):200-207.
- 34 43. Boutron I, Moher D, Altman DG, Schulz KF, Ravaud P. Extending the CONSORT
- 35 statement to randomised trials of nonpharmacologic treatment: explanation and
- 36 elaboration. *Annals of Internal Medicine*. 2008;148(4):295-309.
- 37 44. Campbell MK, Piaggio G, Elbourne DR, Altman DG. Consort 2010 statement:
- 38 extension to cluster randomised trials. *BMJ*. 2012;345:e5661.
- 39 45. Tong A, Sainsbury P, Craig J. Consolidated criteria for reporting qualitative research
- 40 (COREQ): a 32-item checklist for interviews and focus groups. *International journal*
- 41 *for quality in health care : journal of the International Society for Quality in Health*
- 42 *Care / ISQua*. 2007;19.
- 43
- 44
- 45
- 46
- 47
- 48
- 49
- 50
- 51
- 52
- 53
- 54
- 55
- 56
- 57
- 58
- 59
- 60

1 The PRESERVE pilot study  
2

3 **Figure 1: Study Diagram**

4 Standardised delirium screening at all sites + delirium prevention strategies at intervention  
5 sites; control sites wait listed for intervention  
6

7  
8 \* Modified if required  
9

10 **Figure 2: Schedule of study measures and time points** <sup>43</sup>

11 Note: Characteristics indicated with a \* will be collected at baseline from the sites most  
12 recent PCOC report, and then again at study completion directly from PCOC for the specific  
13 time-frame of data collection at each site.  
14

15 **Table 1: Multicomponent delirium prevention intervention**  
16  
17  
18  
19  
20  
21  
22  
23  
24  
25  
26  
27  
28  
29  
30  
31  
32  
33  
34  
35  
36  
37  
38  
39  
40  
41  
42  
43  
44  
45  
46  
47  
48  
49  
50  
51  
52  
53  
54  
55  
56  
57  
58  
59  
60





**Figure 1: Study Diagram**

Standardized delirium screening at all sites + delirium prevention strategies at intervention sites; control sites wait listed for intervention

\* Modified if required.

**Figure 2: Schedule of study measures and time points**<sup>42</sup>

| Measures                                                     | Study period                   |                                 |                    |             |                  |                    |                         |
|--------------------------------------------------------------|--------------------------------|---------------------------------|--------------------|-------------|------------------|--------------------|-------------------------|
|                                                              | Control and intervention sites |                                 |                    |             |                  | Intervention sites |                         |
|                                                              | Baseline                       | Eligibility screen on admission | Admission days 1-7 | Nu-DESC +ve | Study completion | Admission days 1-7 | Intervention completion |
| <b>UNIT LEVEL</b>                                            |                                |                                 |                    |             |                  |                    |                         |
| Geographical location                                        | X                              |                                 |                    |             |                  |                    |                         |
| Type and level of service provision                          | X                              |                                 |                    |             |                  |                    |                         |
| Number of beds                                               | X                              |                                 |                    |             |                  |                    |                         |
| Team composition                                             | X                              |                                 |                    |             |                  |                    |                         |
| Clinical documentation method                                | X                              |                                 |                    |             |                  |                    |                         |
| Delirium process and measures                                | X                              |                                 |                    |             |                  |                    |                         |
| Patient demographics*                                        | X                              |                                 |                    |             | X                |                    |                         |
| Patient function AKPS, RUG-ADL*                              | X                              |                                 |                    |             | X                |                    |                         |
| Palliative care phases*                                      | X                              |                                 |                    |             | X                |                    |                         |
| <b>PATIENT LEVEL</b>                                         |                                |                                 |                    |             |                  |                    |                         |
| Primary diagnosis                                            |                                | X                               |                    |             |                  |                    |                         |
| Age                                                          |                                | X                               |                    |             |                  |                    |                         |
| Nu-DESC                                                      |                                |                                 | X                  |             |                  |                    |                         |
| DSM-5 diagnostic criteria for delirium                       |                                |                                 |                    | X           |                  |                    |                         |
| DRS-R-98                                                     |                                |                                 |                    | X           |                  |                    |                         |
| Adherence to delirium prevention strategies                  |                                |                                 |                    |             |                  | X                  | X (six months post)     |
| <b>SUB-STUDY</b>                                             |                                |                                 |                    |             |                  |                    |                         |
| Brief interviews with patients, family, staff and volunteers |                                |                                 |                    |             |                  |                    | X                       |

Note: Characteristics indicated with a \* will be collected at baseline from the sites most recent PCOC report, and then again at study completion directly from PCOC for the specific time-frame of data collection at each site.



1  
2  
3  
4  
5  
6  
7  
8  
9  
10  
11  
12  
13  
14  
15  
16  
17  
18  
19  
20  
21  
22  
23  
24  
25  
26  
27  
28  
29  
30  
31  
32  
33  
34  
35  
36  
37  
38  
39  
40  
41  
42  
43  
44  
45  
46  
47

SPIRIT 2013 Checklist: Recommended items to address in a clinical trial protocol and related documents\*

| Section/item                      | Item No | Description                                                                                                                                                                                                                                                                              | Addressed on page number |
|-----------------------------------|---------|------------------------------------------------------------------------------------------------------------------------------------------------------------------------------------------------------------------------------------------------------------------------------------------|--------------------------|
| <b>Administrative information</b> |         |                                                                                                                                                                                                                                                                                          |                          |
| Title                             | 1       | Descriptive title identifying the study design, population, interventions, and, if applicable, trial acronym                                                                                                                                                                             | Title page               |
| Trial registration                | 2a      | Trial identifier and registry name. If not yet registered, name of intended registry                                                                                                                                                                                                     | 3 and 25                 |
|                                   | 2b      | All items from the World Health Organization Trial Registration Data Set                                                                                                                                                                                                                 | 25                       |
| Protocol version                  | 3       | Date and version identifier                                                                                                                                                                                                                                                              | 24                       |
| Funding                           | 4       | Sources and types of financial, material, and other support                                                                                                                                                                                                                              | 26                       |
| Roles and responsibilities        | 5a      | Names, affiliations, and roles of protocol contributors                                                                                                                                                                                                                                  | Title page               |
|                                   | 5b      | Name and contact information for the trial sponsor                                                                                                                                                                                                                                       | 26                       |
|                                   | 5c      | Role of study sponsor and funders, if any, in study design; collection, management, analysis, and interpretation of data; writing of the report; and the decision to submit the report for publication, including whether they will have ultimate authority over any of these activities | 26                       |
|                                   | 5d      | Composition, roles, and responsibilities of the coordinating centre, steering committee, endpoint adjudication committee, data management team, and other individuals or groups overseeing the trial, if applicable (see Item 21a for data monitoring committee)                         | 26                       |

## Introduction

|                          |    |                                                                                                                                                                                                           |     |
|--------------------------|----|-----------------------------------------------------------------------------------------------------------------------------------------------------------------------------------------------------------|-----|
| Background and rationale | 6a | Description of research question and justification for undertaking the trial, including summary of relevant studies (published and unpublished) examining benefits and harms for each intervention        | 4-6 |
|                          | 6b | Explanation for choice of comparators                                                                                                                                                                     | 7-8 |
| Objectives               | 7  | Specific objectives or hypotheses                                                                                                                                                                         | 6-7 |
| Trial design             | 8  | Description of trial design including type of trial (eg, parallel group, crossover, factorial, single group), allocation ratio, and framework (eg, superiority, equivalence, noninferiority, exploratory) | 7-8 |

## Methods: Participants, interventions, and outcomes

|                      |     |                                                                                                                                                                                                                                                                                                                                                                                |          |
|----------------------|-----|--------------------------------------------------------------------------------------------------------------------------------------------------------------------------------------------------------------------------------------------------------------------------------------------------------------------------------------------------------------------------------|----------|
| Study setting        | 9   | Description of study settings (eg, community clinic, academic hospital) and list of countries where data will be collected. Reference to where list of study sites can be obtained                                                                                                                                                                                             | 8        |
| Eligibility criteria | 10  | Inclusion and exclusion criteria for participants. If applicable, eligibility criteria for study centres and individuals who will perform the interventions (eg, surgeons, psychotherapists)                                                                                                                                                                                   | 8; 19-20 |
| Interventions        | 11a | Interventions for each group with sufficient detail to allow replication, including how and when they will be administered                                                                                                                                                                                                                                                     | 8-9      |
|                      | 11b | Criteria for discontinuing or modifying allocated interventions for a given trial participant (eg, drug dose change in response to harms, participant request, or improving/worsening disease)                                                                                                                                                                                 | 8-9, 12  |
|                      | 11c | Strategies to improve adherence to intervention protocols, and any procedures for monitoring adherence (eg, drug tablet return, laboratory tests)                                                                                                                                                                                                                              | 12-13    |
|                      | 11d | Relevant concomitant care and interventions that are permitted or prohibited during the trial                                                                                                                                                                                                                                                                                  | 9        |
| Outcomes             | 12  | Primary, secondary, and other outcomes, including the specific measurement variable (eg, systolic blood pressure), analysis metric (eg, change from baseline, final value, time to event), method of aggregation (eg, median, proportion), and time point for each outcome. Explanation of the clinical relevance of chosen efficacy and harm outcomes is strongly recommended | 18-19    |
| Participant timeline | 13  | Time schedule of enrolment, interventions (including any run-ins and washouts), assessments, and visits for participants. A schematic diagram is highly recommended (see Figure)                                                                                                                                                                                               | Figure 2 |
| Sample size          | 14  | Estimated number of participants needed to achieve study objectives and how it was determined, including clinical and statistical assumptions supporting any sample size calculations                                                                                                                                                                                          | 21-22    |

|    |                                                                     |     |                                                                                                                                                                                                                                                                                                                                                                                                              |       |
|----|---------------------------------------------------------------------|-----|--------------------------------------------------------------------------------------------------------------------------------------------------------------------------------------------------------------------------------------------------------------------------------------------------------------------------------------------------------------------------------------------------------------|-------|
| 1  |                                                                     |     |                                                                                                                                                                                                                                                                                                                                                                                                              |       |
| 2  | Recruitment                                                         | 15  | Strategies for achieving adequate participant enrolment to reach target sample size                                                                                                                                                                                                                                                                                                                          | 21-22 |
| 3  |                                                                     |     |                                                                                                                                                                                                                                                                                                                                                                                                              |       |
| 4  |                                                                     |     |                                                                                                                                                                                                                                                                                                                                                                                                              |       |
| 5  | <b>Methods: Assignment of interventions (for controlled trials)</b> |     |                                                                                                                                                                                                                                                                                                                                                                                                              |       |
| 6  | Allocation:                                                         |     |                                                                                                                                                                                                                                                                                                                                                                                                              |       |
| 7  |                                                                     |     |                                                                                                                                                                                                                                                                                                                                                                                                              |       |
| 8  | Sequence generation                                                 | 16a | Method of generating the allocation sequence (eg, computer-generated random numbers), and list of any factors for stratification. To reduce predictability of a random sequence, details of any planned restriction (eg, blocking) should be provided in a separate document that is unavailable to those who enrol participants or assign interventions                                                     | 13    |
| 9  |                                                                     |     |                                                                                                                                                                                                                                                                                                                                                                                                              |       |
| 10 |                                                                     |     |                                                                                                                                                                                                                                                                                                                                                                                                              |       |
| 11 |                                                                     |     |                                                                                                                                                                                                                                                                                                                                                                                                              |       |
| 12 |                                                                     |     |                                                                                                                                                                                                                                                                                                                                                                                                              |       |
| 13 | Allocation concealment mechanism                                    | 16b | Mechanism of implementing the allocation sequence (eg, central telephone; sequentially numbered, opaque, sealed envelopes), describing any steps to conceal the sequence until interventions are assigned                                                                                                                                                                                                    | 13    |
| 14 |                                                                     |     |                                                                                                                                                                                                                                                                                                                                                                                                              |       |
| 15 |                                                                     |     |                                                                                                                                                                                                                                                                                                                                                                                                              |       |
| 16 | Implementation                                                      | 16c | Who will generate the allocation sequence, who will enrol participants, and who will assign participants to interventions                                                                                                                                                                                                                                                                                    | 13    |
| 17 |                                                                     |     |                                                                                                                                                                                                                                                                                                                                                                                                              |       |
| 18 |                                                                     |     |                                                                                                                                                                                                                                                                                                                                                                                                              |       |
| 19 | Blinding (masking)                                                  | 17a | Who will be blinded after assignment to interventions (eg, trial participants, care providers, outcome assessors, data analysts), and how                                                                                                                                                                                                                                                                    | 13-14 |
| 20 |                                                                     |     |                                                                                                                                                                                                                                                                                                                                                                                                              |       |
| 21 |                                                                     |     |                                                                                                                                                                                                                                                                                                                                                                                                              |       |
| 22 |                                                                     | 17b | If blinded, circumstances under which unblinding is permissible, and procedure for revealing a participant's allocated intervention during the trial                                                                                                                                                                                                                                                         | NA    |
| 23 |                                                                     |     |                                                                                                                                                                                                                                                                                                                                                                                                              |       |
| 24 |                                                                     |     |                                                                                                                                                                                                                                                                                                                                                                                                              |       |
| 25 | <b>Methods: Data collection, management, and analysis</b>           |     |                                                                                                                                                                                                                                                                                                                                                                                                              |       |
| 26 |                                                                     |     |                                                                                                                                                                                                                                                                                                                                                                                                              |       |
| 27 | Data collection methods                                             | 18a | Plans for assessment and collection of outcome, baseline, and other trial data, including any related processes to promote data quality (eg, duplicate measurements, training of assessors) and a description of study instruments (eg, questionnaires, laboratory tests) along with their reliability and validity, if known. Reference to where data collection forms can be found, if not in the protocol | 14-15 |
| 28 |                                                                     |     |                                                                                                                                                                                                                                                                                                                                                                                                              |       |
| 29 |                                                                     |     |                                                                                                                                                                                                                                                                                                                                                                                                              |       |
| 30 |                                                                     |     |                                                                                                                                                                                                                                                                                                                                                                                                              |       |
| 31 |                                                                     | 18b | Plans to promote participant retention and complete follow-up, including list of any outcome data to be collected for participants who discontinue or deviate from intervention protocols                                                                                                                                                                                                                    | NA    |
| 32 |                                                                     |     |                                                                                                                                                                                                                                                                                                                                                                                                              |       |
| 33 |                                                                     |     |                                                                                                                                                                                                                                                                                                                                                                                                              |       |
| 34 | Data management                                                     | 19  | Plans for data entry, coding, security, and storage, including any related processes to promote data quality (eg, double data entry; range checks for data values). Reference to where details of data management procedures can be found, if not in the protocol                                                                                                                                            | 22-23 |
| 35 |                                                                     |     |                                                                                                                                                                                                                                                                                                                                                                                                              |       |
| 36 |                                                                     |     |                                                                                                                                                                                                                                                                                                                                                                                                              |       |
| 37 |                                                                     |     |                                                                                                                                                                                                                                                                                                                                                                                                              |       |
| 38 | Statistical methods                                                 | 20a | Statistical methods for analysing primary and secondary outcomes. Reference to where other details of the statistical analysis plan can be found, if not in the protocol                                                                                                                                                                                                                                     | 21    |
| 39 |                                                                     |     |                                                                                                                                                                                                                                                                                                                                                                                                              |       |
| 40 |                                                                     | 20b | Methods for any additional analyses (eg, subgroup and adjusted analyses)                                                                                                                                                                                                                                                                                                                                     | NA    |
| 41 |                                                                     |     |                                                                                                                                                                                                                                                                                                                                                                                                              |       |
| 42 |                                                                     |     |                                                                                                                                                                                                                                                                                                                                                                                                              |       |
| 43 |                                                                     |     |                                                                                                                                                                                                                                                                                                                                                                                                              |       |
| 44 |                                                                     |     |                                                                                                                                                                                                                                                                                                                                                                                                              |       |
| 45 |                                                                     |     |                                                                                                                                                                                                                                                                                                                                                                                                              |       |
| 46 |                                                                     |     |                                                                                                                                                                                                                                                                                                                                                                                                              |       |
| 47 |                                                                     |     |                                                                                                                                                                                                                                                                                                                                                                                                              |       |

|    |                                 |     |                                                                                                                |           |
|----|---------------------------------|-----|----------------------------------------------------------------------------------------------------------------|-----------|
| 1  |                                 |     |                                                                                                                |           |
| 2  |                                 | 20c | Definition of analysis population relating to protocol non-adherence (eg, as randomised analysis), and any     | NA        |
| 3  |                                 |     | statistical methods to handle missing data (eg, multiple imputation)                                           |           |
| 4  |                                 |     |                                                                                                                | _____     |
| 5  |                                 |     |                                                                                                                |           |
| 6  | <b>Methods: Monitoring</b>      |     |                                                                                                                |           |
| 7  | Data monitoring                 | 21a | Composition of data monitoring committee (DMC); summary of its role and reporting structure; statement of      | 22        |
| 8  |                                 |     | whether it is independent from the sponsor and competing interests; and reference to where further details     |           |
| 9  |                                 |     | about its charter can be found, if not in the protocol. Alternatively, an explanation of why a DMC is not      |           |
| 10 |                                 |     | needed                                                                                                         |           |
| 11 |                                 | 21b | Description of any interim analyses and stopping guidelines, including who will have access to these interim   | 22        |
| 12 |                                 |     | results and make the final decision to terminate the trial                                                     |           |
| 13 |                                 |     |                                                                                                                |           |
| 14 | Harms                           | 22  | Plans for collecting, assessing, reporting, and managing solicited and spontaneously reported adverse          | 22        |
| 15 |                                 |     | events and other unintended effects of trial interventions or trial conduct                                    |           |
| 16 |                                 |     |                                                                                                                |           |
| 17 | Auditing                        | 23  | Frequency and procedures for auditing trial conduct, if any, and whether the process will be independent       | NA        |
| 18 |                                 |     | from investigators and the sponsor                                                                             |           |
| 19 |                                 |     |                                                                                                                |           |
| 20 |                                 |     |                                                                                                                |           |
| 21 | <b>Ethics and dissemination</b> |     |                                                                                                                |           |
| 22 | Research ethics                 | 24  | Plans for seeking research ethics committee/institutional review board (REC/IRB) approval                      | 24        |
| 23 | approval                        |     |                                                                                                                |           |
| 24 |                                 |     |                                                                                                                |           |
| 25 | Protocol                        | 25  | Plans for communicating important protocol modifications (eg, changes to eligibility criteria, outcomes,       | NA        |
| 26 | amendments                      |     | analyses) to relevant parties (eg, investigators, REC/IRBs, trial participants, trial registries, journals,    |           |
| 27 |                                 |     | regulators)                                                                                                    |           |
| 28 |                                 |     |                                                                                                                |           |
| 29 | Consent or assent               | 26a | Who will obtain informed consent or assent from potential trial participants or authorised surrogates, and     | 8, 20-21  |
| 30 |                                 |     | how (see Item 32)                                                                                              |           |
| 31 |                                 | 26b | Additional consent provisions for collection and use of participant data and biological specimens in ancillary | NA        |
| 32 |                                 |     | studies, if applicable                                                                                         |           |
| 33 |                                 |     |                                                                                                                |           |
| 34 | Confidentiality                 | 27  | How personal information about potential and enrolled participants will be collected, shared, and maintained   | 22-23, 26 |
| 35 |                                 |     | in order to protect confidentiality before, during, and after the trial                                        |           |
| 36 |                                 |     |                                                                                                                |           |
| 37 | Declaration of                  | 28  | Financial and other competing interests for principal investigators for the overall trial and each study site  | 26        |
| 38 | interests                       |     |                                                                                                                |           |
| 39 | Access to data                  | 29  | Statement of who will have access to the final trial dataset, and disclosure of contractual agreements that    | 22-24     |
| 40 |                                 |     | limit such access for investigators                                                                            |           |
| 41 |                                 |     |                                                                                                                |           |
| 42 |                                 |     |                                                                                                                |           |
| 43 |                                 |     |                                                                                                                |           |
| 44 |                                 |     |                                                                                                                |           |
| 45 |                                 |     |                                                                                                                |           |
| 46 |                                 |     |                                                                                                                |           |
| 47 |                                 |     |                                                                                                                |           |

1  
2  
3  
4  
5  
6  
7  
8  
9  
10  
11  
12  
13  
14  
15  
16  
17  
18  
19  
20  
21  
22  
23  
24  
25  
26  
27  
28  
29  
30  
31  
32  
33  
34  
35  
36  
37  
38  
39  
40  
41  
42  
43  
44  
45  
46  
47

|                               |     |                                                                                                                                                                                                                                                                                     |    |
|-------------------------------|-----|-------------------------------------------------------------------------------------------------------------------------------------------------------------------------------------------------------------------------------------------------------------------------------------|----|
| Ancillary and post-trial care | 30  | Provisions, if any, for ancillary and post-trial care, and for compensation to those who suffer harm from trial participation                                                                                                                                                       | NA |
| Dissemination policy          | 31a | Plans for investigators and sponsor to communicate trial results to participants, healthcare professionals, the public, and other relevant groups (eg, via publication, reporting in results databases, or other data sharing arrangements), including any publication restrictions | 24 |
|                               | 31b | Authorship eligibility guidelines and any intended use of professional writers                                                                                                                                                                                                      | 27 |
|                               | 31c | Plans, if any, for granting public access to the full protocol, participant-level dataset, and statistical code                                                                                                                                                                     | 26 |
| <b>Appendices</b>             |     |                                                                                                                                                                                                                                                                                     |    |
| Informed consent materials    | 32  | Model consent form and other related documentation given to participants and authorised surrogates                                                                                                                                                                                  | 26 |
| Biological specimens          | 33  | Plans for collection, laboratory evaluation, and storage of biological specimens for genetic or molecular analysis in the current trial and for future use in ancillary studies, if applicable                                                                                      | NA |

---

\*It is strongly recommended that this checklist be read in conjunction with the SPIRIT 2013 Explanation & Elaboration for important clarification on the items. Amendments to the protocol should be tracked and dated. The SPIRIT checklist is copyrighted by the SPIRIT Group under the Creative Commons "[Attribution-NonCommercial-NoDerivs 3.0 Unported](https://creativecommons.org/licenses/by-nc-nd/3.0/)" license.
